# Supplementary material
Source: publisher figshare collection journal article supplement (https://gsajournals.figshare.com/ndownloader/files/28321902)
Supplement: Supplementary file 1 [file 28321902]

## Sheet: Table S2
Table S2 Gene annotation in candidate region
#gene_name	COG_class	COG_class_annotation	GO_annotation	KEGG_annotation	KOG_class	KOG_class_annotation	Pfam_annotation	Swissprot_annotation	Nr_annotation
Glyma.02G241900	--	--	Biological Process: nuclear-transcribed mRNA catabolic process (GO:0000956);; Biological Process: response to salt stress (GO:0009651);;	K12850|0.0|vvi:100267328|hypothetical protein LOC100267328	[R]	General function prediction only	PRP38 family;; Pre-mRNA-splicing factor 38-associated hydrophilic C-term	Pre-mRNA-splicing factor 38 GN=PRP38 OS=Arabidopsis thaliana (Mouse-ear cress) PE=1 SV=1	PREDICTED: pre-mRNA-splicing factor 38B-like [Glycine max]
Glyma.02G242000	--	--	Cellular Component: cytosol (GO:0005829);; Biological Process: protein folding (GO:0006457);; Biological Process: response to heat (GO:0009408);; Biological Process: response to high light intensity (GO:0009644);; Biological Process: response to endoplasmic reticulum stress (GO:0034976);; Biological Process: response to hydrogen peroxide (GO:0042542);;	--	[S]	Function unknown	Protein of unknown function (DUF775)	Serine/arginine-rich splicing factor SR45 GN=F19K19.9 OS=Arabidopsis thaliana (Mouse-ear cress) PE=1 SV=1	PREDICTED: protein Hikeshi-like [Glycine max]
Glyma.02G242100	--	--	Biological Process: regionalization (GO:0003002);; Molecular Function: DNA binding (GO:0003677);; Molecular Function: chromatin binding (GO:0003682);; Biological Process: cellular process (GO:0009987);; Biological Process: animal organ development (GO:0048513);;	--	--	--	Myb-like DNA-binding domain	Transcription repressor KAN1 GN=MQK4.31 OS=Arabidopsis thaliana (Mouse-ear cress) PE=1 SV=1	PREDICTED: transcription repressor KAN1-like [Glycine max]
Glyma.02G242200	--	--	Cellular Component: endoplasmic reticulum (GO:0005783);; Cellular Component: integral component of membrane (GO:0016021);;	--	--	--	--	--	hypothetical protein glysoja_013388 [Glycine soja]
Glyma.02G242300	--	--	Cellular Component: vacuolar membrane (GO:0005774);; Biological Process: acetyl-CoA metabolic process (GO:0006084);; Biological Process: calcium ion transport (GO:0006816);; Biological Process: Golgi organization (GO:0007030);; Biological Process: response to salt stress (GO:0009651);; Biological Process: sterol biosynthetic process (GO:0016126);; Biological Process: brassinosteroid biosynthetic …	--	--	--	Fasciclin domain	Fasciclin-like arabinogalactan protein 2 (Precursor) GN=FLA2 OS=Arabidopsis thaliana (Mouse-ear cress) PE=1 SV=1	PREDICTED: fasciclin-like arabinogalactan protein 2-like [Glycine max]
Glyma.02G242400	--	--	Molecular Function: transcription factor activity, sequence-specific DNA binding (GO:0003700);; Biological Process: regulation of transcription, DNA-templated (GO:0006355);; Molecular Function: metal ion binding (GO:0046872);;	--	--	--	--	Zinc finger protein 4 GN=ZFP4 OS=Arabidopsis thaliana (Mouse-ear cress) PE=2 SV=2	PREDICTED: zinc finger protein 4-like isoformX2 [Glycine max]
Glyma.02G242600	--	--	--	--	--	--	--	Zinc finger protein 4 GN=ZFP4 OS=Arabidopsis thaliana (Mouse-ear cress) PE=2 SV=2	PREDICTED: zinc finger protein 4-like [Glycine max]
Glyma.02G242700	[S]	Function unknown	Molecular Function: transmembrane receptor protein serine/threonine kinase activity (GO:0004675);; Molecular Function: non-membrane spanning protein tyrosine kinase activity (GO:0004715);; Molecular Function: ATP binding (GO:0005524);; Cellular Component: extracellular region (GO:0005576);; Cellular Component: plasma membrane (GO:0005886);; Biological Process: transmembrane receptor protein serin…	--	--	--	Leucine Rich repeats (2 copies);; Leucine rich repeat;; Leucine rich repeat N-terminal domain;; Leucine Rich Repeat	Probable receptor protein kinase TMK1 (Precursor) GN=TMK1 OS=Arabidopsis thaliana (Mouse-ear cress) PE=1 SV=1	NAK-type protein kinase precursor [Glycine max]
Glyma.02G242800	[RTKL]	--	Molecular Function: transmembrane receptor protein serine/threonine kinase activity (GO:0004675);; Molecular Function: ATP binding (GO:0005524);; Cellular Component: extracellular region (GO:0005576);; Cellular Component: plasma membrane (GO:0005886);; Biological Process: protein phosphorylation (GO:0006468);; Biological Process: transmembrane receptor protein serine/threonine kinase signaling pa…	--	--	--	Protein kinase domain;; Protein tyrosine kinase	Probable receptor protein kinase TMK1 (Precursor) GN=TMK1 OS=Arabidopsis thaliana (Mouse-ear cress) PE=1 SV=1	Putative receptor protein kinase TMK1 [Glycine soja]
Glyma.02G242900	--	--	Molecular Function: ubiquitin-protein transferase activity (GO:0004842);; Biological Process: defense response (GO:0006952);; Biological Process: response to organic substance (GO:0010033);; Biological Process: protein ubiquitination (GO:0016567);; Molecular Function: ligase activity (GO:0016874);; Biological Process: macromolecule localization (GO:0033036);; Biological Process: cellular response…	--	--	--	U-box domain;; Zinc-finger of the MIZ type in Nse subunit	U-box domain-containing protein 21 GN=PUB21 OS=Arabidopsis thaliana (Mouse-ear cress) PE=2 SV=1	PREDICTED: U-box domain-containing protein 21-like [Glycine max]
Glyma.02G243000	--	--	Cellular Component: intracellular (GO:0005622);; Molecular Function: zinc ion binding (GO:0008270);;	--	--	--	B-box zinc finger	--	PREDICTED: uncharacterized protein At3g50808-like [Glycine max]
Glyma.02G243100	--	--	Cellular Component: intracellular (GO:0005622);; Molecular Function: zinc ion binding (GO:0008270);;	--	--	--	PLATZ transcription factor	Uncharacterized protein At3g50808 GN=At3g50808 OS=Arabidopsis thaliana (Mouse-ear cress) PE=4 SV=1	PREDICTED: uncharacterized protein At3g50808-like [Glycine max]
Glyma.02G243200	[R]	General function prediction only	Biological Process: reproduction (GO:0000003);; Biological Process: transcription, DNA-templated (GO:0006351);; Molecular Function: zinc ion binding (GO:0008270);; Biological Process: single-organism cellular process (GO:0044763);;	--	[R]	General function prediction only	--	PHD finger protein MALE MEIOCYTE DEATH 1 GN=F15E12.11 OS=Arabidopsis thaliana (Mouse-ear cress) PE=2 SV=1	PREDICTED: PHD finger protein MALE MEIOCYTE DEATH 1-like [Glycine max]
Glyma.02G243300	--	--	--	--	--	--	--	--	hypothetical protein glysoja_013395 [Glycine soja]
Glyma.02G243400	[R]	General function prediction only	Molecular Function: voltage-gated potassium channel activity (GO:0005249);; Cellular Component: integral component of membrane (GO:0016021);; Biological Process: potassium ion transmembrane transport (GO:0071805);;	--	[PT]	--	Ankyrin repeats (3 copies);; Ankyrin repeat;; Ankyrin repeats (many copies);; Ankyrin repeats (many copies);; Ankyrin repeat;; Cyclic nucleotide-binding domain;; Domain of unknown function (DUF3354);; Ion transport protein;; Ion channel	Potassium channel SKOR GN=SKOR OS=Arabidopsis thaliana (Mouse-ear cress) PE=1 SV=1	PREDICTED: potassium channel SKOR-like isoform X1 [Glycine max]
Glyma.02G243500	--	--	Cellular Component: mitochondrion (GO:0005739);;	--	[R]	General function prediction only	PPR repeat family;; PPR repeat;; PPR repeat;; Pentatricopeptide repeat domain	Putative pentatricopeptide repeat-containing protein At1g09680 GN=At1g09680 OS=Arabidopsis thaliana (Mouse-ear cress) PE=3 SV=1	PREDICTED: putative pentatricopeptide repeat-containing protein At1g09680-like [Glycine max]
Glyma.02G243600	--	--	Molecular Function: aspartic-type endopeptidase activity (GO:0004190);; Biological Process: proteolysis (GO:0006508);; Molecular Function: transferase activity (GO:0016740);;	--	[O]	Posttranslational modification, protein turnover, chaperones	Xylanase inhibitor N-terminal;; Xylanase inhibitor C-terminal;; Eukaryotic aspartyl protease	Aspartic proteinase PCS1 (Precursor) GN=T7H20.240 OS=Arabidopsis thaliana (Mouse-ear cress) PE=2 SV=1	Aspartic proteinase nepenthesin-1 [Glycine soja]
Glyma.02G243700	[H]	Coenzyme transport and metabolism	Molecular Function: catalytic activity (GO:0003824);; Biological Process: metabolic process (GO:0008152);; Cellular Component: plastid (GO:0009536);;	--	[O]	Posttranslational modification, protein turnover, chaperones	ThiF family	Molybdopterin-synthase sulfurtransferase 1 {ECO:0000255|HAMAP-Rule:MF_03049} OS=Zea mays (Maize) PE=2 SV=1	PREDICTED: uncharacterized protein C1A6.10-like [Glycine max]
Glyma.02G243800	[L]	Replication, recombination and repair	--	K13104|6e-22|vvi:100260334|hypothetical protein LOC100260334	[S]	Function unknown	--	--	PREDICTED: nucleolar and coiled-body phosphoprotein 1 isoform X3 [Glycine max]
Glyma.02G243900	[E]	Amino acid transport and metabolism	Molecular Function: glutamate-ammonia ligase activity (GO:0004356);; Molecular Function: ATP binding (GO:0005524);; Cellular Component: cytoplasm (GO:0005737);; Biological Process: glutamine biosynthetic process (GO:0006542);; Biological Process: nitrogen fixation (GO:0009399);;	K01915|1e-147|vvi:100246404|GS, 2, GS1, GS1-2	[E]	Amino acid transport and metabolism	Glutamine synthetase, catalytic domain;; Glutamine synthetase, beta-Grasp domain	Glutamine synthetase nodule isozyme OS=Vigna aconitifolia (Moth bean) PE=2 SV=1	Glutamine synthetase N-1 [Glycine soja]
Glyma.02G244000	[E]	Amino acid transport and metabolism	Molecular Function: glutamate-ammonia ligase activity (GO:0004356);; Molecular Function: ATP binding (GO:0005524);; Cellular Component: cytoplasm (GO:0005737);; Biological Process: glutamine biosynthetic process (GO:0006542);; Biological Process: nitrogen fixation (GO:0009399);;	K01915|0.0|vvi:100246404|GS, 2, GS1, GS1-2	[E]	Amino acid transport and metabolism	Glutamine synthetase, catalytic domain;; Glutamine synthetase, beta-Grasp domain	Glutamine synthetase cytosolic isozyme 2 OS=Glycine max (Soybean) PE=1 SV=1	PREDICTED: glutamine synthetase cytosolic isozyme 2 isoform 1 [Glycine max]
Glyma.02G244100	[LR]	--	Biological Process: metabolic process (GO:0008152);; Molecular Function: hydrolase activity (GO:0016787);;	--	[T]	Signal transduction mechanisms	NUDIX domain	Nudix hydrolase 17, mitochondrial (Precursor) GN=T8O11.16 OS=Arabidopsis thaliana (Mouse-ear cress) PE=2 SV=1	Nudix hydrolase 17, mitochondrial [Glycine soja]
Glyma.02G244200	--	--	--	--	--	--	Salt stress response/antifungal	Cysteine-rich repeat secretory protein 60 (Precursor) GN=CRRSP60 OS=Arabidopsis thaliana (Mouse-ear cress) PE=1 SV=1	PREDICTED: cysteine-rich repeat secretory protein 60-like [Glycine max]
Glyma.02G244300	[O]	Posttranslational modification, protein turnover, chaperones	Cellular Component: peroxisomal matrix (GO:0005782);; Biological Process: protein folding (GO:0006457);; Biological Process: response to high light intensity (GO:0009644);; Biological Process: response to hydrogen peroxide (GO:0042542);;	--	[O]	Posttranslational modification, protein turnover, chaperones	Hsp20/alpha crystallin family	15.7 kDa heat shock protein, peroxisomal GN=HSP15.7 OS=Arabidopsis thaliana (Mouse-ear cress) PE=2 SV=1	peroxisomal small heat shock protein [Glycine max]
Glyma.02G244400	[RTKL]	--	Molecular Function: transmembrane receptor protein tyrosine kinase activity (GO:0004714);; Molecular Function: ATP binding (GO:0005524);; Cellular Component: integral component of membrane (GO:0016021);; Biological Process: peptidyl-tyrosine phosphorylation (GO:0018108);;	--	--	--	Protein kinase domain;; Protein tyrosine kinase;; Leucine rich repeat N-terminal domain;; Leucine Rich Repeat	Probable inactive receptor kinase At1g48480 (Precursor) GN=RKL1 OS=Arabidopsis thaliana (Mouse-ear cress) PE=2 SV=1	PREDICTED: probable inactive receptor kinase At1g48480-like [Glycine max]
Glyma.02G244500	[R]	General function prediction only	Molecular Function: GTP binding (GO:0005525);; Cellular Component: intracellular (GO:0005622);; Biological Process: intracellular protein transport (GO:0006886);; Biological Process: reciprocal meiotic recombination (GO:0007131);; Biological Process: small GTPase mediated signal transduction (GO:0007264);; Biological Process: cytokinin biosynthetic process (GO:0009691);; Cellular Component: membr…	--	[R]	General function prediction only	ADP-ribosylation factor family;; Ras family;; Miro-like protein;; Gtr1/RagA G protein conserved region;; Signal recognition particle receptor beta subunit;; 50S ribosome-binding GTPase;; Elongation factor Tu GTP binding domain	ADP-ribosylation factor 1 GN=ARF1 OS=Salix bakko (Japanese willow) PE=2 SV=3	uncharacterized protein LOC100305570 [Glycine max]
Glyma.02G244600	[KAD]	--	Molecular Function: DNA binding (GO:0003677);; Molecular Function: chromatin binding (GO:0003682);; Biological Process: cellular macromolecule biosynthetic process (GO:0034645);; Biological Process: cell wall biogenesis (GO:0042546);; Biological Process: xylan metabolic process (GO:0045491);; Biological Process: regulation of cellular process (GO:0050794);;	K09422|1e-130|pop:POPTR_552946|MYB152	[K]	Transcription	Myb-like DNA-binding domain;; Myb-like DNA-binding domain	Protein ODORANT1 GN=ODO1 OS=Petunia hybrida (Petunia) PE=2 SV=1	PREDICTED: protein ODORANT1-like [Glycine max]
Glyma.02G244700	--	--	Molecular Function: protein histidine kinase activity (GO:0004673);; Biological Process: carbohydrate metabolic process (GO:0005975);; Biological Process: defense response (GO:0006952);; Biological Process: peptidyl-histidine phosphorylation (GO:0018106);; Molecular Function: glucan endo-1,3-beta-D-glucosidase activity (GO:0042973);; Cellular Component: anchored component of plasma membrane (GO:0…	--	--	--	Glycosyl hydrolases family 17;; X8 domain	Glucan endo-1,3-beta-glucosidase 2 (Precursor) GN=At1g66250 OS=Arabidopsis thaliana (Mouse-ear cress) PE=1 SV=2	PREDICTED: glucan endo-1,3-beta-glucosidase 2-like isoform X1 [Glycine max]
Glyma.02G244900	--	--	Cellular Component: extracellular region (GO:0005576);; Biological Process: lipid catabolic process (GO:0016042);; Molecular Function: hydrolase activity, acting on ester bonds (GO:0016788);; Molecular Function: 9,9'-dicis-carotene:quinone oxidoreductase activity (GO:0052886);; Molecular Function: 7,9,9'-tricis-neurosporene:quinone oxidoreductase activity (GO:0052887);; Biological Process: 9,9'-d…	--	--	--	GDSL-like Lipase/Acylhydrolase	GDSL esterase/lipase At5g37690 (Precursor) GN=At5g37690 OS=Arabidopsis thaliana (Mouse-ear cress) PE=2 SV=1	PREDICTED: GDSL esterase/lipase At5g37690-like isoform X1 [Glycine max]
Glyma.02G245000	--	--	Cellular Component: nucleosome (GO:0000786);; Molecular Function: DNA binding (GO:0003677);; Cellular Component: nucleus (GO:0005634);; Biological Process: nucleosome assembly (GO:0006334);; Biological Process: regulation of transcription, DNA-templated (GO:0006355);;	--	--	--	linker histone H1 and H5 family	HMG-Y-related protein A OS=Glycine max (Soybean) PE=2 SV=1	PREDICTED: HMG-Y-related protein A-like [Glycine max]
Glyma.02G245100	--	--	Cellular Component: nucleosome (GO:0000786);; Molecular Function: DNA binding (GO:0003677);; Cellular Component: nucleus (GO:0005634);; Biological Process: nucleosome assembly (GO:0006334);; Biological Process: regulation of transcription, DNA-templated (GO:0006355);;	--	--	--	linker histone H1 and H5 family	HMG-Y-related protein A OS=Glycine max (Soybean) PE=2 SV=1	PREDICTED: HMG-Y-related protein A isoform X1 [Glycine max]
Glyma.02G245200	--	--	--	--	--	--	Zein-binding	Myosin-binding protein 3 {ECO:0000303|PubMed:23995081} OS=Arabidopsis thaliana (Mouse-ear cress) PE=1 SV=1	PREDICTED: intracellular protein transport protein USO1-like isoform X1 [Glycine max]
Glyma.02G245300	--	--	Cellular Component: chloroplast (GO:0009507);; Biological Process: leaf senescence (GO:0010150);; Biological Process: vegetative to reproductive phase transition of meristem (GO:0010228);; Biological Process: myo-inositol hexakisphosphate biosynthetic process (GO:0010264);; Biological Process: cellular response to oxidative stress (GO:0034599);; Biological Process: reactive oxygen species metabol…	--	--	--	--	--	PREDICTED: uncharacterized protein LOC100794223 isoformX1 [Glycine max]
Glyma.02G245400	--	--	Biological Process: rRNA processing (GO:0006364);; Cellular Component: nuclear lumen (GO:0031981);; Biological Process: single-organism process (GO:0044699);;	--	[J]	Translation, ribosomal structure and biogenesis	CBF/Mak21 family	Proline-rich receptor-like protein kinase PERK1 GN=PERK1 OS=Arabidopsis thaliana (Mouse-ear cress) PE=2 SV=1	PREDICTED: nucleolar complex protein 4 homolog [Glycine max]
Glyma.02G245500	--	--	Cellular Component: integral component of membrane (GO:0016021);;	--	[S]	Function unknown	Uncharacterised conserved protein (DUF2359)	--	PREDICTED: uncharacterized protein LOC100795617 isoform 1 [Glycine max]
Glyma.02G245600	--	--	Cellular Component: proteinaceous extracellular matrix (GO:0005578);; Cellular Component: cell wall (GO:0005618);; Cellular Component: plasmodesma (GO:0009506);; Biological Process: gibberellic acid mediated signaling pathway (GO:0009740);; Biological Process: response to salicylic acid (GO:0009751);; Biological Process: heat acclimation (GO:0010286);;	--	--	--	Gibberellin regulated protein	Protein RSI-1 (Precursor) GN=RSI-1 OS=Solanum lycopersicum (Tomato) PE=2 SV=1	gibberellic acid-stimulated protein 1 [Glycine soja]
Glyma.02G245700	[TZDR]	--	Molecular Function: calcium ion binding (GO:0005509);;	K13448|1e-61|pop:POPTR_711309|hypothetical protein	[T]	Signal transduction mechanisms	EF hand;; EF-hand domain pair;; EF-hand domain;; EF-hand domain pair;; EF hand;; EF-hand domain;; Secreted protein acidic and rich in cysteine Ca binding region	Probable calcium-binding protein CML18 GN=OJ1532_D06.3 OS=Oryza sativa subsp. japonica (Rice) PE=2 SV=1	PREDICTED: probable calcium-binding protein CML18-like [Glycine max]
Glyma.02G245800	[G]	Carbohydrate transport and metabolism	Molecular Function: ribokinase activity (GO:0004747);; Biological Process: D-ribose metabolic process (GO:0006014);; Molecular Function: fructokinase activity (GO:0008865);; Cellular Component: chloroplast stroma (GO:0009570);; Biological Process: cysteine biosynthetic process (GO:0019344);; Biological Process: carbohydrate phosphorylation (GO:0046835);;	K00847|0.0|vvi:100258640|hypothetical protein LOC100258640	[G]	Carbohydrate transport and metabolism	pfkB family carbohydrate kinase	Probable fructokinase-6, chloroplastic (Precursor) OS=Arabidopsis thaliana (Mouse-ear cress) PE=2 SV=1	uncharacterized protein LOC100797023 [Glycine max]
Glyma.02G245900	[TZDR]	--	Molecular Function: calcium ion binding (GO:0005509);; Cellular Component: endomembrane system (GO:0012505);; Cellular Component: membrane (GO:0016020);;	K13448|4e-41|vvi:100250439|hypothetical protein LOC100250439	[T]	Signal transduction mechanisms	EF hand;; EF-hand domain pair;; EF-hand domain pair;; EF hand;; EF-hand domain	Polcalcin Nic t 1 GN=Nict1 OS=Nicotiana tabacum (Common tobacco) PE=1 SV=1	Polcalcin Nic t 1 [Glycine soja]
Glyma.02G246000	[RTKL]	--	Molecular Function: protein serine/threonine kinase activity (GO:0004674);; Molecular Function: non-membrane spanning protein tyrosine kinase activity (GO:0004715);; Molecular Function: ATP binding (GO:0005524);; Biological Process: peptidyl-tyrosine phosphorylation (GO:0018108);;	--	[T]	Signal transduction mechanisms	Protein kinase domain;; Protein tyrosine kinase	Serine/threonine-protein kinase CDL1 {ECO:0000305} OS=Arabidopsis thaliana (Mouse-ear cress) PE=1 SV=1	Proline-rich receptor-like protein kinase PERK13-like protein [Glycine soja]
Glyma.02G246100	--	--	Molecular Function: RNA binding (GO:0003723);; Molecular Function: ribonuclease III activity (GO:0004525);; Biological Process: rRNA catabolic process (GO:0016075);; Biological Process: RNA phosphodiester bond hydrolysis, endonucleolytic (GO:0090502);;	--	--	--	Double-stranded RNA binding motif	Double-stranded RNA-binding protein 4 GN=B1090H08.31 OS=Oryza sativa subsp. japonica (Rice) PE=2 SV=1	PREDICTED: double-stranded RNA-binding protein 4-like isoform X2 [Glycine max]
Glyma.02G246400	--	--	Biological Process: metabolic process (GO:0008152);; Molecular Function: hydrolase activity (GO:0016787);; Molecular Function: protein dimerization activity (GO:0046983);;	--	--	--	Helix-loop-helix DNA-binding domain	Putative transcription factor bHLH086 GN=K22F20.8 OS=Arabidopsis thaliana (Mouse-ear cress) PE=3 SV=2	Putative transcription factor bHLH086-like protein [Glycine soja]
Glyma.02G246500	--	--	--	--	[S]	Function unknown	Armadillo/beta-catenin-like repeat;; HEAT repeats;; Armadillo-like	U-box domain-containing protein 4 GN=PUB4 OS=Arabidopsis thaliana (Mouse-ear cress) PE=1 SV=3	PREDICTED: U-box domain-containing protein 4-like [Glycine max]
Glyma.02G246700	[G]	Carbohydrate transport and metabolism	Molecular Function: transporter activity (GO:0005215);; Biological Process: transport (GO:0006810);; Cellular Component: integral component of membrane (GO:0016021);;	--	[G]	Carbohydrate transport and metabolism	Major intrinsic protein	Probable aquaporin NIP-type OS=Nicotiana alata (Winged tobacco) PE=2 SV=1	PREDICTED: probable aquaporin NIP-type-like [Glycine max]
Glyma.02G246800	--	--	--	--	--	--	--	Formin-like protein 20 GN=MBK20.20/MBK20.21 OS=Arabidopsis thaliana (Mouse-ear cress) PE=2 SV=3	PREDICTED: formin-1-like [Glycine max]
Glyma.02G246900	--	--	Cellular Component: integral component of membrane (GO:0016021);;	--	--	--	--	--	PREDICTED: uncharacterized protein LOC100798625 [Glycine max]
Glyma.02G247000	--	--	--	--	--	--	Domain of unknown function (DUF4228)	Uncharacterized protein At1g66480 GN=At1g66480 OS=Arabidopsis thaliana (Mouse-ear cress) PE=2 SV=1	PREDICTED: uncharacterized protein At1g66480-like [Glycine max]
Glyma.02G247100	[KAD]	--	Molecular Function: DNA binding (GO:0003677);; Molecular Function: chromatin binding (GO:0003682);;	K09422|1e-91|vvi:100251783|hypothetical protein LOC100251783	[K]	Transcription	Myb-like DNA-binding domain;; Myb-like DNA-binding domain	Transcription repressor MYB4 GN=MYB4 OS=Arabidopsis thaliana (Mouse-ear cress) PE=1 SV=1	uncharacterized protein LOC100306391 [Glycine max]
Glyma.02G247200	--	--	--	--	[T]	Signal transduction mechanisms	--	Vegetative cell wall protein gp1 (Precursor) GN=GP1 OS=Chlamydomonas reinhardtii (Chlamydomonas smithii) PE=1 SV=1	hypothetical protein PHAVU_008G233700g [Phaseolus vulgaris]
Glyma.02G247300	--	--	--	--	[S]	Function unknown	CLASP N terminal	--	PREDICTED: uncharacterized protein LOC100799668 isoform X1 [Glycine max]
Glyma.02G247400	--	--	Biological Process: mitotic cell cycle (GO:0000278);; Biological Process: RNA processing (GO:0006396);; Biological Process: protein folding (GO:0006457);; Biological Process: response to heat (GO:0009408);; Biological Process: response to high light intensity (GO:0009644);; Biological Process: response to hydrogen peroxide (GO:0042542);;	K13205|0.0|pop:POPTR_553019|hypothetical protein	[A]	RNA processing and modification	AAR2 protein	--	PREDICTED: protein AAR2 homolog isoform X1 [Glycine max]
Glyma.02G247600	[RTKL]	--	Molecular Function: protein serine/threonine kinase activity (GO:0004674);; Molecular Function: non-membrane spanning protein tyrosine kinase activity (GO:0004715);; Molecular Function: ATP binding (GO:0005524);; Biological Process: peptidyl-tyrosine phosphorylation (GO:0018108);;	--	[T]	Signal transduction mechanisms	Protein tyrosine kinase;; Protein kinase domain	Protein kinase APK1A, chloroplastic (Precursor) GN=APK1A OS=Arabidopsis thaliana (Mouse-ear cress) PE=2 SV=1	PREDICTED: protein kinase APK1A, chloroplastic-like isoform 1 [Glycine max]
Glyma.02G247700	[R]	General function prediction only	Cellular Component: cytoplasm (GO:0005737);; Molecular Function: RNA methyltransferase activity (GO:0008173);; Biological Process: chloroplast organization (GO:0009658);; Biological Process: tRNA methylation (GO:0030488);; Biological Process: protein targeting to chloroplast (GO:0045036);; Molecular Function: iron-sulfur cluster binding (GO:0051536);; Biological Process: rRNA base methylation (GO…	K06941|0.0|rcu:RCOM_0000920|catalytic, putative	--	--	Radical SAM superfamily;; 4Fe-4S single cluster domain	--	PREDICTED: uncharacterized protein LOC100801657 [Glycine max]
Glyma.02G247800	[R]	General function prediction only	Molecular Function: nucleotide binding (GO:0000166);; Biological Process: mRNA splicing, via spliceosome (GO:0000398);; Molecular Function: nucleic acid binding (GO:0003676);; Biological Process: response to oxidative stress (GO:0006979);; Cellular Component: nuclear speck (GO:0016607);;	--	[R]	General function prediction only	RNA recognition motif. (a.k.a. RRM, RBD, or RNP domain);; RNA recognition motif (a.k.a. RRM, RBD, or RNP domain);; RNA recognition motif. (a.k.a. RRM, RBD, or RNP domain)	Serine/arginine-rich SC35-like splicing factor SCL30 GN=SCL30 OS=Arabidopsis thaliana (Mouse-ear cress) PE=1 SV=1	PREDICTED: serine/arginine-rich splicing factor 33-like isoform X1 [Glycine max]
Glyma.02G247900	--	--	Biological Process: protein targeting to membrane (GO:0006612);; Biological Process: positive regulation of flavonoid biosynthetic process (GO:0009963);; Biological Process: regulation of plant-type hypersensitive response (GO:0010363);; Molecular Function: ligase activity (GO:0016874);;	--	[R]	General function prediction only	C2 domain	Elicitor-responsive protein 1 GN=ERG1 OS=Oryza sativa subsp. japonica (Rice) PE=2 SV=1	uncharacterized protein LOC100500493 [Glycine max]
Glyma.02G248000	[O]	Posttranslational modification, protein turnover, chaperones	Biological Process: metabolic process (GO:0008152);; Molecular Function: ligase activity (GO:0016874);;	--	[R]	General function prediction only	C2 domain	Elicitor-responsive protein 1 GN=ERG1 OS=Oryza sativa subsp. japonica (Rice) PE=2 SV=1	PREDICTED: elicitor-responsive protein 1-like [Glycine max]
Glyma.02G248100	[O]	Posttranslational modification, protein turnover, chaperones	Biological Process: metabolic process (GO:0008152);; Molecular Function: ligase activity (GO:0016874);;	--	[R]	General function prediction only	C2 domain	Elicitor-responsive protein 1 GN=ERG1 OS=Oryza sativa subsp. japonica (Rice) PE=2 SV=1	PREDICTED: elicitor-responsive protein 1-like [Glycine max]
Glyma.02G248200	--	--	--	--	--	--	Protein of unknown function, DUF547	--	PREDICTED: uncharacterized protein LOC100811695 isoform X2 [Glycine max]
Glyma.02G248300	--	--	Cellular Component: Golgi apparatus (GO:0005794);; Biological Process: intracellular protein transport (GO:0006886);; Biological Process: Golgi to vacuole transport (GO:0006896);; Biological Process: endocytosis (GO:0006897);; Cellular Component: AP-3 adaptor complex (GO:0030123);; Cellular Component: clathrin-coated vesicle membrane (GO:0030665);; Biological Process: regulation of intracellular …	K12397|0.0|vvi:100251289|hypothetical protein LOC100251289	[U]	Intracellular trafficking, secretion, and vesicular transport	Adaptin N terminal region;; HEAT repeats;; HEAT repeat;; Clathrin-adaptor complex-3 beta-1 subunit C-terminal;; non-SMC mitotic condensation complex subunit 1	AP3-complex subunit beta-A GN=T22E16.140 OS=Arabidopsis thaliana (Mouse-ear cress) PE=2 SV=2	PREDICTED: AP3-complex subunit beta-A-like [Glycine max]
Glyma.02G248400	--	--	Biological Process: gene silencing by RNA (GO:0031047);;	--	--	--	XS zinc finger domain;; XH domain;; XS domain;; Drought induced 19 protein (Di19), zinc-binding;; Ig-like C2-type domain;; NurA domain	Protein INVOLVED IN DE NOVO 2 {ECO:0000303|PubMed:19915591} OS=Arabidopsis thaliana (Mouse-ear cress) PE=1 SV=1	PREDICTED: uncharacterized protein LOC100806426 isoform X1 [Glycine max]
Glyma.02G248500	--	--	Cellular Component: extracellular region (GO:0005576);; Cellular Component: cell wall (GO:0005618);; Biological Process: plant-type cell wall organization (GO:0009664);; Cellular Component: membrane (GO:0016020);;	--	--	--	Rare lipoprotein A (RlpA)-like double-psi beta-barrel;; Pollen allergen	Expansin-A4 (Precursor) GN=F17A14.7 OS=Arabidopsis thaliana (Mouse-ear cress) PE=1 SV=1	PREDICTED: expansin-A4-like [Glycine max]
Glyma.02G248600	--	--	Molecular Function: transferase activity (GO:0016740);; Biological Process: methylation (GO:0032259);; Biological Process: cellular metabolic process (GO:0044237);; Biological Process: organic substance metabolic process (GO:0071704);;	--	[AR]	--	--	--	unknown [Glycine max]
Glyma.02G248700	[Z]	Cytoskeleton	Biological Process: DNA repair (GO:0006281);; Biological Process: regulation of transcription, DNA-templated (GO:0006355);; Cellular Component: Ino80 complex (GO:0031011);;	K11672|0.0|vvi:100258127|hypothetical protein LOC100258127	[Z]	Cytoskeleton	Actin	Actin-related protein 5 GN=ARP5 OS=Arabidopsis thaliana (Mouse-ear cress) PE=1 SV=2	PREDICTED: actin-related protein 5-like isoformX1 [Glycine max]
Glyma.02G248800	--	--	Molecular Function: protein binding (GO:0005515);;	--	--	--	--	--	hypothetical protein glysoja_013446 [Glycine soja]
Glyma.02G248900	--	--	--	--	--	--	DVL family	--	PREDICTED: uncharacterized protein LOC100805174 [Glycine max]
Glyma.02G249000	--	--	Molecular Function: aspartic-type endopeptidase activity (GO:0004190);; Biological Process: proteolysis (GO:0006508);;	--	[O]	Posttranslational modification, protein turnover, chaperones	Xylanase inhibitor C-terminal;; Xylanase inhibitor N-terminal;; Eukaryotic aspartyl protease	Aspartic proteinase PCS1 (Precursor) GN=T7H20.240 OS=Arabidopsis thaliana (Mouse-ear cress) PE=2 SV=1	PREDICTED: aspartic proteinase PCS1-like [Glycine max]
Glyma.02G249100	--	--	Biological Process: metabolic process (GO:0008152);; Molecular Function: zinc ion binding (GO:0008270);; Molecular Function: ligase activity (GO:0016874);;	--	[O]	Posttranslational modification, protein turnover, chaperones	Protein of unknown function (DUF1117);; zinc-finger;; Ring finger domain;; RING-H2 zinc finger;; Zinc finger, C3HC4 type (RING finger);; Anaphase-promoting complex subunit 11 RING-H2 finger	E3 ubiquitin-protein ligase RING1-like GN=At3g19950 OS=Arabidopsis thaliana (Mouse-ear cress) PE=1 SV=1	PREDICTED: E3 ubiquitin-protein ligase RING1-like [Glycine max]
Glyma.02G249200	--	--	Biological Process: metabolic process (GO:0008152);; Molecular Function: ligase activity (GO:0016874);;	--	--	--	--	--	E3 ubiquitin-protein ligase RING1 [Glycine soja]
Glyma.02G249300	--	--	Molecular Function: 1-acylglycerol-3-phosphate O-acyltransferase activity (GO:0003841);; Molecular Function: glycerol-3-phosphate O-acyltransferase activity (GO:0004366);; Biological Process: metabolic process (GO:0008152);;	K13508|0.0|pop:POPTR_805502|1-acylglycerol-3-phosphate O-acyltransferase (EC:2.3.1.51)	--	--	Acyltransferase	Glycerol-3-phosphate acyltransferase 5 GN=GPAT5 OS=Arabidopsis thaliana (Mouse-ear cress) PE=1 SV=1	PREDICTED: glycerol-3-phosphate acyltransferase 5-like [Glycine max]
Glyma.02G249400	--	--	Molecular Function: DNA binding (GO:0003677);; Molecular Function: chromatin binding (GO:0003682);; Cellular Component: nucleus (GO:0005634);;	--	[O]	Posttranslational modification, protein turnover, chaperones	--	Protein RADIALIS-like 3 GN=RL3 OS=Arabidopsis thaliana (Mouse-ear cress) PE=2 SV=1	PREDICTED: protein RADIALIS-like 6-like [Glycine max]
Glyma.02G249500	--	--	--	--	--	--	Thaumatin family	Thaumatin-like protein (Precursor) OS=Oryza sativa subsp. japonica (Rice) PE=2 SV=1	PREDICTED: thaumatin-like protein-like [Glycine max]
Glyma.02G249600	--	--	Molecular Function: ATP binding (GO:0005524);;	--	[O]	Posttranslational modification, protein turnover, chaperones	ATPase family associated with various cellular activities (AAA)	Ribulose bisphosphate carboxylase/oxygenase activase 1, chloroplastic (Precursor) GN=RCA1 OS=Larrea tridentata (Creosote bush) PE=1 SV=1	ribulose bisphosphate carboxylase/oxygenase activase 1, chloroplastic-like [Glycine max]
Glyma.02G249700	--	--	--	--	--	--	Protein of unknown function DUF260	LOB domain-containing protein 33 GN=K16F4.4 OS=Arabidopsis thaliana (Mouse-ear cress) PE=2 SV=1	LOB domain-containing protein 33 [Glycine soja]
Glyma.02G249800	--	--	--	--	--	--	Domain of unknown function (DUF296)	AT-hook motif nuclear-localized protein 15 {ECO:0000312|EMBL:FAA00286.1} OS=Arabidopsis thaliana (Mouse-ear cress) PE=2 SV=1	PREDICTED: putative DNA-binding protein ESCAROLA-like [Glycine max]
Glyma.02G250000	[R]	General function prediction only	Biological Process: cytokinesis by cell plate formation (GO:0000911);; Biological Process: establishment of planar polarity (GO:0001736);; Biological Process: regionalization (GO:0003002);; Molecular Function: ARF guanyl-nucleotide exchange factor activity (GO:0005086);; Cellular Component: cytosol (GO:0005829);; Cellular Component: plasma membrane (GO:0005886);; Biological Process: gluconeogenes…	--	[U]	Intracellular trafficking, secretion, and vesicular transport	Sec7 domain;; Guanine nucleotide exchange factor in Golgi transport N-terminal	ARF guanine-nucleotide exchange factor GNOM GN=At1g13980 OS=Arabidopsis thaliana (Mouse-ear cress) PE=1 SV=1	PREDICTED: ARF guanine-nucleotide exchange factor GNOM-like isoform X1 [Glycine max]
Glyma.02G250100	--	--	--	--	--	--	--	Probable transcriptional regulator RABBIT EARS GN=RBE OS=Arabidopsis thaliana (Mouse-ear cress) PE=2 SV=2	PREDICTED: uncharacterized protein LOC102662367 [Glycine max]
Glyma.02G250200	[T]	Signal transduction mechanisms	Molecular Function: protein serine/threonine phosphatase activity (GO:0004722);; Biological Process: protein dephosphorylation (GO:0006470);; Biological Process: abscisic acid-activated signaling pathway (GO:0009738);; Cellular Component: intracellular part (GO:0044424);; Molecular Function: metal ion binding (GO:0046872);; Biological Process: negative regulation of cellular process (GO:0048523);;	K14497|1e-169|vvi:100247958|hypothetical protein LOC100247958	[T]	Signal transduction mechanisms	Protein phosphatase 2C;; Protein phosphatase 2C	Protein phosphatase 2C 37 GN=F24K9.8 OS=Arabidopsis thaliana (Mouse-ear cress) PE=1 SV=1	PREDICTED: protein phosphatase 2C 37-like [Glycine max]
Glyma.02G250300	--	--	--	--	--	--	--	--	PREDICTED: uncharacterized protein LOC100780317 [Glycine max]
Glyma.02G250400	--	--	Cellular Component: Golgi membrane (GO:0000139);; Cellular Component: endosome (GO:0005768);; Cellular Component: trans-Golgi network (GO:0005802);; Molecular Function: methyltransferase activity (GO:0008168);; Cellular Component: integral component of membrane (GO:0016021);; Biological Process: methylation (GO:0032259);;	--	--	--	Putative S-adenosyl-L-methionine-dependent methyltransferase;; Methyltransferase domain	Probable methyltransferase PMT11 GN=At2g39750 OS=Arabidopsis thaliana (Mouse-ear cress) PE=2 SV=1	PREDICTED: probable methyltransferase PMT11-like [Glycine max]
Glyma.02G250500	--	--	--	--	--	--	--	--	PREDICTED: uncharacterized protein LOC102668661 [Glycine max]
Glyma.02G250600	--	--	--	--	[R]	General function prediction only	PPR repeat family;; PPR repeat;; PPR repeat;; Pentatricopeptide repeat domain;; Tetratricopeptide repeat	Pentatricopeptide repeat-containing protein At2g34400 OS=Arabidopsis thaliana (Mouse-ear cress) PE=3 SV=2	PREDICTED: pentatricopeptide repeat-containing protein At2g34400-like isoform X1 [Glycine max]
Glyma.02G250700	[DZ]	--	Molecular Function: kinase activity (GO:0016301);; Biological Process: phosphorylation (GO:0016310);; Molecular Function: ligase activity (GO:0016874);;	--	[S]	Function unknown	Regulator of chromosome condensation (RCC1) repeat;; Regulator of chromosome condensation (RCC1) repeat	Ultraviolet-B receptor UVR8 GN=UVR8 OS=Arabidopsis thaliana (Mouse-ear cress) PE=1 SV=1	PREDICTED: probable E3 ubiquitin-protein ligase HERC1-like isoform X3 [Glycine max]
Glyma.02G250800	[MJ]	--	Molecular Function: mannose-1-phosphate guanylyltransferase (GDP) activity (GO:0008928);; Biological Process: biosynthetic process (GO:0009058);;	K00971|0.0|vvi:100233006|GDP-D-mannose pyrophosphorylase	[M]	Cell wall/membrane/envelope biogenesis	Nucleotidyl transferase;; MobA-like NTP transferase domain;; Bacterial transferase hexapeptide (six repeats)	Mannose-1-phosphate guanylyltransferase 1 GN=At2g39770 OS=Arabidopsis thaliana (Mouse-ear cress) PE=1 SV=1	Mannose-1-phosphate guanylyltransferase 1 [Glycine soja]
Glyma.02G250900	--	--	Cellular Component: nucleus (GO:0005634);; Cellular Component: cytosol (GO:0005829);; Biological Process: DNA-dependent DNA replication (GO:0006261);; Biological Process: chromatin silencing at telomere (GO:0006348);; Biological Process: regulation of flower development (GO:0009909);; Molecular Function: H4 histone acetyltransferase activity (GO:0010485);; Biological Process: histone H4 acetylati…	K11303|0.0|vvi:100250987|hypothetical protein LOC100250987	[B]	Chromatin structure and dynamics	Histone acetyl transferase HAT1 N-terminus;; MOZ/SAS family;; Acetyltransferase (GNAT) family	Histone acetyltransferase type B catalytic subunit GN=MIK19.19 OS=Arabidopsis thaliana (Mouse-ear cress) PE=2 SV=1	PREDICTED: histone acetyltransferase type B catalytic subunit-like [Glycine max]
Glyma.02G251000	--	--	Cellular Component: mitochondrial matrix (GO:0005759);;	--	[C]	Energy production and conversion	Mitochondrial glycoprotein	Uncharacterized protein At2g39795, mitochondrial (Precursor) GN=At2g39795 OS=Arabidopsis thaliana (Mouse-ear cress) PE=2 SV=1	Hypothetical protein glysoja_037555 [Glycine soja]
Glyma.02G251100	[E]	Amino acid transport and metabolism	Molecular Function: 1-pyrroline-5-carboxylate dehydrogenase activity (GO:0003842);; Molecular Function: glutamate 5-kinase activity (GO:0004349);; Molecular Function: glutamate-5-semialdehyde dehydrogenase activity (GO:0004350);; Cellular Component: cytoplasm (GO:0005737);; Biological Process: proline biosynthetic process (GO:0006561);; Biological Process: phosphorylation (GO:0016310);; Biologica…	K12657|0.0|rcu:RCOM_1482350|delta 1-pyrroline-5-carboxylate synthetase, putative (EC:2.7.2.11 1.2.1.41)	[E]	Amino acid transport and metabolism	Amino acid kinase family;; Aldehyde dehydrogenase family	Gamma-glutamyl phosphate reductase OS=Vigna aconitifolia (Moth bean) PE=2 SV=1	PREDICTED: delta-1-pyrroline-5-carboxylate synthase-like [Glycine max]
Glyma.02G251200	--	--	Cellular Component: integral component of membrane (GO:0016021);;	--	[S]	Function unknown	Yip1 domain	--	PREDICTED: protein YIPF1 homolog isoform X1 [Glycine max]
Glyma.02G251300	--	--	Biological Process: biosynthetic process (GO:0009058);;	--	[GMW]	--	Exostosin family	Probable glycosyltransferase At5g03795 GN=At5g03795 OS=Arabidopsis thaliana (Mouse-ear cress) PE=3 SV=2	hypothetical protein glysoja_037552 [Glycine soja]
Glyma.02G251400	[H]	Coenzyme transport and metabolism	Molecular Function: tetrahydrofolylpolyglutamate synthase activity (GO:0004326);; Molecular Function: ATP binding (GO:0005524);; Biological Process: one-carbon metabolic process (GO:0006730);; Biological Process: tetrahydrofolylpolyglutamate biosynthetic process (GO:0046901);;	K01930|0.0|rcu:RCOM_1482420|folylpolyglutamate synthase, putative (EC:6.3.2.17)	[H]	Coenzyme transport and metabolism	Mur ligase middle domain	Folylpolyglutamate synthase {ECO:0000250|UniProtKB:Q05932, ECO:0000312|EMBL:CAC80839.2} GN=K18J17.17 OS=Arabidopsis thaliana (Mouse-ear cress) PE=1 SV=1	PREDICTED: folylpolyglutamate synthase-like isoform X2 [Glycine max]
Glyma.02G251500	[R]	General function prediction only	Biological Process: cell plate assembly (GO:0000919);; Cellular Component: kinetochore microtubule (GO:0005828);; Biological Process: embryo sac development (GO:0009553);; Biological Process: pollen development (GO:0009555);; Biological Process: positive regulation of cytokinesis (GO:0032467);; Biological Process: regulation of mitotic spindle organization (GO:0060236);; Biological Process: regul…	--	[T]	Signal transduction mechanisms	WD domain, G-beta repeat	COMPASS-like H3K4 histone methylase component WDR5A {ECO:0000303|PubMed:19567704} OS=Arabidopsis thaliana (Mouse-ear cress) PE=1 SV=1	PREDICTED: protein NEDD1-like [Glycine max]
Glyma.02G251600	[T]	Signal transduction mechanisms	Cellular Component: protein phosphatase type 1 complex (GO:0000164);; Molecular Function: protein serine/threonine phosphatase activity (GO:0004722);; Biological Process: protein dephosphorylation (GO:0006470);; Biological Process: N-terminal protein myristoylation (GO:0006499);; Molecular Function: metal ion binding (GO:0046872);;	K06269|0.0|pop:POPTR_724597|hypothetical protein	[TR]	--	Calcineurin-like phosphoesterase	Serine/threonine-protein phosphatase PP1 isozyme 4 GN=TOPP4 OS=Arabidopsis thaliana (Mouse-ear cress) PE=1 SV=1	uncharacterized protein LOC100811593 [Glycine max]
Glyma.02G251700	[R]	General function prediction only	--	K11806|0.0|vvi:100260774|hypothetical protein LOC100260774	[A]	RNA processing and modification	WD domain, G-beta repeat;; Sof1-like domain;; Eukaryotic translation initiation factor eIF2A	COMPASS-like H3K4 histone methylase component WDR5B {ECO:0000303|PubMed:19567704} OS=Arabidopsis thaliana (Mouse-ear cress) PE=1 SV=1	PREDICTED: DDB1- and CUL4-associated factor 13 [Glycine max]
Glyma.02G251800	--	--	Molecular Function: zinc ion binding (GO:0008270);;	--	[TZ]	--	Protein of unknown function (DUF3633);; LIM domain	Protein DA1-related 2 GN=DAR2 OS=Arabidopsis thaliana (Mouse-ear cress) PE=2 SV=1	PREDICTED: protein DA1-related 2-like isoform X2 [Glycine max]
Glyma.02G251900	--	--	Cellular Component: plasma membrane (GO:0005886);; Cellular Component: integral component of membrane (GO:0016021);; Biological Process: transmembrane transport (GO:0055085);;	--	[C]	Energy production and conversion	Mitochondrial carrier protein	Mitochondrial adenine nucleotide transporter ADNT1 OS=Arabidopsis thaliana (Mouse-ear cress) PE=2 SV=1	PREDICTED: mitochondrial substrate carrier family protein V-like isoform X2 [Glycine max]
Glyma.02G252000	[R]	General function prediction only	Molecular Function: GTPase activity (GO:0003924);; Molecular Function: GTP binding (GO:0005525);; Cellular Component: intracellular (GO:0005622);; Biological Process: intracellular protein transport (GO:0006886);; Biological Process: nucleocytoplasmic transport (GO:0006913);; Biological Process: small GTPase mediated signal transduction (GO:0007264);; Biological Process: metabolic process (GO:000…	--	[U]	Intracellular trafficking, secretion, and vesicular transport	Ras family;; Miro-like protein;; ADP-ribosylation factor family;; 50S ribosome-binding GTPase;; Elongation factor Tu GTP binding domain	Ras-related protein Rab11C GN=RAB11C OS=Lotus japonicus (Lotus corniculatus var. japonicus) PE=2 SV=1	PREDICTED: ras-related protein Rab11C-like [Glycine max]
Glyma.02G252100	--	--	Molecular Function: serine-type endopeptidase activity (GO:0004252);; Biological Process: proteolysis (GO:0006508);;	--	--	--	Peptidase inhibitor I9	--	PREDICTED: cucumisin-like [Glycine max]
Glyma.02G252200	[O]	Posttranslational modification, protein turnover, chaperones	Molecular Function: serine-type endopeptidase activity (GO:0004252);; Biological Process: proteolysis (GO:0006508);;	--	--	--	Subtilase family;; Peptidase inhibitor I9	Cucumisin (Precursor) OS=Cucumis melo (Muskmelon) PE=1 SV=1	Cucumisin [Glycine soja]
Glyma.02G252300	--	--	Molecular Function: serine-type endopeptidase activity (GO:0004252);; Biological Process: proteolysis (GO:0006508);;	--	--	--	Peptidase inhibitor I9;; Subtilase family	Cucumisin (Precursor) OS=Cucumis melo (Muskmelon) PE=1 SV=1	PREDICTED: cucumisin-like [Glycine max]
Glyma.02G252400	--	--	Molecular Function: 2-alkenal reductase [NAD(P)] activity (GO:0032440);; Molecular Function: protein dimerization activity (GO:0046983);; Biological Process: oxidation-reduction process (GO:0055114);;	--	--	--	Helix-loop-helix DNA-binding domain	Transcription factor bHLH93 GN=K21L13.16 OS=Arabidopsis thaliana (Mouse-ear cress) PE=1 SV=1	Transcription factor bHLH93 [Glycine soja]
Glyma.02G252500	--	--	--	--	--	--	--	--	PREDICTED: vitellogenin-2-like isoform X1 [Glycine max]
Glyma.02G252600	--	--	Molecular Function: Rho guanyl-nucleotide exchange factor activity (GO:0005089);; Biological Process: positive regulation of GTPase activity (GO:0043547);;	--	--	--	PRONE (Plant-specific Rop nucleotide exchanger)	Rop guanine nucleotide exchange factor 5 GN=ROPGEF5 OS=Arabidopsis thaliana (Mouse-ear cress) PE=2 SV=1	PREDICTED: rop guanine nucleotide exchange factor 5-like [Glycine max]
Glyma.02G252700	--	--	--	--	--	--	--	--	PREDICTED: uncharacterized protein LOC100816574 [Glycine max]
Glyma.02G252800	[O]	Posttranslational modification, protein turnover, chaperones	--	--	[O]	Posttranslational modification, protein turnover, chaperones	Hsp20/alpha crystallin family	18.2 kDa class I heat shock protein GN=HSP18.2 OS=Medicago sativa (Alfalfa) PE=2 SV=1	unknown [Glycine max]
Glyma.02G252900	--	--	--	--	--	--	Protein of unknown function (DUF620)	--	uncharacterized protein LOC100815870 [Glycine max]
Glyma.02G253000	--	--	Molecular Function: zinc ion binding (GO:0008270);;	--	[A]	RNA processing and modification	RING-variant domain	--	PREDICTED: uncharacterized protein LOC100816407 [Glycine max]
Glyma.02G253100	[KAD]	--	Molecular Function: DNA binding (GO:0003677);; Molecular Function: chromatin binding (GO:0003682);;	K09422|1e-86|vvi:100240975|hypothetical protein LOC100240975	[K]	Transcription	Myb-like DNA-binding domain;; Myb-like DNA-binding domain	Transcription factor MYB44 GN=K8K14.2 OS=Arabidopsis thaliana (Mouse-ear cress) PE=2 SV=1	PREDICTED: transcription factor MYB104-like [Glycine max]
Glyma.02G253200	--	--	Cellular Component: integral component of membrane (GO:0016021);;	--	[E]	Amino acid transport and metabolism	Transmembrane amino acid transporter protein	Proline transporter 1 GN=PROT1 OS=Arabidopsis thaliana (Mouse-ear cress) PE=1 SV=1	PREDICTED: proline transporter 1-like isoform X1 [Glycine max]
Glyma.02G253300	--	--	--	--	[S]	Function unknown	Yos1-like	--	PREDICTED: immediate early response 3-interacting protein 1 isoform X1 [Glycine max]
Glyma.02G253400	--	--	Biological Process: metabolic process (GO:0008152);; Molecular Function: transferase activity, transferring glycosyl groups (GO:0016757);;	--	--	--	GDP-fucose protein O-fucosyltransferase	Uncharacterized protein At1g04910 GN=At1g04910 OS=Arabidopsis thaliana (Mouse-ear cress) PE=2 SV=1	DUF246 domain-containing protein [Glycine soja]
Glyma.02G253500	[J]	Translation, ribosomal structure and biogenesis	Molecular Function: structural constituent of ribosome (GO:0003735);; Cellular Component: ribosome (GO:0005840);; Biological Process: translation (GO:0006412);;	--	[J]	Translation, ribosomal structure and biogenesis	Ribosomal protein L35Ae	60S ribosomal protein L35a-3 GN=RPL35AC OS=Arabidopsis thaliana (Mouse-ear cress) PE=3 SV=1	uncharacterized protein LOC100305997 [Glycine max]
Glyma.02G253600	--	--	Biological Process: carbohydrate transport (GO:0008643);; Cellular Component: integral component of membrane (GO:0016021);;	--	[GE]	--	Triose-phosphate Transporter family;; UAA transporter family;; EamA-like transporter family	Probable sugar phosphate/phosphate translocator At3g11320 GN=At3g11320 OS=Arabidopsis thaliana (Mouse-ear cress) PE=2 SV=1	uncharacterized protein LOC100817995 [Glycine max]
Glyma.02G253700	--	--	Molecular Function: zinc ion binding (GO:0008270);;	--	[TZ]	--	LIM domain	LIM domain-containing protein WLIM2a {ECO:0000305} OS=Arabidopsis thaliana (Mouse-ear cress) PE=1 SV=1	Pollen-specific protein SF3 [Glycine soja]
Glyma.02G253800	--	--	Molecular Function: hydrolase activity, hydrolyzing O-glycosyl compounds (GO:0004553);; Biological Process: carbohydrate metabolic process (GO:0005975);;	--	--	--	Glycosyl hydrolases family 17	Glucan endo-1,3-beta-glucosidase 2 (Precursor) GN=At1g66250 OS=Arabidopsis thaliana (Mouse-ear cress) PE=1 SV=2	hypothetical protein PHAVU_008G227100g [Phaseolus vulgaris]
Glyma.02G253900	--	--	Molecular Function: acid phosphatase activity (GO:0003993);; Biological Process: dephosphorylation (GO:0016311);;	--	--	--	HAD superfamily, subfamily IIIB (Acid phosphatase)	Uncharacterized protein At2g39920 GN=At2g39920 OS=Arabidopsis thaliana (Mouse-ear cress) PE=2 SV=2	PREDICTED: uncharacterized protein LOC100500131 isoform X1 [Glycine max]
Glyma.02G254000	[F]	Nucleotide transport and metabolism	Molecular Function: N6-(1,2-dicarboxyethyl)AMP AMP-lyase (fumarate-forming) activity (GO:0004018);; Biological Process: 'de novo' IMP biosynthetic process (GO:0006189);; Biological Process: 'de novo' AMP biosynthetic process (GO:0044208);; Molecular Function: (S)-2-(5-amino-1-(5-phospho-D-ribosyl)imidazole-4-carboxamido)succinate AMP-lyase (fumarate-forming) activity (GO:0070626);;	K01756|0.0|pop:POPTR_1091918|adenylosuccinate lyase (EC:4.3.2.2)	[F]	Nucleotide transport and metabolism	Lyase;; Adenylosuccinate lyase C-terminal	--	PREDICTED: adenylosuccinate lyase-like [Glycine max]
Glyma.02G254100	--	--	--	--	--	--	Polyketide cyclase / dehydrase and lipid transport;; Polyketide cyclase / dehydrase and lipid transport	--	hypothetical protein glysoja_037526 [Glycine soja]
Glyma.02G254200	--	--	Molecular Function: DNA binding (GO:0003677);; Molecular Function: chromatin binding (GO:0003682);; Cellular Component: nucleus (GO:0005634);;	--	[O]	Posttranslational modification, protein turnover, chaperones	Myb-like DNA-binding domain;; Myb-like DNA-binding domain	Transcription factor DIVARICATA GN=DIVARICATA OS=Antirrhinum majus (Garden snapdragon) PE=2 SV=1	PREDICTED: MYB transcription factor MYB83 isoform X1 [Glycine max]
Glyma.02G254300	--	--	Biological Process: response to molecule of bacterial origin (GO:0002237);; Biological Process: response to insect (GO:0009625);; Biological Process: shade avoidance (GO:0009641);; Biological Process: jasmonic acid and ethylene-dependent systemic resistance (GO:0009861);; Biological Process: jasmonic acid mediated signaling pathway (GO:0009867);; Biological Process: regulation of flower developme…	K13463|0.0|vvi:100254771|hypothetical protein LOC100254771	[R]	General function prediction only	--	Coronatine-insensitive protein 1 GN=T28M21.10 OS=Arabidopsis thaliana (Mouse-ear cress) PE=1 SV=1	Coronatine-insensitive protein 1 [Glycine soja]
Glyma.02G254400	--	--	--	--	--	--	--	--	hypothetical protein glysoja_037523 [Glycine soja]
Glyma.02G254500	--	--	Cellular Component: signal peptidase complex (GO:0005787);; Biological Process: signal peptide processing (GO:0006465);; Molecular Function: peptidase activity (GO:0008233);; Cellular Component: integral component of membrane (GO:0016021);;	K12947|1e-106|pop:POPTR_724536|hypothetical protein	--	--	Microsomal signal peptidase 25 kDa subunit (SPC25)	Probable signal peptidase complex subunit 2 GN=At2g39960 OS=Arabidopsis thaliana (Mouse-ear cress) PE=2 SV=1	Putative signal peptidase complex subunit 2 [Glycine soja]
Glyma.02G254600	--	--	Cellular Component: cytoplasm (GO:0005737);; Biological Process: metabolic process (GO:0008152);; Molecular Function: shikimate O-hydroxycinnamoyltransferase activity (GO:0047172);; Molecular Function: anthranilate N-benzoyltransferase activity (GO:0047672);; Biological Process: response to karrikin (GO:0080167);;	--	--	--	Transferase family	Uncharacterized acetyltransferase At3g50280 GN=At3g50280 OS=Arabidopsis thaliana (Mouse-ear cress) PE=3 SV=1	PREDICTED: uncharacterized acetyltransferase At3g50280 [Glycine max]
Glyma.02G254700	--	--	--	--	--	--	--	--	PREDICTED: uncharacterized protein LOC100779091 [Glycine max]
Glyma.02G254800	--	--	Molecular Function: DNA binding (GO:0003677);; Cellular Component: nucleus (GO:0005634);;	--	--	--	Homeobox domain	WUSCHEL-related homeobox 5 GN=WOX5 OS=Arabidopsis thaliana (Mouse-ear cress) PE=2 SV=1	PREDICTED: WUSCHEL-related homeobox 5-like [Glycine max]
Glyma.02G254900	[R]	General function prediction only	Biological Process: formation of translation preinitiation complex (GO:0001731);; Molecular Function: translation initiation factor activity (GO:0003743);; Cellular Component: eukaryotic translation initiation factor 3 complex (GO:0005852);; Biological Process: regulation of translational initiation (GO:0006446);; Cellular Component: eukaryotic 43S preinitiation complex (GO:0016282);; Cellular Co…	K03249|1e-169|rcu:RCOM_0592110|eukaryotic translation initiation factor 3f, eif3f, putative	[J]	Translation, ribosomal structure and biogenesis	JAB1/Mov34/MPN/PAD-1 ubiquitin protease;; Maintenance of mitochondrial structure and function	Eukaryotic translation initiation factor 3 subunit F {ECO:0000255|HAMAP-Rule:MF_03005} GN=TIF3F1 OS=Arabidopsis thaliana (Mouse-ear cress) PE=1 SV=1	PREDICTED: eukaryotic translation initiation factor 3 subunit F-like [Glycine max]
Glyma.02G255000	[G]	Carbohydrate transport and metabolism	Molecular Function: transporter activity (GO:0005215);; Biological Process: transport (GO:0006810);; Cellular Component: integral component of membrane (GO:0016021);;	--	[G]	Carbohydrate transport and metabolism	Major intrinsic protein	Probable aquaporin PIP-type 7a GN=TRG-31 OS=Pisum sativum (Garden pea) PE=2 SV=2	PREDICTED: probable aquaporin PIP-type 7a-like [Glycine max]
Glyma.02G255100	--	--	Molecular Function: glucuronyl-galactosyl-proteoglycan 4-alpha-N-acetylglucosaminyltransferase activity (GO:0001888);; Cellular Component: endosome (GO:0005768);; Cellular Component: trans-Golgi network (GO:0005802);; Biological Process: glycosaminoglycan biosynthetic process (GO:0006024);; Biological Process: response to bacterium (GO:0009617);; Biological Process: phloem or xylem histogenesis (…	K02367|0.0|rcu:RCOM_0592150|Exostosin-2, putative (EC:2.4.1.223)	[GMW]	--	Glycosyl transferase family 64 domain	Glycosyltransferase family 64 protein C4 {ECO:0000303|PubMed:24905498} OS=Arabidopsis thaliana (Mouse-ear cress) PE=2 SV=1	PREDICTED: exostosin-2-like [Glycine max]
Glyma.02G255200	--	--	--	--	--	--	Tetratricopeptide repeat	--	PREDICTED: uncharacterized protein LOC100775399 [Glycine max]
Glyma.02G255400	[K]	Transcription	--	--	--	--	Hs1pro-1 protein C-terminus;; Hs1pro-1 N-terminus	Nematode resistance protein-like HSPRO2 GN=HSPRO2 OS=Arabidopsis thaliana (Mouse-ear cress) PE=1 SV=1	nematode resistance HS1pro1 protein [Glycine max]
Glyma.02G255500	[J]	Translation, ribosomal structure and biogenesis	Molecular Function: structural constituent of ribosome (GO:0003735);; Cellular Component: ribosome (GO:0005840);; Biological Process: translational elongation (GO:0006414);; Biological Process: ribosome biogenesis (GO:0042254);;	K02941|1e-176|vvi:100250067|hypothetical protein LOC100250067	[J]	Translation, ribosomal structure and biogenesis	Ribosomal protein L10	60S acidic ribosomal protein P0 OS=Glycine max (Soybean) PE=1 SV=1	60S acidic ribosomal protein P0 [Glycine max]
Glyma.02G255600	[J]	Translation, ribosomal structure and biogenesis	Biological Process: DNA catabolic process, endonucleolytic (GO:0000737);; Molecular Function: structural constituent of ribosome (GO:0003735);; Molecular Function: DNA-(apurinic or apyrimidinic site) lyase activity (GO:0003906);; Cellular Component: ribosome (GO:0005840);; Biological Process: translational elongation (GO:0006414);; Biological Process: ribosome biogenesis (GO:0042254);;	K02941|1e-44|rcu:RCOM_0592410|60S acidic ribosomal protein P0, putative (EC:4.2.99.18)	[J]	Translation, ribosomal structure and biogenesis	Ribosomal protein L10	60S acidic ribosomal protein P0 OS=Glycine max (Soybean) PE=1 SV=1	PREDICTED: 60S acidic ribosomal protein P0-like isoform X1 [Glycine max]
Glyma.02G255700	--	--	Molecular Function: SNAP receptor activity (GO:0005484);; Cellular Component: endosome (GO:0005768);; Cellular Component: Golgi apparatus (GO:0005794);; Biological Process: intracellular protein transport (GO:0006886);; Biological Process: intra-Golgi vesicle-mediated transport (GO:0006891);; Cellular Component: cell plate (GO:0009504);; Cellular Component: integral component of membrane (GO:0016…	K08490|1e-168|rcu:RCOM_0592560|syntaxin, putative	[U]	Intracellular trafficking, secretion, and vesicular transport	SNARE domain;; Syntaxin	Syntaxin-31 GN=SYP31 OS=Arabidopsis thaliana (Mouse-ear cress) PE=1 SV=1	PREDICTED: syntaxin-31-like [Glycine max]
Glyma.02G255800	--	--	Cellular Component: plasma membrane (GO:0005886);; Biological Process: amino acid transport (GO:0006865);; Biological Process: auxin-activated signaling pathway (GO:0009734);; Molecular Function: symporter activity (GO:0015293);; Cellular Component: integral component of membrane (GO:0016021);; Biological Process: transmembrane transport (GO:0055085);;	K13946|0.0|vvi:100267240|hypothetical protein LOC100267240	[E]	Amino acid transport and metabolism	Transmembrane amino acid transporter protein	Auxin transporter-like protein 1 GN=LAX1 OS=Medicago truncatula (Barrel medic) PE=2 SV=1	PREDICTED: auxin transporter-like protein 1-like isoform X1 [Glycine max]
Glyma.02G255900	--	--	Molecular Function: histone-lysine N-methyltransferase activity (GO:0018024);; Biological Process: histone lysine methylation (GO:0034968);;	--	--	--	Ubiquitin-binding WIYLD domain	--	PREDICTED: uncharacterized protein LOC102663843 [Glycine max]
Glyma.02G256000	[M]	Cell wall/membrane/envelope biogenesis	Molecular Function: metalloendopeptidase activity (GO:0004222);; Biological Process: proteolysis (GO:0006508);; Biological Process: phosphatidylglycerol biosynthetic process (GO:0006655);; Cellular Component: chloroplast thylakoid membrane (GO:0009535);; Biological Process: embryo development ending in seed dormancy (GO:0009793);; Biological Process: thylakoid membrane organization (GO:0010027);;…	--	--	--	Peptidase family M50	Probable zinc metalloprotease EGY2, chloroplastic (Precursor) GN=EGY2 OS=Oryza sativa subsp. indica (Rice) PE=3 SV=1	PREDICTED: uncharacterized protein LOC100778800 [Glycine max]
Glyma.02G256100	[S]	Function unknown	Molecular Function: kinase activity (GO:0016301);; Biological Process: phosphorylation (GO:0016310);; Molecular Function: 2-alkenal reductase [NAD(P)] activity (GO:0032440);; Biological Process: oxidation-reduction process (GO:0055114);;	--	--	--	Leucine Rich repeats (2 copies);; Leucine rich repeat;; Leucine Rich Repeat;; Leucine rich repeat N-terminal domain	Putative receptor-like protein kinase At3g47110 (Precursor) GN=At3g47110 OS=Arabidopsis thaliana (Mouse-ear cress) PE=3 SV=1	hypothetical protein PHAVU_008G224900g [Phaseolus vulgaris]
Glyma.02G256200	--	--	Molecular Function: transferase activity, transferring phosphorus-containing groups (GO:0016772);;	--	--	--	Leucine rich repeat;; Protein tyrosine kinase;; Leucine Rich Repeat	Probable LRR receptor-like serine/threonine-protein kinase At3g47570 (Precursor) GN=At3g47570 OS=Arabidopsis thaliana (Mouse-ear cress) PE=2 SV=1	Putative LRR receptor-like serine/threonine-protein kinase [Glycine soja]
Glyma.02G256300	--	--	Molecular Function: phospholipid binding (GO:0005543);;	--	--	--	PH domain;; Pleckstrin homology domain	Pleckstrin homology domain-containing protein 1 GN=PH1 OS=Arabidopsis thaliana (Mouse-ear cress) PE=2 SV=2	PREDICTED: pleckstrin homology domain-containing protein 1-like [Glycine max]
Glyma.02G256400	--	--	--	--	--	--	--	--	hypothetical protein glysoja_034181 [Glycine soja]
Glyma.02G256500	--	--	Biological Process: metabolic process (GO:0008152);; Molecular Function: transferase activity (GO:0016740);;	--	[O]	Posttranslational modification, protein turnover, chaperones	Xylanase inhibitor N-terminal;; Xylanase inhibitor C-terminal;; Eukaryotic aspartyl protease	Protein ASPARTIC PROTEASE IN GUARD CELL 2 (Precursor) GN=ASPG2 OS=Arabidopsis thaliana (Mouse-ear cress) PE=2 SV=1	PREDICTED: protein ASPARTIC PROTEASE IN GUARD CELL 2-like [Glycine max]
Glyma.02G256600	--	--	--	--	--	--	--	Nuclear pore complex protein NUP62 {ECO:0000303|PubMed:21189294} OS=Arabidopsis thaliana (Mouse-ear cress) PE=1 SV=1	PREDICTED: flocculation protein FLO11-like isoform X1 [Glycine max]
Glyma.02G256700	--	--	--	--	[R]	General function prediction only	Yippee zinc-binding/DNA-binding /Mis18, centromere assembly	Protein yippee-like OS=Solanum tuberosum (Potato) PE=2 SV=1	PREDICTED: protein yippee-like isoform 1 [Glycine max]
Glyma.02G256800	[Q]	Secondary metabolites biosynthesis, transport and catabolism	Biological Process: polysaccharide biosynthetic process (GO:0000271);; Molecular Function: monooxygenase activity (GO:0004497);; Molecular Function: iron ion binding (GO:0005506);; Molecular Function: electron carrier activity (GO:0009055);; Biological Process: multidimensional cell growth (GO:0009825);; Biological Process: positive regulation of flower development (GO:0009911);; Biological Proce…	K09588|0.0|pop:POPTR_656234|CYP90A6v1	[QI]	--	Cytochrome P450	Cytochrome P450 90A1 GN=MJJ3.9 OS=Arabidopsis thaliana (Mouse-ear cress) PE=2 SV=1	PREDICTED: cytochrome P450 90A1 [Glycine max]
Glyma.02G256900	--	--	--	--	[R]	General function prediction only	--	--	PREDICTED: uncharacterized protein LOC100781838 isoform X1 [Glycine max]
Glyma.02G257000	--	--	Molecular Function: phosphatidylinositol phospholipase C activity (GO:0004435);; Molecular Function: signal transducer activity (GO:0004871);; Biological Process: lipid catabolic process (GO:0016042);; Biological Process: intracellular signal transduction (GO:0035556);;	K05857|0.0|pop:POPTR_803315|phosphoinositide phospholipase C (EC:3.1.4.11)	[T]	Signal transduction mechanisms	Phosphatidylinositol-specific phospholipase C, X domain;; Phosphatidylinositol-specific phospholipase C, Y domain;; C2 domain;; Phosphoinositide-specific phospholipase C, efhand-like	Phosphoinositide phospholipase C 6 GN=PLC6 OS=Arabidopsis thaliana (Mouse-ear cress) PE=2 SV=2	PREDICTED: phosphoinositide phospholipase C 6-like [Glycine max]
Glyma.02G257100	--	--	Molecular Function: phosphatidylinositol phospholipase C activity (GO:0004435);; Molecular Function: signal transducer activity (GO:0004871);; Biological Process: lipid catabolic process (GO:0016042);; Biological Process: intracellular signal transduction (GO:0035556);;	K05857|0.0|pop:POPTR_803315|phosphoinositide phospholipase C (EC:3.1.4.11)	[T]	Signal transduction mechanisms	Phosphatidylinositol-specific phospholipase C, X domain;; Phosphatidylinositol-specific phospholipase C, Y domain;; C2 domain;; Phosphoinositide-specific phospholipase C, efhand-like	Phosphoinositide phospholipase C 6 GN=PLC6 OS=Arabidopsis thaliana (Mouse-ear cress) PE=2 SV=2	PREDICTED: phosphoinositide phospholipase C 6-like [Glycine max]
Glyma.02G257200	--	--	Molecular Function: phosphatidylinositol phospholipase C activity (GO:0004435);; Molecular Function: signal transducer activity (GO:0004871);; Biological Process: lipid catabolic process (GO:0016042);; Biological Process: intracellular signal transduction (GO:0035556);;	K05857|0.0|vvi:100241574|hypothetical protein LOC100241574	[T]	Signal transduction mechanisms	Phosphatidylinositol-specific phospholipase C, X domain;; Phosphatidylinositol-specific phospholipase C, Y domain;; Phosphoinositide-specific phospholipase C, efhand-like;; C2 domain	Phosphoinositide phospholipase C 2 GN=PLC2 OS=Arabidopsis thaliana (Mouse-ear cress) PE=1 SV=1	phosphatidylinositol-specific phospholipase C [Glycine max]
Glyma.02G257300	[RTKL]	--	Molecular Function: protein serine/threonine kinase activity (GO:0004674);; Molecular Function: ATP binding (GO:0005524);; Biological Process: protein phosphorylation (GO:0006468);;	--	[T]	Signal transduction mechanisms	Protein kinase domain;; Protein tyrosine kinase;; Regulator of chromosome condensation (RCC1) repeat	Putative serine/threonine-protein kinase-like protein CCR3 (Precursor) GN=F27K19.130 OS=Arabidopsis thaliana (Mouse-ear cress) PE=2 SV=1	PREDICTED: putative serine/threonine-protein kinase-like protein CCR3-like [Glycine max]
Glyma.02G257400	--	--	Molecular Function: phosphoprotein phosphatase activity (GO:0004721);; Biological Process: dephosphorylation (GO:0016311);; Biological Process: root hair elongation (GO:0048767);;	--	[K]	Transcription	NLI interacting factor-like phosphatase	Mitochondrial import inner membrane translocase subunit TIM50 (Precursor) GN=TIM50 OS=Phytophthora infestans (Potato late blight fungus) PE=2 SV=1	CTD small phosphatase-like protein 2 [Glycine soja]
Glyma.02G257600	[RTKL]	--	Molecular Function: protein serine/threonine kinase activity (GO:0004674);; Molecular Function: protein serine/threonine/tyrosine kinase activity (GO:0004712);; Molecular Function: ATP binding (GO:0005524);; Biological Process: protein phosphorylation (GO:0006468);;	--	[R]	General function prediction only	Protein kinase domain;; Protein tyrosine kinase	Serine/threonine-protein kinase AFC2 GN=AFC2 OS=Arabidopsis thaliana (Mouse-ear cress) PE=1 SV=1	PREDICTED: dual specificity protein kinase pom1-like [Glycine max]
Glyma.02G257700	[R]	General function prediction only	Molecular Function: iron ion binding (GO:0005506);; Molecular Function: methyltransferase activity (GO:0008168);; Molecular Function: oxidoreductase activity, acting on paired donors, with incorporation or reduction of molecular oxygen, 2-oxoglutarate as one donor, and incorporation of one atom each of oxygen into both donors (GO:0016706);; Biological Process: methylation (GO:0032259);; Biologica…	--	[QR]	--	non-haem dioxygenase in morphine synthesis N-terminal;; 2OG-Fe(II) oxygenase superfamily	Leucoanthocyanidin dioxygenase GN=ANS OS=Malus domestica (Apple) PE=2 SV=1	PREDICTED: leucoanthocyanidin dioxygenase-like [Glycine max]
Glyma.02G257800	--	--	Molecular Function: nucleic acid binding (GO:0003676);; Cellular Component: plasma membrane (GO:0005886);; Molecular Function: methyltransferase activity (GO:0008168);; Cellular Component: integral component of membrane (GO:0016021);; Biological Process: vesicle-mediated transport (GO:0016192);; Biological Process: methylation (GO:0032259);;	K08518|0.0|vvi:100250143|hypothetical protein LOC100250143	[U]	Intracellular trafficking, secretion, and vesicular transport	WD domain, G-beta repeat;; Synaptobrevin;; PQQ-like domain;; PQQ-like domain;; Lethal giant larvae(Lgl) like, C-terminal	--	PREDICTED: uncharacterized protein LOC100777534 isoform X1 [Glycine max]
Glyma.02G257900	--	--	--	--	--	--	non-haem dioxygenase in morphine synthesis N-terminal	1-aminocyclopropane-1-carboxylate oxidase 2 GN=ACO2 OS=Doritaenopsis sp. (Moth orchid) PE=2 SV=1	PREDICTED: uncharacterized protein LOC100785042 [Glycine max]
Glyma.02G258000	--	--	Biological Process: response to freezing (GO:0050826);;	--	--	--	GDSL/SGNH-like Acyl-Esterase family found in Pmr5 and Cas1p;; PMR5 N terminal Domain	Protein ESKIMO 1 GN=F27K19.170 OS=Arabidopsis thaliana (Mouse-ear cress) PE=1 SV=1	hypothetical protein glysoja_034196 [Glycine soja]
Glyma.02G258100	--	--	Cellular Component: anaphase-promoting complex (GO:0005680);; Biological Process: double-strand break repair (GO:0006302);; Biological Process: mitotic recombination (GO:0006312);; Biological Process: sister chromatid cohesion (GO:0007062);; Biological Process: mitotic nuclear division (GO:0007067);; Biological Process: synapsis (GO:0007129);; Biological Process: reciprocal meiotic recombination …	K03348|0.0|pop:POPTR_765590|hypothetical protein	[DO]	--	Anaphase-promoting complex subunit 1;; Proteasome/cyclosome repeat	Anaphase-promoting complex subunit 1 GN=MOP10.10 OS=Arabidopsis thaliana (Mouse-ear cress) PE=2 SV=1	PREDICTED: anaphase-promoting complex subunit 1-like isoform X2 [Glycine max]
Glyma.02G258200	--	--	Molecular Function: structural molecule activity (GO:0005198);; Biological Process: intracellular protein transport (GO:0006886);; Biological Process: vesicle-mediated transport (GO:0016192);; Cellular Component: clathrin coat of trans-Golgi network vesicle (GO:0030130);; Cellular Component: clathrin coat of coated pit (GO:0030132);;	K04646|0.0|rcu:RCOM_0838580|clathrin heavy chain, putative	[U]	Intracellular trafficking, secretion, and vesicular transport	Region in Clathrin and VPS;; Clathrin propeller repeat;; Clathrin-H-link;; Clathrin, heavy-chain linker	Clathrin heavy chain 2 OS=Arabidopsis thaliana (Mouse-ear cress) PE=1 SV=1	PREDICTED: clathrin heavy chain 2-like [Glycine max]
Glyma.02G258300	--	--	Biological Process: transcription, DNA-templated (GO:0006351);; Molecular Function: protein dimerization activity (GO:0046983);;	--	--	--	Helix-loop-helix DNA-binding domain	Transcription factor bHLH51 GN=T7M7.8 OS=Arabidopsis thaliana (Mouse-ear cress) PE=2 SV=1	PREDICTED: transcription factor bHLH51-like [Glycine max]
Glyma.02G258400	--	--	--	--	[R]	General function prediction only	--	Vegetative cell wall protein gp1 (Precursor) GN=GP1 OS=Chlamydomonas reinhardtii (Chlamydomonas smithii) PE=1 SV=1	PREDICTED: elastin-like [Glycine max]
Glyma.02G258500	--	--	--	--	--	--	--	Glycine-rich cell wall structural protein (Precursor) GN=GRP OS=Hordeum vulgare (Barley) PE=2 SV=1	hypothetical protein glysoja_004242 [Glycine soja]
Glyma.02G258600	--	--	Biological Process: response to oxidative stress (GO:0006979);; Cellular Component: integral component of membrane (GO:0016021);;	--	--	--	--	--	PREDICTED: uncharacterized protein LOC100780743 [Glycine max]
Glyma.02G258700	--	--	--	--	--	--	--	--	hypothetical protein glysoja_004240 [Glycine soja]
Glyma.02G258800	[U]	Intracellular trafficking, secretion, and vesicular transport	Cellular Component: endoplasmic reticulum membrane (GO:0005789);; Biological Process: protein targeting (GO:0006605);; Molecular Function: P-P-bond-hydrolysis-driven protein transmembrane transporter activity (GO:0015450);; Cellular Component: integral component of membrane (GO:0016021);; Biological Process: protein transmembrane transport (GO:0071806);;	K07342|1e-42|osa:4341707|Os06g0653900	[U]	Intracellular trafficking, secretion, and vesicular transport	SecE/Sec61-gamma subunits of protein translocation complex	Protein transport protein Sec61 subunit gamma OS=Oryza sativa subsp. japonica (Rice) PE=3 SV=1	PREDICTED: protein transport protein Sec61 subunit gamma-like [Glycine max]
Glyma.02G258900	[U]	Intracellular trafficking, secretion, and vesicular transport	Cellular Component: endoplasmic reticulum membrane (GO:0005789);; Biological Process: protein targeting (GO:0006605);; Molecular Function: P-P-bond-hydrolysis-driven protein transmembrane transporter activity (GO:0015450);; Cellular Component: integral component of membrane (GO:0016021);; Biological Process: protein transmembrane transport (GO:0071806);;	K07342|6e-43|osa:4341707|Os06g0653900	[U]	Intracellular trafficking, secretion, and vesicular transport	SecE/Sec61-gamma subunits of protein translocation complex	Protein transport protein Sec61 subunit gamma OS=Oryza sativa subsp. japonica (Rice) PE=3 SV=1	PREDICTED: protein transport protein Sec61 subunit gamma-like [Glycine max]
Glyma.02G259000	[E]	Amino acid transport and metabolism	Molecular Function: indole-3-glycerol-phosphate synthase activity (GO:0004425);; Biological Process: tryptophan metabolic process (GO:0006568);; Cellular Component: chloroplast thylakoid (GO:0009534);; Cellular Component: chloroplast stroma (GO:0009570);;	K01609|0.0|rcu:RCOM_0691140|tryptophan biosynthesis protein, trpc, putative (EC:4.1.1.48)	[E]	Amino acid transport and metabolism	Indole-3-glycerol phosphate synthase	Indole-3-glycerol phosphate synthase, chloroplastic (Precursor) GN=At2g04400 OS=Arabidopsis thaliana (Mouse-ear cress) PE=2 SV=2	PREDICTED: indole-3-glycerol phosphate synthase, chloroplastic-like [Glycine max]
Glyma.02G259100	--	--	--	--	--	--	Weak chloroplast movement under blue light	WEB family protein At2g40480 GN=At2g40480 OS=Arabidopsis thaliana (Mouse-ear cress) PE=2 SV=1	PREDICTED: WEB family protein At2g40480-like [Glycine max]
Glyma.02G259200	--	--	--	--	--	--	--	--	uncharacterized protein LOC100527370 [Glycine max]
Glyma.02G259300	--	--	Molecular Function: peroxidase activity (GO:0004601);; Cellular Component: cell wall (GO:0005618);; Cellular Component: Golgi apparatus (GO:0005794);; Cellular Component: cytosol (GO:0005829);; Biological Process: response to oxidative stress (GO:0006979);; Molecular Function: heme binding (GO:0020037);; Biological Process: hydrogen peroxide catabolic process (GO:0042744);; Molecular Function: me…	K00430|1e-178|pop:POPTR_836853|hypothetical protein	--	--	Peroxidase	Peroxidase 4 {ECO:0000250|UniProtKB:Q42578} (Precursor) OS=Vitis vinifera (Grape) PE=1 SV=1	PREDICTED: peroxidase 4-like [Glycine max]
Glyma.02G259400	[E]	Amino acid transport and metabolism	Molecular Function: transporter activity (GO:0005215);; Biological Process: transport (GO:0006810);; Cellular Component: integral component of membrane (GO:0016021);;	--	[E]	Amino acid transport and metabolism	POT family	Protein NRT1/ PTR FAMILY 5.1 GN=NPF5.1 OS=Arabidopsis thaliana (Mouse-ear cress) PE=2 SV=2	Putative peptide/nitrate transporter [Glycine soja]
Glyma.02G259500	--	--	Molecular Function: peroxidase activity (GO:0004601);; Cellular Component: extracellular region (GO:0005576);; Biological Process: response to oxidative stress (GO:0006979);; Molecular Function: heme binding (GO:0020037);; Molecular Function: metal ion binding (GO:0046872);; Biological Process: oxidation-reduction process (GO:0055114);;	K00430|2e-73|vvi:100257005|Peroxidase 4	--	--	Peroxidase	Peroxidase 4 {ECO:0000250|UniProtKB:Q42578} (Precursor) OS=Vitis vinifera (Grape) PE=1 SV=1	Peroxidase 4 [Glycine soja]
Glyma.02G259600	--	--	--	--	--	--	--	--	hypothetical protein glysoja_004230 [Glycine soja]
Glyma.02G259700	--	--	Cellular Component: integral component of membrane (GO:0016021);;	--	--	--	Hypoxia induced protein conserved region	--	unknown [Glycine max]
Glyma.02G259800	--	--	Molecular Function: protein dimerization activity (GO:0046983);;	--	--	--	--	Transcription factor bHLH93 GN=K21L13.16 OS=Arabidopsis thaliana (Mouse-ear cress) PE=1 SV=1	uncharacterized protein LOC100306253 [Glycine max]
Glyma.02G260000	--	--	--	--	--	--	Tubby C 2	Protein LURP1 GN=LURP1 OS=Arabidopsis thaliana (Mouse-ear cress) PE=2 SV=1	PREDICTED: protein LURP1-like [Glycine max]
Glyma.02G260100	--	--	Cellular Component: integral component of membrane (GO:0016021);;	--	[E]	Amino acid transport and metabolism	Transmembrane amino acid transporter protein;; Tryptophan/tyrosine permease family	Probable amino acid permease 7 GN=AAP7 OS=Arabidopsis thaliana (Mouse-ear cress) PE=2 SV=1	PREDICTED: probable sodium-coupled neutral amino acid transporter 6-like isoform X1 [Glycine max]
Glyma.02G260200	--	--	Cellular Component: integral component of membrane (GO:0016021);;	--	[E]	Amino acid transport and metabolism	Transmembrane amino acid transporter protein	--	PREDICTED: probable sodium-coupled neutral amino acid transporter 6-like isoform X2 [Glycine max]
Glyma.02G260300	--	--	Cellular Component: integral component of membrane (GO:0016021);;	--	[E]	Amino acid transport and metabolism	Transmembrane amino acid transporter protein;; Tryptophan/tyrosine permease family	Lysine histidine transporter-like 5 GN=At1g71680 OS=Arabidopsis thaliana (Mouse-ear cress) PE=2 SV=2	PREDICTED: putative sodium-coupled neutral amino acid transporter 10-like isoform X2 [Glycine max]
Glyma.02G260400	--	--	Biological Process: intracellular protein transport (GO:0006886);;	--	[U]	Intracellular trafficking, secretion, and vesicular transport	Soluble NSF attachment protein, SNAP;; Tetratricopeptide repeat	Alpha-soluble NSF attachment protein 2 GN=F18O21_150 OS=Arabidopsis thaliana (Mouse-ear cress) PE=1 SV=1	PREDICTED: alpha-soluble NSF attachment protein 2-like isoform X1 [Glycine max]
Glyma.02G260500	--	--	--	--	--	--	PLAC8 family;; Protein of unknown function (DUF2985)	--	PREDICTED: uncharacterized protein LOC100795088 isoform X1 [Glycine max]
Glyma.02G260600	[L]	Replication, recombination and repair	Molecular Function: nucleic acid binding (GO:0003676);; Molecular Function: nuclease activity (GO:0004518);; Molecular Function: aminoacyl-tRNA ligase activity (GO:0004812);; Molecular Function: ATP binding (GO:0005524);; Biological Process: tRNA aminoacylation for protein translation (GO:0006418);; Biological Process: nucleic acid phosphodiester bond hydrolysis (GO:0090305);;	--	--	--	Staphylococcal nuclease homologue	Staphylococcal-like nuclease CAN2 GN=CAN2 OS=Arabidopsis thaliana (Mouse-ear cress) PE=1 SV=1	Putative 38.1 kDa protein [Glycine soja]
Glyma.02G260700	--	--	Biological Process: metal ion transport (GO:0030001);; Molecular Function: metal ion binding (GO:0046872);;	--	[P]	Inorganic ion transport and metabolism	Heavy-metal-associated domain	Copper transport protein CCH GN=CCH OS=Arabidopsis thaliana (Mouse-ear cress) PE=1 SV=1	PREDICTED: copper transport protein CCH-like, partial [Glycine max]
Glyma.02G260800	--	--	--	--	--	--	--	Protein EARLY RESPONSIVE TO DEHYDRATION 15 OS=Arabidopsis thaliana (Mouse-ear cress) PE=1 SV=1	PREDICTED: protein EARLY RESPONSIVE TO DEHYDRATION 15-like [Glycine max]
Glyma.02G260900	--	--	Molecular Function: prephenate dehydrogenase (NADP+) activity (GO:0004665);; Biological Process: tyrosine biosynthetic process (GO:0006571);; Molecular Function: prephenate dehydrogenase activity (GO:0008977);; Molecular Function: arogenate dehydrogenase (NADP+) activity (GO:0033730);; Biological Process: oxidation-reduction process (GO:0055114);;	--	[E]	Amino acid transport and metabolism	--	Arogenate dehydrogenase 1, chloroplastic (Precursor) GN=TYRAAT1 OS=Arabidopsis thaliana (Mouse-ear cress) PE=1 SV=1	Arogenate dehydrogenase 1, chloroplastic [Glycine soja]
Glyma.02G261000	--	--	--	--	--	--	--	--	PREDICTED: uncharacterized protein LOC100782905 [Glycine max]
Glyma.02G261100	[UT]	--	--	--	[U]	Intracellular trafficking, secretion, and vesicular transport	PRA1 family protein	PRA1 family protein B3 GN=K18I23.19 OS=Arabidopsis thaliana (Mouse-ear cress) PE=1 SV=1	PREDICTED: PRA1 family protein B3-like [Glycine max]
Glyma.02G261200	--	--	Biological Process: protein folding (GO:0006457);; Biological Process: response to heat (GO:0009408);; Biological Process: response to high light intensity (GO:0009644);; Biological Process: polar nucleus fusion (GO:0010197);; Biological Process: response to endoplasmic reticulum stress (GO:0034976);; Biological Process: response to hydrogen peroxide (GO:0042542);; Biological Process: cell divisi…	--	[S]	Function unknown	D123	--	Cell division cycle protein 123 like [Glycine soja]
Glyma.02G261300	--	--	Biological Process: protein folding (GO:0006457);; Biological Process: response to heat (GO:0009408);; Biological Process: response to high light intensity (GO:0009644);; Biological Process: polar nucleus fusion (GO:0010197);; Biological Process: response to endoplasmic reticulum stress (GO:0034976);; Biological Process: response to hydrogen peroxide (GO:0042542);; Biological Process: cell divisi…	--	[S]	Function unknown	D123	--	hypothetical protein PHAVU_009G217100g [Phaseolus vulgaris]
Glyma.02G261400	[S]	Function unknown	Molecular Function: transmembrane receptor protein tyrosine kinase activity (GO:0004714);; Molecular Function: ATP binding (GO:0005524);; Cellular Component: integral component of membrane (GO:0016021);; Biological Process: peptidyl-tyrosine phosphorylation (GO:0018108);;	--	--	--	Protein kinase domain;; Protein tyrosine kinase;; Leucine Rich repeats (2 copies);; Leucine rich repeat;; Leucine Rich Repeat;; Leucine Rich repeat;; Leucine rich repeat N-terminal domain	Probably inactive leucine-rich repeat receptor-like protein kinase IMK2 (Precursor) GN=IMK2 OS=Arabidopsis thaliana (Mouse-ear cress) PE=1 SV=1	PREDICTED: probably inactive leucine-rich repeat receptor-like protein kinase IMK2-like [Glycine max]
Glyma.02G261500	[UR]	--	Molecular Function: phosphatidylinositol binding (GO:0035091);;	--	[U]	Intracellular trafficking, secretion, and vesicular transport	Vps5 C terminal like;; PX domain	Sorting nexin 2B GN=SNX2B OS=Arabidopsis thaliana (Mouse-ear cress) PE=1 SV=1	PREDICTED: sorting nexin 2B-like [Glycine max]
Glyma.02G261600	[Q]	Secondary metabolites biosynthesis, transport and catabolism	Molecular Function: copper ion binding (GO:0005507);; Molecular Function: L-ascorbate oxidase activity (GO:0008447);; Biological Process: lignin catabolic process (GO:0046274);; Cellular Component: apoplast (GO:0048046);; Molecular Function: hydroquinone:oxygen oxidoreductase activity (GO:0052716);; Biological Process: oxidation-reduction process (GO:0055114);;	--	[Q]	Secondary metabolites biosynthesis, transport and catabolism	Multicopper oxidase;; Multicopper oxidase;; Multicopper oxidase	Laccase-5 (Precursor) GN=T3G21.14 OS=Arabidopsis thaliana (Mouse-ear cress) PE=2 SV=1	PREDICTED: laccase-5-like [Glycine max]
Glyma.02G261700	--	--	Molecular Function: DNA binding (GO:0003677);; Molecular Function: transcription factor activity, sequence-specific DNA binding (GO:0003700);; Cellular Component: nucleus (GO:0005634);; Biological Process: regulation of transcription, DNA-templated (GO:0006355);;	--	--	--	AP2 domain	Dehydration-responsive element-binding protein 2C OS=Arabidopsis thaliana (Mouse-ear cress) PE=2 SV=2	dehydration-responsive element-binding protein 2C-like [Glycine max]
Glyma.02G261800	[KL]	--	Molecular Function: DNA binding (GO:0003677);; Molecular Function: helicase activity (GO:0004386);; Molecular Function: ATP binding (GO:0005524);; Biological Process: metabolic process (GO:0008152);;	--	[L]	Replication, recombination and repair	SNF2 family N-terminal domain;; Type III restriction enzyme, res subunit;; Helicase conserved C-terminal domain	SNF2 domain-containing protein CLASSY 2 GN=F7C8.10 OS=Arabidopsis thaliana (Mouse-ear cress) PE=1 SV=1	Helicase ARIP4 [Glycine soja]
Glyma.02G261900	--	--	Molecular Function: peroxidase activity (GO:0004601);; Biological Process: response to oxidative stress (GO:0006979);; Molecular Function: heme binding (GO:0020037);; Biological Process: oxidation-reduction process (GO:0055114);;	K14496|1e-90|vvi:100267073|hypothetical protein LOC100267073	--	--	Polyketide cyclase / dehydrase and lipid transport;; Pathogenesis-related protein Bet v I family;; Polyketide cyclase / dehydrase and lipid transport	Abscisic acid receptor PYL4 GN=T19C21.20 OS=Arabidopsis thaliana (Mouse-ear cress) PE=1 SV=1	PREDICTED: abscisic acid receptor PYL4-like [Glycine max]
Glyma.02G262000	--	--	--	--	--	--	Reverse transcriptase-like	--	hypothetical protein glysoja_004210 [Glycine soja]
Glyma.02G262100	--	--	--	--	--	--	GDSL/SGNH-like Acyl-Esterase family found in Pmr5 and Cas1p;; PMR5 N terminal Domain	Protein trichome birefringence-like 33 GN=TBL33 OS=Arabidopsis thaliana (Mouse-ear cress) PE=2 SV=1	hypothetical protein PHAVU_008G220700g [Phaseolus vulgaris]
Glyma.02G262200	--	--	Cellular Component: cytoplasm (GO:0005737);; Biological Process: carbohydrate metabolic process (GO:0005975);; Molecular Function: mannosyl-glycoprotein endo-beta-N-acetylglucosaminidase activity (GO:0033925);;	K01227|8e-79|vvi:100265715|hypothetical protein LOC100265715	[R]	General function prediction only	Glycosyl hydrolase family 85	--	PREDICTED: cytosolic endo-beta-N-acetylglucosaminidase-like [Glycine max]
Glyma.02G262300	[G]	Carbohydrate transport and metabolism	Cellular Component: cytoplasm (GO:0005737);; Biological Process: carbohydrate metabolic process (GO:0005975);; Molecular Function: mannosyl-glycoprotein endo-beta-N-acetylglucosaminidase activity (GO:0033925);;	K01227|0.0|vvi:100265715|hypothetical protein LOC100265715	[R]	General function prediction only	Glycosyl hydrolase family 85	--	PREDICTED: cytosolic endo-beta-N-acetylglucosaminidase-like [Glycine max]
Glyma.02G262400	--	--	Molecular Function: DNA binding (GO:0003677);; Molecular Function: carbamoyl-phosphate synthase (glutamine-hydrolyzing) activity (GO:0004088);; Biological Process: metabolic process (GO:0008152);; Biological Process: leaf morphogenesis (GO:0009965);;	--	--	--	Protein of unknown function DUF260	LOB domain-containing protein 12 GN=T27E13.13 OS=Arabidopsis thaliana (Mouse-ear cress) PE=2 SV=2	PREDICTED: LOB domain-containing protein 12-like [Glycine max]
Glyma.02G262500	[P]	Inorganic ion transport and metabolism	Molecular Function: ferroxidase activity (GO:0004322);; Biological Process: iron ion transport (GO:0006826);; Biological Process: cellular iron ion homeostasis (GO:0006879);; Molecular Function: ferric iron binding (GO:0008199);; Cellular Component: chloroplast (GO:0009507);; Biological Process: oxidation-reduction process (GO:0055114);;	K00522|1e-130|pop:POPTR_822369|hypothetical protein	[P]	Inorganic ion transport and metabolism	Ferritin-like domain	Ferritin-4, chloroplastic (Precursor) OS=Glycine max (Soybean) PE=1 SV=2	PREDICTED: ferritin-4, chloroplastic-like isoform X2 [Glycine max]
Glyma.02G262600	--	--	Molecular Function: enzyme inhibitor activity (GO:0004857);; Cellular Component: ribosome (GO:0005840);; Molecular Function: pectinesterase activity (GO:0030599);; Biological Process: negative regulation of catalytic activity (GO:0043086);;	--	--	--	Plant invertase/pectin methylesterase inhibitor	--	PREDICTED: uncharacterized protein LOC100789816 [Glycine max]
Glyma.02G262700	--	--	Molecular Function: enzyme inhibitor activity (GO:0004857);; Cellular Component: ribosome (GO:0005840);; Molecular Function: pectinesterase activity (GO:0030599);; Biological Process: negative regulation of catalytic activity (GO:0043086);;	--	--	--	Plant invertase/pectin methylesterase inhibitor	Pectinesterase inhibitor 2 (Precursor) GN=PMEI2 OS=Arabidopsis thaliana (Mouse-ear cress) PE=1 SV=1	PREDICTED: uncharacterized protein LOC100789816 [Glycine max]
Glyma.02G262800	--	--	Molecular Function: enzyme inhibitor activity (GO:0004857);; Cellular Component: ribosome (GO:0005840);; Molecular Function: pectinesterase activity (GO:0030599);; Biological Process: negative regulation of catalytic activity (GO:0043086);;	--	--	--	Plant invertase/pectin methylesterase inhibitor	--	PREDICTED: uncharacterized protein LOC100789816 [Glycine max]
Glyma.02G262900	--	--	Molecular Function: enzyme inhibitor activity (GO:0004857);; Cellular Component: ribosome (GO:0005840);; Molecular Function: pectinesterase activity (GO:0030599);; Biological Process: negative regulation of catalytic activity (GO:0043086);;	--	--	--	Plant invertase/pectin methylesterase inhibitor	--	PREDICTED: uncharacterized protein LOC100789816 [Glycine max]
Glyma.02G263000	--	--	Molecular Function: enzyme inhibitor activity (GO:0004857);; Cellular Component: ribosome (GO:0005840);; Molecular Function: pectinesterase activity (GO:0030599);; Biological Process: negative regulation of catalytic activity (GO:0043086);;	--	--	--	Plant invertase/pectin methylesterase inhibitor	--	PREDICTED: uncharacterized protein LOC100789816 [Glycine max]
Glyma.02G263100	--	--	Molecular Function: enzyme inhibitor activity (GO:0004857);; Cellular Component: ribosome (GO:0005840);; Molecular Function: pectinesterase activity (GO:0030599);; Biological Process: negative regulation of catalytic activity (GO:0043086);;	--	--	--	Plant invertase/pectin methylesterase inhibitor	--	PREDICTED: uncharacterized protein LOC100789816 [Glycine max]
Glyma.02G263200	[J]	Translation, ribosomal structure and biogenesis	Molecular Function: structural constituent of ribosome (GO:0003735);; Cellular Component: ribosome (GO:0005840);; Biological Process: translation (GO:0006412);; Molecular Function: rRNA binding (GO:0019843);;	K02987|0.0|pop:POPTR_837007|40S ribosomal protein S4 (RPS4A)	[J]	Translation, ribosomal structure and biogenesis	Ribosomal family S4e;; RS4NT (NUC023) domain;; KOW motif;; S4 domain	40S ribosomal protein S4-1 GN=RPS4A OS=Arabidopsis thaliana (Mouse-ear cress) PE=2 SV=1	40S ribosomal S4 protein [Glycine max]
Glyma.02G263300	--	--	--	--	--	--	PLAC8 family	Cell number regulator 13 GN=CNR13 OS=Zea mays (Maize) PE=2 SV=1	PREDICTED: protein MID1-COMPLEMENTING ACTIVITY 1-like isoform X1 [Glycine max]
Glyma.02G263400	--	--	Cellular Component: vacuole (GO:0005773);;	--	--	--	Peptide N-acetyl-beta-D-glucosaminyl asparaginase amidase A	Peptide-N4-(N-acetyl-beta-glucosaminyl)asparagine amidase A heavy chain OS=Prunus dulcis (Almond) PE=1 SV=2	PREDICTED: peptide-N4-(N-acetyl-beta-glucosaminyl)asparagine amidase A-like [Glycine max]
Glyma.02G263500	--	--	Molecular Function: methyltransferase activity (GO:0008168);; Biological Process: methylation (GO:0032259);;	--	--	--	Putative S-adenosyl-L-methionine-dependent methyltransferase;; Methyltransferase domain;; Methyltransferase domain	Probable methyltransferase PMT23 GN=At2g40280 OS=Arabidopsis thaliana (Mouse-ear cress) PE=2 SV=2	PREDICTED: probable methyltransferase PMT23-like [Glycine max]
Glyma.02G263600	[R]	General function prediction only	--	--	[R]	General function prediction only	Ankyrin repeats (3 copies);; Ankyrin repeat;; Ankyrin repeats (many copies);; Ankyrin repeats (many copies);; MSP (Major sperm protein) domain;; Ankyrin repeat	Protein S-acyltransferase 24 GN=F5O24.240 OS=Arabidopsis thaliana (Mouse-ear cress) PE=2 SV=1	PREDICTED: ankyrin repeat, PH and SEC7 domain containing protein secG-like [Glycine max]
Glyma.02G263700	--	--	Cellular Component: nuclear chromosome (GO:0000228);; Biological Process: DNA metabolic process (GO:0006259);; Biological Process: meiosis I (GO:0007127);; Biological Process: single-organism metabolic process (GO:0044710);; Biological Process: meiotic chromosome segregation (GO:0045132);; Biological Process: chromosome organization involved in meiotic cell cycle (GO:0070192);;	--	[D]	Cell cycle control, cell division, chromosome partitioning	N terminus of Rad21 / Rec8 like protein;; Conserved region of Rad21 / Rec8 like protein	Sister chromatid cohesion 1 protein 1 GN=MOP10.3 OS=Arabidopsis thaliana (Mouse-ear cress) PE=2 SV=2	PREDICTED: sister chromatid cohesion 1 protein 1-like isoform X1 [Glycine max]
Glyma.02G263800	--	--	Molecular Function: protein binding (GO:0005515);; Molecular Function: electron carrier activity (GO:0009055);; Molecular Function: protein disulfide oxidoreductase activity (GO:0015035);; Biological Process: cell redox homeostasis (GO:0045454);; Biological Process: oxidation-reduction process (GO:0055114);;	--	[O]	Posttranslational modification, protein turnover, chaperones	Glutaredoxin	Uncharacterized protein At3g28850 GN=At3g28850 OS=Arabidopsis thaliana (Mouse-ear cress) PE=3 SV=1	PREDICTED: uncharacterized protein At5g39865-like [Glycine max]
Glyma.02G263900	[RTKL]	--	Molecular Function: protein kinase activity (GO:0004672);; Molecular Function: ATP binding (GO:0005524);; Biological Process: protein phosphorylation (GO:0006468);; Cellular Component: integral component of membrane (GO:0016021);;	--	--	--	Protein tyrosine kinase;; Protein kinase domain;; Leucine rich repeat N-terminal domain	Probable LRR receptor-like serine/threonine-protein kinase MRH1 (Precursor) GN=MRH1 OS=Arabidopsis thaliana (Mouse-ear cress) PE=2 SV=1	PREDICTED: probable LRR receptor-like serine/threonine-protein kinase MRH1-like [Glycine max]
Glyma.02G264000	[M]	Cell wall/membrane/envelope biogenesis	Cellular Component: outer membrane (GO:0019867);;	--	[R]	General function prediction only	Surface antigen;; Surface antigen variable number repeat	--	PREDICTED: sorting and assembly machinery component 50 homolog [Glycine max]
Glyma.02G264100	--	--	Cellular Component: extracellular region (GO:0005576);; Biological Process: lipid catabolic process (GO:0016042);; Molecular Function: hydrolase activity, acting on ester bonds (GO:0016788);;	--	--	--	GDSL-like Lipase/Acylhydrolase	GDSL esterase/lipase At2g40250 (Precursor) GN=At2g40250 OS=Arabidopsis thaliana (Mouse-ear cress) PE=2 SV=1	PREDICTED: GDSL esterase/lipase At2g40250-like [Glycine max]
Glyma.02G264200	--	--	Molecular Function: ubiquitin-protein transferase activity (GO:0004842);; Biological Process: protein ubiquitination (GO:0016567);; Molecular Function: ligase activity (GO:0016874);;	--	[S]	Function unknown	Armadillo/beta-catenin-like repeat;; HEAT repeats;; U-box domain	U-box domain-containing protein 17 GN=PUB17 OS=Arabidopsis thaliana (Mouse-ear cress) PE=2 SV=1	PREDICTED: U-box domain-containing protein 13-like [Glycine max]
Glyma.02G264300	--	--	Biological Process: metabolic process (GO:0008152);; Molecular Function: transferase activity (GO:0016740);;	--	[O]	Posttranslational modification, protein turnover, chaperones	Xylanase inhibitor N-terminal;; Xylanase inhibitor C-terminal;; Eukaryotic aspartyl protease	Protein ASPARTIC PROTEASE IN GUARD CELL 2 (Precursor) GN=ASPG2 OS=Arabidopsis thaliana (Mouse-ear cress) PE=2 SV=1	Aspartic proteinase nepenthesin-2 [Glycine soja]
Glyma.02G264400	--	--	Biological Process: metabolic process (GO:0008152);; Molecular Function: transferase activity (GO:0016740);;	--	[O]	Posttranslational modification, protein turnover, chaperones	Xylanase inhibitor N-terminal;; Xylanase inhibitor C-terminal;; Eukaryotic aspartyl protease	Protein ASPARTIC PROTEASE IN GUARD CELL 2 (Precursor) GN=ASPG2 OS=Arabidopsis thaliana (Mouse-ear cress) PE=2 SV=1	PREDICTED: protein ASPARTIC PROTEASE IN GUARD CELL 2-like [Glycine max]
Glyma.02G264500	--	--	Molecular Function: carbamoyl-phosphate synthase (glutamine-hydrolyzing) activity (GO:0004088);; Biological Process: metabolic process (GO:0008152);;	--	--	--	Protein of unknown function DUF260	LOB domain-containing protein 21 OS=Arabidopsis thaliana (Mouse-ear cress) PE=2 SV=1	LOB domain-containing protein 21 [Glycine soja]
Glyma.02G264600	[K]	Transcription	Biological Process: metabolic process (GO:0008152);; Molecular Function: transferase activity, transferring acyl groups other than amino-acyl groups (GO:0016747);;	--	--	--	Transferase family	Taxadien-5-alpha-ol O-acetyltransferase OS=Taxus wallichiana var. chinensis (Chinese yew) PE=2 SV=1	PREDICTED: taxadien-5-alpha-ol O-acetyltransferase-like [Glycine max]
Glyma.02G264700	--	--	Molecular Function: DNA binding (GO:0003677);; Molecular Function: transcription factor activity, sequence-specific DNA binding (GO:0003700);; Cellular Component: nucleus (GO:0005634);; Biological Process: regulation of transcription, DNA-templated (GO:0006355);; Biological Process: response to stress (GO:0006950);; Biological Process: signal transduction (GO:0007165);; Biological Process: respon…	K09286|5e-89|rcu:RCOM_0839150|hypothetical protein	--	--	AP2 domain	Ethylene-responsive transcription factor ABI4 GN=At2g40220 OS=Arabidopsis thaliana (Mouse-ear cress) PE=1 SV=2	SGR [Glycine max]
Glyma.02G264800	[O]	Posttranslational modification, protein turnover, chaperones	Biological Process: metabolic process (GO:0008152);; Molecular Function: zinc ion binding (GO:0008270);;	--	[O]	Posttranslational modification, protein turnover, chaperones	Ring finger domain;; RING-H2 zinc finger;; Zinc finger, C3HC4 type (RING finger)	RING-H2 finger protein ATL66 GN=ATL66 OS=Arabidopsis thaliana (Mouse-ear cress) PE=2 SV=1	PREDICTED: RING-H2 finger protein ATL66-like [Glycine max]
Glyma.02G264900	[KAD]	--	Molecular Function: DNA binding (GO:0003677);; Molecular Function: chromatin binding (GO:0003682);;	--	[K]	Transcription	Myb-like DNA-binding domain;; Myb-like DNA-binding domain	Transcription factor MYB44 GN=K8K14.2 OS=Arabidopsis thaliana (Mouse-ear cress) PE=2 SV=1	PREDICTED: transcription factor MYB44 [Glycine max]
Glyma.02G265000	--	--	Biological Process: metabolic process (GO:0008152);;	--	--	--	--	Leucine-rich repeat extensin-like protein 3 (Precursor) GN=LRX3 OS=Arabidopsis thaliana (Mouse-ear cress) PE=1 SV=1	PREDICTED: glycine-rich cell wall structural protein-like [Glycine max]
Glyma.02G265100	--	--	Molecular Function: iron ion binding (GO:0005506);; Cellular Component: mitochondrial intermembrane space (GO:0005758);; Molecular Function: electron carrier activity (GO:0009055);; Molecular Function: heme binding (GO:0020037);; Biological Process: oxidation-reduction process (GO:0055114);; Cellular Component: respiratory chain (GO:0070469);;	K08738|1e-11|zma:100383938|hypothetical protein LOC100383938	[C]	Energy production and conversion	--	Nodulin-16 (Precursor) GN=GMN16 OS=Glycine max (Soybean) PE=2 SV=1	PREDICTED: uncharacterized protein LOC100795607 isoform X5 [Glycine max]
Glyma.02G265200	--	--	Biological Process: nodulation (GO:0009877);; Cellular Component: peribacteroid membrane (GO:0043661);;	--	--	--	--	Nodulin-16 (Precursor) GN=GMN16 OS=Glycine max (Soybean) PE=2 SV=1	PREDICTED: uncharacterized protein LOC100527599 isoform X1 [Glycine max]
Glyma.02G265300	--	--	Biological Process: nodulation (GO:0009877);; Cellular Component: peribacteroid membrane (GO:0043661);;	--	--	--	--	Nodulin-16 (Precursor) GN=GMN16 OS=Glycine max (Soybean) PE=2 SV=1	Nodulin-16 [Glycine soja]
Glyma.02G265400	--	--	--	--	--	--	Glycine rich protein family	Glycine-rich protein 3 (Precursor) GN=GRP3 OS=Arabidopsis thaliana (Mouse-ear cress) PE=1 SV=1	hypothetical protein PHAVU_008G217200g [Phaseolus vulgaris]
Glyma.02G265500	--	--	Cellular Component: membrane (GO:0016020);;	--	--	--	--	Nodulin-16 (Precursor) GN=GMN16 OS=Glycine max (Soybean) PE=2 SV=1	nodulin 24 [Glycine max]
Glyma.02G265600	--	--	Biological Process: single-organism process (GO:0044699);;	--	[O]	Posttranslational modification, protein turnover, chaperones	--	Thioredoxin-like protein CXXS1 GN=CXXS1 OS=Arabidopsis thaliana (Mouse-ear cress) PE=2 SV=2	PREDICTED: thioredoxin-like protein CXXS1-like [Cicer arietinum]
Glyma.02G265700	--	--	--	--	--	--	--	Leucine-rich repeat extensin-like protein 3 (Precursor) GN=LRX3 OS=Arabidopsis thaliana (Mouse-ear cress) PE=1 SV=1	PREDICTED: ATP-dependent RNA helicase A-like isoform X1 [Glycine max]
Glyma.02G265800	--	--	--	--	--	--	Glycine rich protein family	Formin-like protein 5 GN=P0453E05.107 OS=Oryza sativa subsp. japonica (Rice) PE=2 SV=2	PREDICTED: glycine-rich cell wall structural protein-like [Glycine max]
Glyma.02G265900	--	--	Molecular Function: calcium ion binding (GO:0005509);;	--	--	--	EF-hand domain pair;; EF hand;; EF hand;; EF-hand domain;; EF-hand domain pair	--	uncharacterized protein LOC100500687 [Glycine max]
Glyma.02G266000	--	--	--	--	--	--	IQ calmodulin-binding motif	Protein IQ-DOMAIN 1 GN=IQD1 OS=Arabidopsis thaliana (Mouse-ear cress) PE=1 SV=1	Protein IQ-DOMAIN 1 [Glycine soja]
Glyma.02G266100	--	--	Cellular Component: vacuolar membrane (GO:0005774);; Molecular Function: lipid binding (GO:0008289);;	--	[V]	Defense mechanisms	LBP / BPI / CETP family, N-terminal domain	Putative BPI/LBP family protein At1g04970 (Precursor) GN=At1g04970 OS=Arabidopsis thaliana (Mouse-ear cress) PE=2 SV=1	Putative BPI/LBP family protein [Glycine soja]
Glyma.02G266200	[R]	General function prediction only	Biological Process: rRNA processing (GO:0006364);; Cellular Component: chloroplast (GO:0009507);; Biological Process: chloroplast organization (GO:0009658);; Biological Process: mRNA modification (GO:0016556);; Biological Process: tRNA 3'-trailer cleavage, endonucleolytic (GO:0034414);; Molecular Function: 3'-tRNA processing endoribonuclease activity (GO:0042781);; Molecular Function: metal ion b…	--	--	--	Beta-lactamase superfamily domain;; Metallo-beta-lactamase superfamily	Ribonuclease Z, chloroplastic (Precursor) GN=CPZ OS=Arabidopsis thaliana (Mouse-ear cress) PE=2 SV=1	PREDICTED: ribonuclease Z, chloroplastic-like [Glycine max]
Glyma.02G266300	[T]	Signal transduction mechanisms	Biological Process: inactivation of MAPK activity (GO:0000188);; Molecular Function: protein tyrosine phosphatase activity (GO:0004725);; Cellular Component: nucleus (GO:0005634);; Biological Process: phosphatidylinositol biosynthetic process (GO:0006661);; Molecular Function: protein tyrosine/serine/threonine phosphatase activity (GO:0008138);; Biological Process: auxin-activated signaling pathw…	K04459|1e-157|vvi:100249965|hypothetical protein LOC100249965	[V]	Defense mechanisms	Dual specificity phosphatase, catalytic domain	Protein-tyrosine-phosphatase IBR5 GN=T1O3.4 OS=Arabidopsis thaliana (Mouse-ear cress) PE=1 SV=1	PREDICTED: protein-tyrosine-phosphatase IBR5-like [Glycine max]
Glyma.02G266400	--	--	Biological Process: fatty acid biosynthetic process (GO:0006633);; Cellular Component: membrane (GO:0016020);; Molecular Function: transferase activity, transferring acyl groups other than amino-acyl groups (GO:0016747);;	--	--	--	FAE1/Type III polyketide synthase-like protein	3-ketoacyl-CoA synthase 1 GN=T25K16.11 OS=Arabidopsis thaliana (Mouse-ear cress) PE=2 SV=1	3-ketoacyl-CoA synthase 1 [Glycine soja]
Glyma.02G266500	--	--	--	--	--	--	--	--	hypothetical protein glysoja_004173 [Glycine soja]
Glyma.02G266600	--	--	Molecular Function: hydrolase activity, acting on ester bonds (GO:0016788);; Molecular Function: 9,9'-dicis-carotene:quinone oxidoreductase activity (GO:0052886);; Molecular Function: 7,9,9'-tricis-neurosporene:quinone oxidoreductase activity (GO:0052887);; Biological Process: 9,9'-di-cis-zeta-carotene desaturation to 7,9,7',9'-tetra-cis-lycopene (GO:0052889);; Biological Process: oxidation-reduc…	--	--	--	GDSL-like Lipase/Acylhydrolase	GDSL esterase/lipase At2g42990 (Precursor) GN=At2g42990 OS=Arabidopsis thaliana (Mouse-ear cress) PE=2 SV=1	uncharacterized protein LOC100809260 precursor [Glycine max]
Glyma.02G266700	--	--	Molecular Function: hydrolase activity, acting on ester bonds (GO:0016788);; Molecular Function: 9,9'-dicis-carotene:quinone oxidoreductase activity (GO:0052886);; Molecular Function: 7,9,9'-tricis-neurosporene:quinone oxidoreductase activity (GO:0052887);; Biological Process: 9,9'-di-cis-zeta-carotene desaturation to 7,9,7',9'-tetra-cis-lycopene (GO:0052889);; Biological Process: oxidation-reduc…	--	--	--	GDSL-like Lipase/Acylhydrolase	GDSL esterase/lipase At2g04570 (Precursor) GN=At2g04570 OS=Arabidopsis thaliana (Mouse-ear cress) PE=2 SV=1	PREDICTED: GDSL esterase/lipase At2g04570-like isoform 1 [Glycine max]
Glyma.02G266800	--	--	Cellular Component: condensed chromosome kinetochore (GO:0000777);; Cellular Component: nucleus (GO:0005634);; Cellular Component: cytoplasm (GO:0005737);; Cellular Component: spindle (GO:0005819);; Biological Process: chromosome segregation (GO:0007059);; Biological Process: mitotic nuclear division (GO:0007067);; Biological Process: cell division (GO:0051301);;	K11578|0.0|vvi:100265420|hypothetical protein LOC100265420	[D]	Cell cycle control, cell division, chromosome partitioning	Centromere/kinetochore Zw10	Centromere/kinetochore protein zw10 homolog OS=Arabidopsis thaliana (Mouse-ear cress) PE=1 SV=1	PREDICTED: centromere/kinetochore protein zw10 homolog isoform X1 [Glycine max]
Glyma.02G266900	[OC]	--	Molecular Function: protein disulfide isomerase activity (GO:0003756);; Biological Process: protein folding (GO:0006457);; Biological Process: cell redox homeostasis (GO:0045454);;	K09584|0.0|pop:POPTR_246818|hypothetical protein	[O]	Posttranslational modification, protein turnover, chaperones	Thioredoxin;; Thioredoxin-like domain;; Thioredoxin-like domain;; Thioredoxin-like;; Thioredoxin-like;; Thioredoxin;; Thioredoxin domain	Protein disulfide isomerase-like 2-3 (Precursor) OS=Oryza sativa subsp. japonica (Rice) PE=2 SV=1	PREDICTED: protein disulfide isomerase-like 2-3-like [Glycine max]
Glyma.02G267000	--	--	--	--	--	--	--	--	hypothetical protein glysoja_004168 [Glycine soja]
Glyma.02G267100	[R]	General function prediction only	Molecular Function: sterol esterase activity (GO:0004771);; Biological Process: lipid catabolic process (GO:0016042);;	--	[I]	Lipid transport and metabolism	Partial alpha/beta-hydrolase lipase region;; Alpha/beta hydrolase family;; Alpha/beta hydrolase family;; alpha/beta hydrolase fold	Triacylglycerol lipase 2 (Precursor) GN=LIP2 OS=Arabidopsis thaliana (Mouse-ear cress) PE=2 SV=1	PREDICTED: triacylglycerol lipase 2-like isoform X1 [Glycine max]
Glyma.02G267200	--	--	--	--	--	--	--	--	hypothetical protein glysoja_032088 [Glycine soja]
Glyma.02G267300	--	--	Cellular Component: nucleus (GO:0005634);; Biological Process: regulation of mitotic cell cycle (GO:0007346);; Molecular Function: zinc ion binding (GO:0008270);; Biological Process: leaf morphogenesis (GO:0009965);; Biological Process: seed dormancy process (GO:0010162);; Biological Process: vegetative to reproductive phase transition of meristem (GO:0010228);; Biological Process: histone monoub…	K10696|0.0|vvi:100251829|hypothetical protein LOC100251829	[O]	Posttranslational modification, protein turnover, chaperones	--	E3 ubiquitin-protein ligase BRE1-like 2 GN=F7A10.17 OS=Arabidopsis thaliana (Mouse-ear cress) PE=2 SV=2	PREDICTED: E3 ubiquitin-protein ligase BRE1-like 2-like isoform X2 [Glycine max]
Glyma.02G267400	--	--	Molecular Function: DNA binding (GO:0003677);; Molecular Function: transcription factor activity, sequence-specific DNA binding (GO:0003700);; Cellular Component: nucleus (GO:0005634);; Biological Process: regulation of transcription, DNA-templated (GO:0006355);;	--	--	--	AP2 domain	Ethylene-responsive transcription factor 3 GN=ERF3 OS=Nicotiana tabacum (Common tobacco) PE=2 SV=1	PREDICTED: ethylene-responsive transcription factor 3 [Glycine max]
Glyma.02G267500	--	--	Biological Process: metabolic process (GO:0008152);; Molecular Function: transferase activity (GO:0016740);; Molecular Function: metal ion binding (GO:0046872);;	--	[R]	General function prediction only	Zinc finger C-x8-C-x5-C-x3-H type (and similar)	Zinc finger CCCH domain-containing protein 3 GN=At1g04990 OS=Arabidopsis thaliana (Mouse-ear cress) PE=2 SV=1	Zinc finger CCCH domain-containing protein 3 [Glycine soja]
Glyma.02G267600	--	--	Biological Process: carbohydrate metabolic process (GO:0005975);; Molecular Function: raffinose alpha-galactosidase activity (GO:0052692);;	--	[G]	Carbohydrate transport and metabolism	--	--	PREDICTED: uncharacterized protein LOC102665052 isoform X1 [Glycine max]
Glyma.02G267700	--	--	Molecular Function: alpha-galactosidase activity (GO:0004557);; Biological Process: metabolic process (GO:0008152);;	--	[G]	Carbohydrate transport and metabolism	--	Alpha-galactosidase 3 {ECO:0000303|PubMed:15034167} (Precursor) OS=Arabidopsis thaliana (Mouse-ear cress) PE=1 SV=1	PREDICTED: uncharacterized protein LOC100798270 [Glycine max]
Glyma.02G267800	[T]	Signal transduction mechanisms	Cellular Component: nuclear ubiquitin ligase complex (GO:0000152);; Molecular Function: ubiquitin-protein transferase activity (GO:0004842);; Cellular Component: cytoplasm (GO:0005737);; Biological Process: DNA repair (GO:0006281);; Molecular Function: zinc ion binding (GO:0008270);; Biological Process: red, far-red light phototransduction (GO:0009585);; Biological Process: shade avoidance (GO:00…	K10143|0.0|rcu:RCOM_0002700|ubiquitin ligase protein cop1, putative (EC:1.3.1.74)	--	--	WD domain, G-beta repeat;; Zinc finger, C3HC4 type (RING finger);; Zinc finger, C3HC4 type (RING finger);; zinc finger of C3HC4-type, RING;; Ring finger domain;; Zinc finger, C3HC4 type (RING finger);; U-box domain	E3 ubiquitin-protein ligase COP1 GN=COP1 OS=Pisum sativum (Garden pea) PE=2 SV=1	PREDICTED: E3 ubiquitin-protein ligase COP1-like [Glycine max]
Glyma.02G267900	--	--	Molecular Function: protein tyrosine phosphatase activity (GO:0004725);; Biological Process: peptidyl-tyrosine dephosphorylation (GO:0035335);;	--	[V]	Defense mechanisms	Tyrosine phosphatase family;; Tyrosine phosphatase family	Probable tyrosine-protein phosphatase At1g05000 GN=At1g05000 OS=Arabidopsis thaliana (Mouse-ear cress) PE=1 SV=1	PREDICTED: probable tyrosine-protein phosphatase At1g05000-like [Glycine max]
Glyma.02G268000	[R]	General function prediction only	Biological Process: ethylene biosynthetic process (GO:0009693);; Molecular Function: 1-aminocyclopropane-1-carboxylate oxidase activity (GO:0009815);; Biological Process: fruit ripening (GO:0009835);; Molecular Function: L-ascorbic acid binding (GO:0031418);; Molecular Function: naringenin 3-dioxygenase activity (GO:0045486);; Molecular Function: metal ion binding (GO:0046872);; Biological Proces…	--	[QR]	--	2OG-Fe(II) oxygenase superfamily	1-aminocyclopropane-1-carboxylate oxidase GN=ACO1 OS=Prunus mume (Japanese apricot) PE=2 SV=1	PREDICTED: 1-aminocyclopropane-1-carboxylate oxidase [Glycine max]
Glyma.02G268100	--	--	Biological Process: metabolic process (GO:0008152);; Molecular Function: transferase activity (GO:0016740);;	--	[R]	General function prediction only	Ankyrin repeats (3 copies);; Ankyrin repeat;; Ankyrin repeats (many copies);; Ankyrin repeat;; Ankyrin repeats (many copies)	Ankyrin repeat-containing protein At5g02620 GN=At5g02620 OS=Arabidopsis thaliana (Mouse-ear cress) PE=1 SV=1	PREDICTED: alpha-latroinsectotoxin-Lt1a-like [Glycine max]
Glyma.02G268200	[R]	General function prediction only	Molecular Function: 1-aminocyclopropane-1-carboxylate oxidase activity (GO:0009815);; Molecular Function: naringenin 3-dioxygenase activity (GO:0045486);; Molecular Function: metal ion binding (GO:0046872);; Biological Process: oxidation-reduction process (GO:0055114);;	K05933|0.0|vvi:100232928|ACO1	[QR]	--	2OG-Fe(II) oxygenase superfamily;; non-haem dioxygenase in morphine synthesis N-terminal	1-aminocyclopropane-1-carboxylate oxidase GN=ACO1 OS=Prunus mume (Japanese apricot) PE=2 SV=1	uncharacterized protein LOC100815336 [Glycine max]
Glyma.02G268300	--	--	--	--	[R]	General function prediction only	Ankyrin repeats (3 copies);; Domain of unknown function;; Ankyrin repeats (many copies);; Ankyrin repeat;; Ankyrin repeats (many copies);; Ankyrin repeat	Ankyrin repeat-containing protein At3g12360 GN=At3g12360 OS=Arabidopsis thaliana (Mouse-ear cress) PE=2 SV=1	PREDICTED: uncharacterized protein LOC100799322 isoform X2 [Glycine max]
Glyma.02G268400	[R]	General function prediction only	Molecular Function: 1-aminocyclopropane-1-carboxylate oxidase activity (GO:0009815);; Molecular Function: naringenin 3-dioxygenase activity (GO:0045486);; Molecular Function: metal ion binding (GO:0046872);; Biological Process: oxidation-reduction process (GO:0055114);;	--	[QR]	--	2OG-Fe(II) oxygenase superfamily	1-aminocyclopropane-1-carboxylate oxidase 1 GN=ACO1 OS=Petunia hybrida (Petunia) PE=1 SV=1	1-aminocyclopropane-1-carboxylate oxidase [Glycine soja]
Glyma.02G268500	--	--	Molecular Function: 1-aminocyclopropane-1-carboxylate oxidase activity (GO:0009815);; Molecular Function: naringenin 3-dioxygenase activity (GO:0045486);; Molecular Function: metal ion binding (GO:0046872);; Biological Process: oxidation-reduction process (GO:0055114);;	K05933|7e-44|vvi:100232928|ACO1	[QR]	--	non-haem dioxygenase in morphine synthesis N-terminal	1-aminocyclopropane-1-carboxylate oxidase GN=ACO1 OS=Prunus mume (Japanese apricot) PE=2 SV=1	uncharacterized protein LOC100819184 [Glycine max]
Glyma.02G268600	[R]	General function prediction only	Biological Process: receptor recycling (GO:0001881);; Cellular Component: multivesicular body (GO:0005771);; Cellular Component: Golgi apparatus (GO:0005794);; Biological Process: ubiquitin-dependent protein catabolic process (GO:0006511);; Biological Process: protein targeting to vacuole (GO:0006623);; Biological Process: photorespiration (GO:0009853);; Molecular Function: hydrolase activity, ac…	K07095|1e-134|pop:POPTR_727869|hypothetical protein	[U]	Intracellular trafficking, secretion, and vesicular transport	Calcineurin-like phosphoesterase superfamily domain;; Calcineurin-like phosphoesterase	Vacuolar protein sorting-associated protein 29 GN=At3g47810 OS=Arabidopsis thaliana (Mouse-ear cress) PE=2 SV=1	PREDICTED: vacuolar protein sorting-associated protein 29-like isoform X1 [Glycine max]
Glyma.02G268700	[S]	Function unknown	--	--	[S]	Function unknown	Protein of unknown function (DUF423)	--	uncharacterized protein LOC100816932 [Glycine max]
Glyma.02G268900	[S]	Function unknown	Biological Process: signal transduction (GO:0007165);; Molecular Function: ADP binding (GO:0043531);;	--	--	--	NB-ARC domain;; TIR domain;; TIR domain;; Leucine rich repeat;; Leucine Rich repeats (2 copies);; NACHT domain;; Leucine Rich Repeat	TMV resistance protein N GN=N OS=Nicotiana glutinosa (Tobacco) PE=1 SV=1	PREDICTED: TMV resistance protein N-like [Glycine max]
Glyma.02G269000	--	--	Molecular Function: hydrolase activity, hydrolyzing O-glycosyl compounds (GO:0004553);; Biological Process: carbohydrate metabolic process (GO:0005975);; Biological Process: pattern specification process (GO:0007389);; Biological Process: asymmetric cell division (GO:0008356);; Biological Process: regulation of cell size (GO:0008361);; Biological Process: auxin polar transport (GO:0009926);; Biol…	--	--	--	Glycosyl hydrolases family 17;; X8 domain	Glucan endo-1,3-beta-glucosidase 12 (Precursor) GN=At4g29360 OS=Arabidopsis thaliana (Mouse-ear cress) PE=1 SV=1	PREDICTED: glucan endo-1,3-beta-glucosidase 12-like [Glycine max]
Glyma.02G269100	--	--	Molecular Function: protein kinase activity (GO:0004672);; Molecular Function: ATP binding (GO:0005524);; Biological Process: protein phosphorylation (GO:0006468);; Cellular Component: integral component of membrane (GO:0016021);;	--	--	--	Leucine Rich repeats (2 copies);; Leucine rich repeat;; Leucine Rich Repeat	Probable LRR receptor-like serine/threonine-protein kinase At4g08850 (Precursor) GN=At4g08850 OS=Arabidopsis thaliana (Mouse-ear cress) PE=2 SV=3	PREDICTED: probable LRR receptor-like serine/threonine-protein kinase At4g08850-like isoform X2 [Glycine max]
Glyma.02G269200	[S]	Function unknown	Molecular Function: protein kinase activity (GO:0004672);; Molecular Function: ATP binding (GO:0005524);; Biological Process: protein phosphorylation (GO:0006468);; Cellular Component: integral component of membrane (GO:0016021);;	--	--	--	Protein kinase domain;; Protein tyrosine kinase;; Leucine Rich repeats (2 copies);; Leucine rich repeat;; Leucine Rich Repeat;; Leucine Rich repeat;; Leucine rich repeat N-terminal domain;; Leucine rich repeat	Probable LRR receptor-like serine/threonine-protein kinase At4g08850 (Precursor) GN=At4g08850 OS=Arabidopsis thaliana (Mouse-ear cress) PE=2 SV=3	PREDICTED: probable LRR receptor-like serine/threonine-protein kinase At4g08850-like [Glycine max]
Glyma.02G269300	--	--	Molecular Function: transporter activity (GO:0005215);; Cellular Component: plasmodesma (GO:0009506);; Cellular Component: integral component of membrane (GO:0016021);; Biological Process: transmembrane transport (GO:0055085);;	K14611|0.0|rcu:RCOM_1118530|purine permease, putative	[F]	Nucleotide transport and metabolism	Permease family	Nucleobase-ascorbate transporter 1 GN=NAT1 OS=Arabidopsis thaliana (Mouse-ear cress) PE=2 SV=1	PREDICTED: nucleobase-ascorbate transporter 1-like [Glycine max]
Glyma.02G269400	--	--	Cellular Component: extracellular region (GO:0005576);; Molecular Function: cellulase activity (GO:0008810);; Biological Process: cellulose catabolic process (GO:0030245);;	--	--	--	Glycosyl hydrolase family 9	Endoglucanase 11 (Precursor) GN=At2g32990 OS=Arabidopsis thaliana (Mouse-ear cress) PE=2 SV=1	PREDICTED: endoglucanase 11 [Glycine max]
Glyma.02G269500	--	--	Molecular Function: alkaline phosphatase activity (GO:0004035);; Biological Process: dephosphorylation (GO:0016311);;	K01113|0.0|pop:POPTR_715748|hypothetical protein	--	--	PhoD-like phosphatase	--	PREDICTED: uncharacterized protein LOC100801460 isoform X1 [Glycine max]
Glyma.02G269600	--	--	Molecular Function: protein kinase activity (GO:0004672);; Molecular Function: ATP binding (GO:0005524);; Biological Process: protein phosphorylation (GO:0006468);;	--	--	--	Protein kinase domain;; Protein tyrosine kinase;; LysM domain	Protein LYK5 (Precursor) GN=LYK5 OS=Arabidopsis thaliana (Mouse-ear cress) PE=2 SV=1	LYK8 [Glycine max]
Glyma.02G269700	[E]	Amino acid transport and metabolism	Molecular Function: symporter activity (GO:0015293);; Cellular Component: integral component of membrane (GO:0016021);; Biological Process: nitrate assimilation (GO:0042128);; Biological Process: transmembrane transport (GO:0055085);;	--	[E]	Amino acid transport and metabolism	POT family;; Major Facilitator Superfamily	Protein NRT1/ PTR FAMILY 6.4 GN=MIL23.23 OS=Arabidopsis thaliana (Mouse-ear cress) PE=1 SV=1	PREDICTED: nitrate transporter 1.3 [Glycine max]
Glyma.02G269800	[J]	Translation, ribosomal structure and biogenesis	Molecular Function: structural constituent of ribosome (GO:0003735);; Biological Process: DNA-templated transcription, elongation (GO:0006354);; Biological Process: translation (GO:0006412);; Cellular Component: large ribosomal subunit (GO:0015934);;	K02907|1e-62|vvi:100261459|hypothetical protein LOC100261459	--	--	Ribosomal protein L30p/L7e	--	PREDICTED: uncharacterized protein LOC100819606 [Glycine max]
Glyma.02G269900	--	--	Molecular Function: DNA binding (GO:0003677);; Biological Process: cellular aromatic compound metabolic process (GO:0006725);; Biological Process: nitrogen compound metabolic process (GO:0006807);; Biological Process: pattern specification process (GO:0007389);; Biological Process: post-embryonic morphogenesis (GO:0009886);; Biological Process: cellular biosynthetic process (GO:0044249);; Biologi…	--	[K]	Transcription	KNOX2 domain;; KNOX1 domain;; Homeobox KN domain;; Homeobox domain	Homeobox protein knotted-1-like LET6 GN=LET6 OS=Solanum lycopersicum (Tomato) PE=2 SV=1	Homeobox protein SBH1 [Glycine soja]
Glyma.02G270000	--	--	--	K14012|1e-102|rcu:RCOM_1116820|UBX domain-containing protein, putative	[Y]	Nuclear structure	SEP domain;; UBA-like domain	Plant UBX domain-containing protein 5 {ECO:0000303|Ref.5} OS=Arabidopsis thaliana (Mouse-ear cress) PE=1 SV=1	PREDICTED: UBA and UBX domain-containing protein At4g15410-like [Glycine max]
Glyma.02G270100	--	--	--	--	[S]	Function unknown	FAM91 N-terminus;; FAM91 C-terminus	--	PREDICTED: protein FAM91A1-like [Glycine max]
Glyma.02G270200	--	--	--	--	[R]	General function prediction only	ML domain	--	uncharacterized protein LOC100306609 precursor [Glycine max]
Glyma.02G270300	--	--	Cellular Component: protein phosphatase type 2A complex (GO:0000159);; Biological Process: signal transduction (GO:0007165);; Molecular Function: protein phosphatase type 2A regulator activity (GO:0008601);; Biological Process: regulation of catalytic activity (GO:0050790);;	K11584|0.0|rcu:RCOM_1116380|protein phosphatase 2a, regulatory subunit, putative	[T]	Signal transduction mechanisms	Protein phosphatase 2A regulatory B subunit (B56 family)	Serine/threonine protein phosphatase 2A 59 kDa regulatory subunit B&apos; zeta isoform GN=B&apos;ZETA OS=Arabidopsis thaliana (Mouse-ear cress) PE=2 SV=2	PREDICTED: serine/threonine protein phosphatase 2A 59 kDa regulatory subunit B&apos; zeta isoform-like [Glycine max]
Glyma.02G270400	[R]	General function prediction only	--	--	--	--	Protein of unknown function (DUF861)	--	uncharacterized protein LOC100776314 [Glycine max]
Glyma.02G270500	--	--	Cellular Component: integral component of membrane (GO:0016021);; Biological Process: transcription factor import into nucleus (GO:0042991);;	--	--	--	--	--	uncharacterized protein LOC100305920 [Glycine max]
Glyma.02G270600	--	--	--	--	--	--	--	--	CLE22 protein [Glycine max]
Glyma.02G270700	[RTKL]	--	Molecular Function: protein serine/threonine kinase activity (GO:0004674);; Molecular Function: non-membrane spanning protein tyrosine kinase activity (GO:0004715);; Molecular Function: ATP binding (GO:0005524);; Biological Process: peptidyl-tyrosine phosphorylation (GO:0018108);;	K13429|0.0|rcu:RCOM_1115620|receptor protein kinase, putative (EC:2.7.10.2)	--	--	Protein tyrosine kinase;; Protein kinase domain	Chitin elicitor receptor kinase 1 (Precursor) GN=MIL23.20 OS=Arabidopsis thaliana (Mouse-ear cress) PE=1 SV=1	PREDICTED: chitin elicitor receptor kinase 1-like isoform X1 [Glycine max]
Glyma.02G270800	[RTKL]	--	Molecular Function: protein serine/threonine kinase activity (GO:0004674);; Molecular Function: non-membrane spanning protein tyrosine kinase activity (GO:0004715);; Molecular Function: ATP binding (GO:0005524);; Biological Process: peptidyl-tyrosine phosphorylation (GO:0018108);;	K13429|0.0|rcu:RCOM_1115620|receptor protein kinase, putative (EC:2.7.10.2)	--	--	Protein tyrosine kinase;; Protein kinase domain;; LysM domain	Chitin elicitor receptor kinase 1 (Precursor) GN=MIL23.20 OS=Arabidopsis thaliana (Mouse-ear cress) PE=1 SV=1	PREDICTED: chitin elicitor receptor kinase 1-like [Glycine max]
Glyma.02G270900	--	--	--	--	--	--	Plant protein of unknown function	--	UPF0481 protein [Glycine soja]
Glyma.02G271000	--	--	--	--	--	--	Plant protein of unknown function	UPF0481 protein At3g47200 GN=At3g47200 OS=Arabidopsis thaliana (Mouse-ear cress) PE=2 SV=1	PREDICTED: UPF0481 protein At3g47200-like [Glycine max]
Glyma.02G271100	--	--	Molecular Function: RNA binding (GO:0003723);; Molecular Function: ribonuclease III activity (GO:0004525);; Biological Process: RNA processing (GO:0006396);; Biological Process: ubiquitin-dependent protein catabolic process (GO:0006511);; Biological Process: RNA phosphodiester bond hydrolysis, endonucleolytic (GO:0090502);;	--	[O]	Posttranslational modification, protein turnover, chaperones	Ubiquitin fusion degradation protein UFD1	--	PREDICTED: uncharacterized protein LOC100777384 [Glycine max]
Glyma.02G271200	[S]	Function unknown	--	--	[R]	General function prediction only	Leucine Rich repeats (2 copies);; Leucine rich repeat;; Leucine Rich Repeat;; Leucine Rich repeat;; Leucine rich repeat	Receptor-like protein 12 (Precursor) GN=RLP12 OS=Arabidopsis thaliana (Mouse-ear cress) PE=2 SV=2	PREDICTED: receptor-like protein 12-like [Glycine max]
Glyma.02G271300	[S]	Function unknown	Molecular Function: 4-alpha-glucanotransferase activity (GO:0004134);; Biological Process: glycogen metabolic process (GO:0005977);; Cellular Component: membrane (GO:0016020);;	--	[R]	General function prediction only	Domain of unknown function DUF221;; Late exocytosis, associated with Golgi transport;; Domain of unknown function (DUF4463)	CSC1-like protein At3g21620 GN=At3g21620 OS=Arabidopsis thaliana (Mouse-ear cress) PE=2 SV=1	PREDICTED: uncharacterized membrane protein C2G11.09-like [Glycine max]
Glyma.02G271400	--	--	Biological Process: metabolic process (GO:0008152);; Molecular Function: cellulase activity (GO:0008810);;	--	--	--	--	Protein disulfide-isomerase LQY1, chloroplastic {ECO:0000303|PubMed:21586683} (Precursor) OS=Arabidopsis thaliana (Mouse-ear cress) PE=1 SV=1	uncharacterized protein LOC100305836 [Glycine max]
Glyma.02G271500	[O]	Posttranslational modification, protein turnover, chaperones	Biological Process: ubiquitin-dependent protein catabolic process (GO:0006511);; Molecular Function: cysteine-type peptidase activity (GO:0008234);; Molecular Function: thiol-dependent ubiquitinyl hydrolase activity (GO:0036459);;	K11838|0.0|vvi:100266796|hypothetical protein LOC100266796	[O]	Posttranslational modification, protein turnover, chaperones	ICP0-binding domain of Ubiquitin-specific protease 7;; Ubiquitin-specific protease C-terminal;; Ubiquitin carboxyl-terminal hydrolase;; Ubiquitin carboxyl-terminal hydrolase;; MATH domain	Ubiquitin carboxyl-terminal hydrolase 12 GN=UBP12 OS=Arabidopsis thaliana (Mouse-ear cress) PE=1 SV=2	PREDICTED: ubiquitin carboxyl-terminal hydrolase 12-like isoform X2 [Glycine max]
Glyma.02G271600	--	--	--	--	[R]	General function prediction only	PPR repeat family;; PPR repeat;; PPR repeat;; Pentatricopeptide repeat domain	Pentatricopeptide repeat-containing protein At2g13420, mitochondrial (Precursor) GN=At2g13420 OS=Arabidopsis thaliana (Mouse-ear cress) PE=2 SV=1	PREDICTED: pentatricopeptide repeat-containing protein At2g13420, mitochondrial-like [Glycine max]
Glyma.02G271700	[RTKL]	--	Molecular Function: chromatin binding (GO:0003682);; Molecular Function: protein serine/threonine kinase activity (GO:0004674);; Molecular Function: ATP binding (GO:0005524);; Cellular Component: nucleus (GO:0005634);; Biological Process: DNA repair (GO:0006281);; Biological Process: protein phosphorylation (GO:0006468);; Biological Process: mitotic sister chromatid cohesion (GO:0007064);; Cellul…	K08864|0.0|vvi:100265049|hypothetical protein LOC100265049	[T]	Signal transduction mechanisms	Protein kinase domain;; Protein tyrosine kinase	Serine/threonine-protein kinase TOUSLED GN=F22D1.100 OS=Arabidopsis thaliana (Mouse-ear cress) PE=1 SV=1	PREDICTED: serine/threonine-protein kinase TOUSLED-like isoform X2 [Glycine max]
Glyma.02G271800	[R]	General function prediction only	Cellular Component: small-subunit processome (GO:0032040);;	--	[R]	General function prediction only	Fcf1	--	PREDICTED: rRNA-processing protein UTP23 homolog [Glycine max]
Glyma.02G271900	[D]	Cell cycle control, cell division, chromosome partitioning	Cellular Component: chromosome, centromeric region (GO:0000775);; Cellular Component: chromatin (GO:0000785);; Molecular Function: chromatin binding (GO:0003682);; Molecular Function: ATP binding (GO:0005524);; Cellular Component: cytoplasm (GO:0005737);; Cellular Component: spindle (GO:0005819);; Biological Process: DNA repair (GO:0006281);; Biological Process: mitotic sister chromatid cohesion …	K06669|0.0|vvi:100257283|hypothetical protein LOC100257283	[D]	Cell cycle control, cell division, chromosome partitioning	RecF/RecN/SMC N terminal domain;; SMC proteins Flexible Hinge Domain;; AAA domain;; AAA domain;; AAA ATPase domain	Structural maintenance of chromosomes protein 3 GN=T22O13.6 OS=Arabidopsis thaliana (Mouse-ear cress) PE=2 SV=1	PREDICTED: structural maintenance of chromosomes protein 3-like [Glycine max]
Glyma.02G272000	[J]	Translation, ribosomal structure and biogenesis	Molecular Function: structural constituent of ribosome (GO:0003735);; Cellular Component: ribosome (GO:0005840);; Biological Process: translation (GO:0006412);; Molecular Function: rRNA binding (GO:0019843);;	--	[J]	Translation, ribosomal structure and biogenesis	Ribosomal protein L20	50S ribosomal protein L20, chloroplastic GN=rpl20 OS=Chlorella vulgaris (Green alga) PE=3 SV=2	PREDICTED: uncharacterized protein LOC100527387 isoform X1 [Glycine max]
Glyma.02G272100	[G]	Carbohydrate transport and metabolism	Biological Process: carbohydrate metabolic process (GO:0005975);; Molecular Function: beta-glucosidase activity (GO:0008422);;	--	--	--	Glycosyl hydrolase family 3 N terminal domain;; Glycosyl hydrolase family 3 C-terminal domain	Alpha-L-arabinofuranosidase (Precursor) OS=Medicago sativa subsp. varia (Alfalfa) PE=2 SV=1	PREDICTED: lysosomal beta glucosidase-like isoform X3 [Glycine max]
Glyma.02G272200	[F]	Nucleotide transport and metabolism	Molecular Function: iron ion binding (GO:0005506);; Molecular Function: electron carrier activity (GO:0009055);; Molecular Function: abscisic aldehyde oxidase activity (GO:0010293);; Molecular Function: oxidoreductase activity, acting on CH-OH group of donors (GO:0016614);; Molecular Function: flavin adenine dinucleotide binding (GO:0050660);; Molecular Function: 2 iron, 2 sulfur cluster binding …	--	[F]	Nucleotide transport and metabolism	Molybdopterin-binding domain of aldehyde dehydrogenase;; FAD binding domain in molybdopterin dehydrogenase;; Aldehyde oxidase and xanthine dehydrogenase, a/b hammerhead domain;; [2Fe-2S] binding domain;; CO dehydrogenase flavoprotein C-terminal domain;; 2Fe-2S iron-sulfur cluster binding domain	Abscisic-aldehyde oxidase GN=F20F1.2 OS=Arabidopsis thaliana (Mouse-ear cress) PE=1 SV=1	PREDICTED: abscisic-aldehyde oxidase-like [Glycine max]
Glyma.02G272300	[F]	Nucleotide transport and metabolism	Molecular Function: oxidoreductase activity (GO:0016491);; Molecular Function: metal ion binding (GO:0046872);; Molecular Function: iron-sulfur cluster binding (GO:0051536);;	K09842|1e-138|vvi:100265098|hypothetical protein LOC100265098	[F]	Nucleotide transport and metabolism	Molybdopterin-binding domain of aldehyde dehydrogenase;; Molybdopterin-binding domain of aldehyde dehydrogenase	Abscisic-aldehyde oxidase GN=F20F1.2 OS=Arabidopsis thaliana (Mouse-ear cress) PE=1 SV=1	Aldehyde oxidase 4 [Glycine soja]
Glyma.02G272400	[F]	Nucleotide transport and metabolism	Molecular Function: iron ion binding (GO:0005506);; Molecular Function: electron carrier activity (GO:0009055);; Molecular Function: abscisic aldehyde oxidase activity (GO:0010293);; Molecular Function: oxidoreductase activity, acting on CH-OH group of donors (GO:0016614);; Molecular Function: flavin adenine dinucleotide binding (GO:0050660);; Molecular Function: 2 iron, 2 sulfur cluster binding …	--	[F]	Nucleotide transport and metabolism	Molybdopterin-binding domain of aldehyde dehydrogenase;; FAD binding domain in molybdopterin dehydrogenase;; Aldehyde oxidase and xanthine dehydrogenase, a/b hammerhead domain;; [2Fe-2S] binding domain;; CO dehydrogenase flavoprotein C-terminal domain;; 2Fe-2S iron-sulfur cluster binding domain	Abscisic-aldehyde oxidase GN=F20F1.2 OS=Arabidopsis thaliana (Mouse-ear cress) PE=1 SV=1	PREDICTED: abscisic-aldehyde oxidase-like [Glycine max]
Glyma.02G272500	--	--	--	--	[O]	Posttranslational modification, protein turnover, chaperones	Hsp20/alpha crystallin family	Pollen-specific leucine-rich repeat extensin-like protein 1 (Precursor) GN=PEX1 OS=Arabidopsis thaliana (Mouse-ear cress) PE=2 SV=1	PREDICTED: proteoglycan 4-like [Glycine max]
Glyma.02G272600	--	--	--	--	[O]	Posttranslational modification, protein turnover, chaperones	--	Inactive protein RESTRICTED TEV MOVEMENT 2 GN=RTM2 OS=Arabidopsis thaliana (Mouse-ear cress) PE=3 SV=1	PREDICTED: uncharacterized protein LOC100806235 [Glycine max]
Glyma.02G272700	[H]	Coenzyme transport and metabolism	Biological Process: MAPK cascade (GO:0000165);; Molecular Function: ATP binding (GO:0005524);; Cellular Component: cytosol (GO:0005829);; Biological Process: protein targeting to membrane (GO:0006612);; Biological Process: Mo-molybdopterin cofactor biosynthetic process (GO:0006777);; Biological Process: response to cold (GO:0009409);; Biological Process: auxin-activated signaling pathway (GO:0009…	K03750|0.0|rcu:RCOM_0953150|molybdopterin biosynthesis protein, putative	[H]	Coenzyme transport and metabolism	Probable molybdopterin binding domain;; MoeA N-terminal region (domain I and II);; MoeA C-terminal region (domain IV)	Molybdopterin adenylyltransferase GN=CNX1 OS=Arabidopsis thaliana (Mouse-ear cress) PE=1 SV=2	molybdopterin biosynthesis protein CNX1-like [Glycine max]
Glyma.02G272800	--	--	--	--	[DR]	--	BTB/POZ domain;; MATH domain	BTB/POZ and MATH domain-containing protein 4 GN=BPM4 OS=Arabidopsis thaliana (Mouse-ear cress) PE=1 SV=1	PREDICTED: BTB/POZ and MATH domain-containing protein 4-like [Glycine max]
Glyma.02G273000	[R]	General function prediction only	Molecular Function: RNA binding (GO:0003723);; Cellular Component: nucleolus (GO:0005730);; Biological Process: rRNA processing (GO:0006364);; Cellular Component: intracellular ribonucleoprotein complex (GO:0030529);;	K06961|0.0|rcu:RCOM_1575910|Ribosomal RNA assembly protein mis3, putative	[JD]	--	--	--	PREDICTED: KRR1 small subunit processome component homolog [Glycine max]
Glyma.02G273100	[I]	Lipid transport and metabolism	Molecular Function: hydroxymethylglutaryl-CoA reductase (NADPH) activity (GO:0004420);; Cellular Component: endoplasmic reticulum membrane (GO:0005789);; Biological Process: calcium ion transport (GO:0006816);; Biological Process: Golgi organization (GO:0007030);; Biological Process: vacuole organization (GO:0007033);; Biological Process: response to wounding (GO:0009611);; Biological Process: re…	K00021|0.0|vvi:100265082|hypothetical protein LOC100265082	[I]	Lipid transport and metabolism	Hydroxymethylglutaryl-coenzyme A reductase	3-hydroxy-3-methylglutaryl-coenzyme A reductase 1 GN=HMGR1 OS=Hevea brasiliensis (Para rubber tree) PE=2 SV=1	PREDICTED: 3-hydroxy-3-methylglutaryl-coenzyme A reductase 1-like [Glycine max]
Glyma.02G273200	[O]	Posttranslational modification, protein turnover, chaperones	Molecular Function: ATP binding (GO:0005524);; Cellular Component: cytosol (GO:0005829);; Biological Process: gluconeogenesis (GO:0006094);; Biological Process: glycolytic process (GO:0006096);; Biological Process: protein folding (GO:0006457);; Biological Process: response to salt stress (GO:0009651);; Biological Process: plant-type cell wall organization (GO:0009664);; Biological Process: cell …	K09499|0.0|rcu:RCOM_0395630|chaperonin containing t-complex protein 1, eta subunit, tcph, putative	[O]	Posttranslational modification, protein turnover, chaperones	TCP-1/cpn60 chaperonin family	T-complex protein 1 subunit eta {ECO:0000303|PubMed:11599560} OS=Arabidopsis thaliana (Mouse-ear cress) PE=1 SV=1	PREDICTED: T-complex protein 1 subunit eta-like [Glycine max]
Glyma.02G273300	--	--	Molecular Function: 3-oxo-5-alpha-steroid 4-dehydrogenase activity (GO:0003865);; Molecular Function: enoyl-[acyl-carrier-protein] reductase (NADH) activity (GO:0004318);; Cellular Component: plasma membrane (GO:0005886);; Biological Process: fatty acid biosynthetic process (GO:0006633);; Biological Process: calcium ion transport (GO:0006816);; Biological Process: Golgi organization (GO:0007030);…	K10258|0.0|rcu:RCOM_1206840|Synaptic glycoprotein SC2, putative (EC:1.3.99.5)	[I]	Lipid transport and metabolism	3-oxo-5-alpha-steroid 4-dehydrogenase	Very-long-chain enoyl-CoA reductase {ECO:0000305} GN=T22E16.20 OS=Arabidopsis thaliana (Mouse-ear cress) PE=1 SV=1	uncharacterized protein LOC100785393 [Glycine max]
Glyma.02G273400	[GC]	--	Biological Process: metabolic process (GO:0008152);; Molecular Function: transferase activity, transferring hexosyl groups (GO:0016758);;	--	[GC]	--	UDP-glucoronosyl and UDP-glucosyl transferase	UDP-glycosyltransferase 92A1 GN=UGT92A1 OS=Arabidopsis thaliana (Mouse-ear cress) PE=2 SV=1	PREDICTED: UDP-glycosyltransferase 92A1-like [Glycine max]
Glyma.02G273500	--	--	Cellular Component: nucleus (GO:0005634);; Biological Process: fatty acid beta-oxidation (GO:0006635);; Molecular Function: zinc ion binding (GO:0008270);; Cellular Component: plasmodesma (GO:0009506);; Biological Process: protein import into peroxisome matrix (GO:0016558);;	--	--	--	MULE transposase domain;; SWIM zinc finger;; FAR1 DNA-binding domain	Protein FAR1-RELATED SEQUENCE 3 GN=FRS3 OS=Arabidopsis thaliana (Mouse-ear cress) PE=2 SV=2	PREDICTED: protein FAR1-RELATED SEQUENCE 3-like isoform X1 [Glycine max]
Glyma.02G273600	--	--	Cellular Component: nucleus (GO:0005634);;	--	[T]	Signal transduction mechanisms	Hyccin	Vegetative cell wall protein gp1 (Precursor) GN=GP1 OS=Chlamydomonas reinhardtii (Chlamydomonas smithii) PE=1 SV=1	PREDICTED: uncharacterized protein LOC100807831 [Glycine max]
Glyma.02G273700	[R]	General function prediction only	Biological Process: lipid metabolic process (GO:0006629);; Biological Process: cellular response to phosphate starvation (GO:0016036);; Molecular Function: hydrolase activity, acting on ester bonds (GO:0016788);;	--	[R]	General function prediction only	WD domain, G-beta repeat;; F-box domain;; F-box-like	F-box/WD-40 repeat-containing protein At5g21040 GN=At5g21040 OS=Arabidopsis thaliana (Mouse-ear cress) PE=2 SV=1	PREDICTED: F-box/WD-40 repeat-containing protein At5g21040-like [Glycine max]
Glyma.02G273800	[C]	Energy production and conversion	Cellular Component: chloroplast thylakoid membrane (GO:0009535);; Biological Process: vitamin E biosynthetic process (GO:0010189);; Biological Process: chlorophyll biosynthetic process (GO:0015995);; Molecular Function: oxidoreductase activity, acting on the CH-CH group of donors, NAD or NADP as acceptor (GO:0016628);; Biological Process: cysteine biosynthetic process (GO:0019344);; Biological Pr…	K10960|0.0|vvi:100253115|hypothetical protein LOC100253115	--	--	FAD binding domain;; Pyridine nucleotide-disulphide oxidoreductase	Geranylgeranyl diphosphate reductase, chloroplastic (Precursor) GN=CHLP OS=Nicotiana tabacum (Common tobacco) PE=2 SV=1	PREDICTED: geranylgeranyl diphosphate reductase, chloroplastic-like [Glycine max]
Glyma.02G273900	--	--	Biological Process: lipid metabolic process (GO:0006629);; Molecular Function: hydrolase activity, acting on ester bonds (GO:0016788);;	--	--	--	GDSL-like Lipase/Acylhydrolase	GDSL esterase/lipase At1g71250 (Precursor) GN=At1g71250 OS=Arabidopsis thaliana (Mouse-ear cress) PE=2 SV=1	PREDICTED: GDSL esterase/lipase At1g71250-like [Glycine max]
Glyma.02G274000	[C]	Energy production and conversion	Molecular Function: zinc ion binding (GO:0008270);; Molecular Function: S-(hydroxymethyl)glutathione dehydrogenase activity (GO:0051903);; Biological Process: oxidation-reduction process (GO:0055114);;	K00121|1e-142|vvi:100264420|hypothetical protein LOC100264420	[Q]	Secondary metabolites biosynthesis, transport and catabolism	Alcohol dehydrogenase GroES-like domain	Alcohol dehydrogenase-like 7 GN=At5g42250 OS=Arabidopsis thaliana (Mouse-ear cress) PE=2 SV=1	PREDICTED: alcohol dehydrogenase-like 7-like [Glycine max]
Glyma.02G274100	[C]	Energy production and conversion	Molecular Function: zinc ion binding (GO:0008270);; Molecular Function: S-(hydroxymethyl)glutathione dehydrogenase activity (GO:0051903);; Biological Process: oxidation-reduction process (GO:0055114);;	K00121|0.0|vvi:100264420|hypothetical protein LOC100264420	[Q]	Secondary metabolites biosynthesis, transport and catabolism	Alcohol dehydrogenase GroES-like domain;; Zinc-binding dehydrogenase	Alcohol dehydrogenase-like 7 GN=At5g42250 OS=Arabidopsis thaliana (Mouse-ear cress) PE=2 SV=1	PREDICTED: alcohol dehydrogenase-like 7-like isoform X2 [Glycine max]
Glyma.02G274200	--	--	--	--	--	--	--	--	uncharacterized protein LOC100789121 [Glycine max]
Glyma.02G274300	--	--	Cellular Component: intracellular (GO:0005622);; Cellular Component: plasma membrane (GO:0005886);; Biological Process: protein glycosylation (GO:0006486);; Biological Process: fatty acid beta-oxidation (GO:0006635);; Cellular Component: plasmodesma (GO:0009506);; Biological Process: protein import into peroxisome matrix (GO:0016558);;	--	--	--	Protein of unknown function (DUF632);; Protein of unknown function (DUF630)	--	PREDICTED: uncharacterized protein LOC100809444 isoform X1 [Glycine max]
Glyma.02G274400	--	--	--	--	--	--	Late embryogenesis abundant protein	Protein YLS9 GN=F11F19.11 OS=Arabidopsis thaliana (Mouse-ear cress) PE=2 SV=1	PREDICTED: uncharacterized protein LOC100789647 [Glycine max]
Glyma.02G274500	[RTKL]	--	Molecular Function: transmembrane receptor protein tyrosine kinase activity (GO:0004714);; Molecular Function: ATP binding (GO:0005524);; Cellular Component: plasma membrane (GO:0005886);; Cellular Component: integral component of membrane (GO:0016021);; Biological Process: peptidyl-tyrosine phosphorylation (GO:0018108);;	--	--	--	Protein tyrosine kinase;; Protein kinase domain;; Leucine Rich Repeat;; Leucine Rich repeats (2 copies);; Leucine rich repeat;; Leucine Rich repeat;; Leucine rich repeat N-terminal domain;; Leucine rich repeat	Probable inactive receptor kinase At5g10020 (Precursor) GN=At5g10020 OS=Arabidopsis thaliana (Mouse-ear cress) PE=1 SV=2	PREDICTED: probable inactive receptor kinase At5g10020-like isoform X3 [Glycine max]
Glyma.02G274600	--	--	Molecular Function: transcription factor activity, sequence-specific DNA binding (GO:0003700);; Cellular Component: nucleus (GO:0005634);; Biological Process: regulation of transcription, DNA-templated (GO:0006355);;	K14514|0.0|rcu:RCOM_0656830|ETHYLENE-INSENSITIVE3 protein, putative	--	--	Ethylene insensitive 3	Protein ETHYLENE INSENSITIVE 3 GN=EIN3 OS=Arabidopsis thaliana (Mouse-ear cress) PE=1 SV=1	PREDICTED: protein ETHYLENE INSENSITIVE 3 [Glycine max]
Glyma.02G274700	[U]	Intracellular trafficking, secretion, and vesicular transport	Cellular Component: Golgi apparatus (GO:0005794);; Biological Process: postreplication repair (GO:0006301);; Biological Process: intracellular protein transport (GO:0006886);; Biological Process: endocytosis (GO:0006897);; Molecular Function: protein transporter activity (GO:0008565);; Cellular Component: membrane coat (GO:0030117);; Cellular Component: clathrin-coated vesicle membrane (GO:003066…	--	[U]	Intracellular trafficking, secretion, and vesicular transport	Clathrin adaptor complex small chain	AP-1 complex subunit sigma-2 GN=AAP19-2 OS=Arabidopsis thaliana (Mouse-ear cress) PE=2 SV=1	PREDICTED: AP-1 complex subunit sigma-2-like isoform X2 [Glycine max]
Glyma.02G274800	--	--	Molecular Function: transmembrane receptor protein tyrosine kinase activity (GO:0004714);; Biological Process: peptidyl-tyrosine phosphorylation (GO:0018108);; Molecular Function: 2-alkenal reductase [NAD(P)] activity (GO:0032440);; Biological Process: oxidation-reduction process (GO:0055114);;	--	[R]	General function prediction only	Leucine Rich repeats (2 copies);; Leucine Rich Repeat;; Leucine rich repeat N-terminal domain;; Leucine rich repeat;; Leucine Rich repeat	Somatic embryogenesis receptor kinase 2 (Precursor) GN=SERK2 OS=Arabidopsis thaliana (Mouse-ear cress) PE=1 SV=1	PREDICTED: somatic embryogenesis receptor kinase 2-like [Glycine max]
Glyma.02G274900	--	--	Molecular Function: translation initiation factor activity (GO:0003743);; Biological Process: translational initiation (GO:0006413);;	--	[J]	Translation, ribosomal structure and biogenesis	Piwi domain;; PAZ domain;; Domain of unknown function (DUF1785)	Protein argonaute 4 GN=T20P8.9 OS=Arabidopsis thaliana (Mouse-ear cress) PE=1 SV=2	PREDICTED: protein argonaute 4-like [Glycine max]
Glyma.02G275000	[I]	Lipid transport and metabolism	Molecular Function: adenylate kinase activity (GO:0004017);; Molecular Function: oxidoreductase activity (GO:0016491);; Biological Process: nucleotide phosphorylation (GO:0046939);; Biological Process: oxidation-reduction process (GO:0055114);;	--	[I]	Lipid transport and metabolism	MaoC like domain;; N-terminal half of MaoC dehydratase	--	PREDICTED: hydroxyacyl-thioester dehydratase type 2, mitochondrial-like isoform X1 [Glycine max]
Glyma.02G275100	--	--	--	--	--	--	Plastocyanin-like domain	Lamin-like protein (Precursor) GN=At5g15350 OS=Arabidopsis thaliana (Mouse-ear cress) PE=1 SV=1	PREDICTED: lamin-like protein-like [Glycine max]
Glyma.02G275200	--	--	Molecular Function: electron carrier activity (GO:0009055);;	--	--	--	Plastocyanin-like domain	Lamin-like protein (Precursor) GN=At5g15350 OS=Arabidopsis thaliana (Mouse-ear cress) PE=1 SV=1	PREDICTED: lamin-like protein-like [Glycine max]
Glyma.02G275300	[OJ]	--	--	--	[OJ]	--	La domain;; Slime mold cyclic AMP receptor	La-related protein 1A GN=LARP1A OS=Arabidopsis thaliana (Mouse-ear cress) PE=1 SV=1	PREDICTED: la-related protein 1B-like [Glycine max]
Glyma.02G275400	[R]	General function prediction only	Molecular Function: nucleotide binding (GO:0000166);; Molecular Function: nucleic acid binding (GO:0003676);;	--	[R]	General function prediction only	RNA recognition motif. (a.k.a. RRM, RBD, or RNP domain);; RNA recognition motif (a.k.a. RRM, RBD, or RNP domain);; RNA recognition motif. (a.k.a. RRM, RBD, or RNP domain)	UBP1-associated protein 2A GN=UBA2A OS=Arabidopsis thaliana (Mouse-ear cress) PE=1 SV=1	PREDICTED: nuclear polyadenylated RNA-binding protein 4-like isoform X1 [Glycine max]
Glyma.02G275500	--	--	Biological Process: response to sucrose (GO:0009744);; Biological Process: response to fructose (GO:0009750);; Molecular Function: kinase activity (GO:0016301);; Biological Process: phosphorylation (GO:0016310);; Biological Process: cellular response to nitrogen levels (GO:0043562);;	K07199|1e-150|vvi:100266800|hypothetical protein LOC100266800	[G]	Carbohydrate transport and metabolism	5'-AMP-activated protein kinase beta subunit, interation domain	SNF1-related protein kinase regulatory subunit beta-1 GN=KINB1 OS=Arabidopsis thaliana (Mouse-ear cress) PE=1 SV=1	PREDICTED: SNF1-related protein kinase regulatory subunit beta-1 [Glycine max]
Glyma.02G275600	[TZDR]	--	Molecular Function: phosphorylase kinase activity (GO:0004689);; Molecular Function: calcium ion binding (GO:0005509);; Biological Process: detection of calcium ion (GO:0005513);; Molecular Function: protein binding (GO:0005515);; Cellular Component: cytosol (GO:0005829);; Biological Process: acetyl-CoA metabolic process (GO:0006084);; Biological Process: protein phosphorylation (GO:0006468);; Bi…	K02183|1e-104|zma:542465|calmodulin (EC:2.7.11.19)	[T]	Signal transduction mechanisms	EF hand;; EF-hand domain pair;; EF-hand domain pair;; EF-hand domain;; EF hand;; EF-hand domain;; Cytoskeletal-regulatory complex EF hand;; Secreted protein acidic and rich in cysteine Ca binding region;; Uncharacterised protein family (UPF0154);; Ca2+ insensitive EF hand;; Caleosin related protein	Calmodulin GN=CAL1 OS=Medicago sativa (Alfalfa) PE=2 SV=2	calmodulin [Glycine max]
Glyma.02G275700	[A]	RNA processing and modification	Molecular Function: nucleic acid binding (GO:0003676);; Molecular Function: exonuclease activity (GO:0004527);; Molecular Function: transferase activity (GO:0016740);; Biological Process: nucleic acid phosphodiester bond hydrolysis (GO:0090305);;	K13288|1e-122|vvi:100251263|hypothetical protein LOC100251263	[A]	RNA processing and modification	Exonuclease	Oligoribonuclease GN=At2g26970 OS=Arabidopsis thaliana (Mouse-ear cress) PE=2 SV=2	PREDICTED: oligoribonuclease-like [Glycine max]
Glyma.02G275800	[Q]	Secondary metabolites biosynthesis, transport and catabolism	Cellular Component: chloroplast (GO:0009507);; Cellular Component: plastid envelope (GO:0009526);; Cellular Component: membrane (GO:0016020);;	--	--	--	mce related protein	Protein TRIGALACTOSYLDIACYLGLYCEROL 2, chloroplastic (Precursor) GN=MQC12.6 OS=Arabidopsis thaliana (Mouse-ear cress) PE=2 SV=1	Protein TRIGALACTOSYLDIACYLGLYCEROL 2, chloroplastic [Glycine soja]
Glyma.02G275900	[RTKL]	--	Molecular Function: protein serine/threonine kinase activity (GO:0004674);; Molecular Function: ATP binding (GO:0005524);; Biological Process: protein phosphorylation (GO:0006468);; Biological Process: signal transduction (GO:0007165);;	--	[T]	Signal transduction mechanisms	Protein kinase domain;; Protein tyrosine kinase;; NAF domain;; Kinase-like	CBL-interacting serine/threonine-protein kinase 3 GN=T20P8.3 OS=Arabidopsis thaliana (Mouse-ear cress) PE=1 SV=2	PREDICTED: uncharacterized protein LOC100794566 isoform X1 [Glycine max]
Glyma.02G276000	[RTKL]	--	Molecular Function: cyclin-dependent protein serine/threonine kinase activity (GO:0004693);; Molecular Function: ATP binding (GO:0005524);; Biological Process: protein phosphorylation (GO:0006468);; Biological Process: regulation of cell cycle (GO:0051726);;	K08819|0.0|vvi:100263383|similar to cdc2MsC	[D]	Cell cycle control, cell division, chromosome partitioning	Protein kinase domain;; Protein tyrosine kinase	Cyclin-dependent kinase C-2 GN=OJ1294_F06.25 OS=Oryza sativa subsp. japonica (Rice) PE=2 SV=1	PREDICTED: cyclin-dependent kinase C-2-like [Glycine max]
Glyma.02G276100	--	--	--	--	--	--	--	--	PREDICTED: uncharacterized protein LOC100796492 [Glycine max]
Glyma.02G276200	--	--	--	--	[R]	General function prediction only	PPR repeat family;; PPR repeat;; PPR repeat;; Pentatricopeptide repeat domain	Pentatricopeptide repeat-containing protein At1g71210 GN=At1g71210 OS=Arabidopsis thaliana (Mouse-ear cress) PE=2 SV=1	PREDICTED: pentatricopeptide repeat-containing protein At1g71210-like [Glycine max]
Glyma.02G276300	--	--	Biological Process: metabolic process (GO:0008152);; Molecular Function: isomerase activity (GO:0016853);; Molecular Function: heat shock protein binding (GO:0031072);; Molecular Function: unfolded protein binding (GO:0051082);;	--	--	--	--	--	PREDICTED: uncharacterized protein LOC102665510 [Glycine max]
Glyma.02G276400	--	--	Biological Process: phosphatidylinositol biosynthetic process (GO:0006661);; Biological Process: nitrogen compound metabolic process (GO:0006807);; Molecular Function: nickel cation binding (GO:0016151);; Molecular Function: heat shock protein binding (GO:0031072);; Biological Process: positive regulation of catalytic activity (GO:0048554);; Molecular Function: unfolded protein binding (GO:005108…	K03188|1e-128|vvi:100266725|hypothetical protein LOC100266725	--	--	UreF	Urease accessory protein F GN=UREF OS=Arabidopsis thaliana (Mouse-ear cress) PE=2 SV=1	PREDICTED: urease accessory protein F-like isoform X1 [Glycine max]
Glyma.02G276500	--	--	Molecular Function: kinase activity (GO:0016301);; Biological Process: phosphorylation (GO:0016310);;	--	[T]	Signal transduction mechanisms	--	--	hypothetical protein glysoja_004081 [Glycine soja]
Glyma.02G276600	[J]	Translation, ribosomal structure and biogenesis	Molecular Function: translation elongation factor activity (GO:0003746);; Cellular Component: eukaryotic translation elongation factor 1 complex (GO:0005853);; Biological Process: translational elongation (GO:0006414);;	K03232|1e-134|rcu:RCOM_0783980|elongation factor 1-beta, putative	[K]	Transcription	EF-1 guanine nucleotide exchange domain	Elongation factor 1-beta 2 GN=At5g19510 OS=Arabidopsis thaliana (Mouse-ear cress) PE=1 SV=1	uncharacterized protein LOC100500082 [Glycine max]
Glyma.02G276700	--	--	Biological Process: metabolic process (GO:0008152);; Molecular Function: zinc ion binding (GO:0008270);; Molecular Function: ligase activity (GO:0016874);;	K11982|1e-129|vvi:100251284|hypothetical protein LOC100251284	[O]	Posttranslational modification, protein turnover, chaperones	Ring finger domain;; zinc-finger;; Zinc finger, C3HC4 type (RING finger)	E3 ubiquitin-protein ligase RING1 GN=RING1 OS=Gossypium hirsutum (Upland cotton) PE=1 SV=1	PREDICTED: E3 ubiquitin-protein ligase RING1-like isoformX1 [Glycine max]
Glyma.02G276800	--	--	Molecular Function: translation elongation factor activity (GO:0003746);; Biological Process: translational elongation (GO:0006414);;	--	--	--	UBA/TS-N domain	--	PREDICTED: uncharacterized protein LOC100798094 [Glycine max]
Glyma.02G276900	[R]	General function prediction only	Molecular Function: pantetheine-phosphate adenylyltransferase activity (GO:0004595);; Molecular Function: ATP binding (GO:0005524);; Cellular Component: nucleus (GO:0005634);; Cellular Component: cytosol (GO:0005829);; Biological Process: lipid metabolic process (GO:0006629);; Biological Process: response to salt stress (GO:0009651);; Cellular Component: membrane (GO:0016020);; Biological Process…	--	[R]	General function prediction only	Cytidylyltransferase	Phosphopantetheine adenylyltransferase GN=T30D6.24 OS=Arabidopsis thaliana (Mouse-ear cress) PE=1 SV=1	uncharacterized protein LOC100798626 [Glycine max]
Glyma.02G277000	[K]	Transcription	Cellular Component: nucleus (GO:0005634);; Biological Process: terpenoid biosynthetic process (GO:0016114);; Molecular Function: sequence-specific DNA binding (GO:0043565);; Molecular Function: protein heterodimerization activity (GO:0046982);;	--	[K]	Transcription	Histone-like transcription factor (CBF/NF-Y) and archaeal histone	Nuclear transcription factor Y subunit C-3 OS=Arabidopsis thaliana (Mouse-ear cress) PE=2 SV=1	PREDICTED: dr1-associated corepressor-like [Glycine max]
Glyma.02G277100	--	--	--	--	[R]	General function prediction only	Domain of unknown function;; Ankyrin repeats (many copies);; Ankyrin repeats (many copies);; Ankyrin repeat	Ankyrin repeat-containing protein At3g12360 GN=At3g12360 OS=Arabidopsis thaliana (Mouse-ear cress) PE=2 SV=1	PREDICTED: uncharacterized protein LOC100815325 isoform X2 [Glycine max]
Glyma.02G277200	--	--	Cellular Component: mitochondrial outer membrane (GO:0005741);; Biological Process: cell adhesion (GO:0007155);; Biological Process: organ morphogenesis (GO:0009887);; Biological Process: trichome morphogenesis (GO:0010090);; Biological Process: vegetative to reproductive phase transition of meristem (GO:0010228);; Biological Process: protein desumoylation (GO:0016926);; Biological Process: galac…	--	--	--	ATP synthase regulation protein NCA2	--	PREDICTED: uncharacterized protein LOC100799669 isoform X1 [Glycine max]
Glyma.02G277300	--	--	Biological Process: cell morphogenesis (GO:0000902);; Cellular Component: Golgi apparatus (GO:0005794);; Cellular Component: cytosol (GO:0005829);; Cellular Component: plasma membrane (GO:0005886);; Biological Process: gluconeogenesis (GO:0006094);; Biological Process: glycolytic process (GO:0006096);; Biological Process: response to desiccation (GO:0009269);; Cellular Component: plasmodesma (GO:…	--	--	--	Late embryogenesis abundant protein	Desiccation protectant protein Lea14 homolog OS=Glycine max (Soybean) PE=2 SV=1	PREDICTED: uncharacterized protein LOC100800203 isoform X1 [Glycine max]
Glyma.02G277400	--	--	Molecular Function: actin binding (GO:0003779);; Biological Process: actin filament organization (GO:0007015);; Biological Process: regulation of stomatal movement (GO:0010119);; Biological Process: regulation of protein localization (GO:0032880);;	--	--	--	--	Stomatal closure-related actin-binding protein 1 {ECO:0000303|PubMed:21719691} OS=Arabidopsis thaliana (Mouse-ear cress) PE=1 SV=1	PREDICTED: cingulin-like isoform X1 [Glycine max]
Glyma.02G277500	[K]	Transcription	Biological Process: RNA splicing, via endonucleolytic cleavage and ligation (GO:0000394);; Molecular Function: translation initiation factor activity (GO:0003743);; Biological Process: DNA-templated transcription, initiation (GO:0006352);; Biological Process: transcription from RNA polymerase II promoter (GO:0006366);; Biological Process: translational initiation (GO:0006413);; Biological Process…	K03133|5e-90|pop:POPTR_709525|hypothetical protein	[K]	Transcription	Transcription initiation factor IID, 31kD subunit	Transcription initiation factor TFIID subunit 9 GN=F15I1.24 OS=Arabidopsis thaliana (Mouse-ear cress) PE=1 SV=1	PREDICTED: transcription initiation factor TFIID subunit 9-like [Glycine max]
Glyma.02G277600	[D]	Cell cycle control, cell division, chromosome partitioning	Biological Process: regulation of cyclin-dependent protein serine/threonine kinase activity (GO:0000079);; Cellular Component: nucleus (GO:0005634);; Molecular Function: protein kinase binding (GO:0019901);; Biological Process: cell division (GO:0051301);;	K05868|1e-164|pop:POPTR_804416|CYCB1-4	[D]	Cell cycle control, cell division, chromosome partitioning	Cyclin, N-terminal domain;; Cyclin, C-terminal domain	G2/mitotic-specific cyclin-1 OS=Antirrhinum majus (Garden snapdragon) PE=2 SV=1	PREDICTED: G2/mitotic-specific cyclin-1-like [Glycine max]
Glyma.02G277700	--	--	Molecular Function: copper ion binding (GO:0005507);; Molecular Function: electron carrier activity (GO:0009055);; Cellular Component: anchored component of membrane (GO:0031225);;	--	--	--	Plastocyanin-like domain	Blue copper protein (Precursor) OS=Pisum sativum (Garden pea) PE=2 SV=1	uncharacterized protein LOC100499721 precursor [Glycine max]
Glyma.02G277800	--	--	--	--	--	--	--	--	uncharacterized protein LOC100527775 [Glycine max]
Glyma.02G277900	[E]	Amino acid transport and metabolism	Molecular Function: hydroxymethylglutaryl-CoA lyase activity (GO:0004419);; Cellular Component: mitochondrial matrix (GO:0005759);; Biological Process: metabolic process (GO:0008152);; Molecular Function: metal ion binding (GO:0046872);;	K01640|0.0|vvi:100264975|hypothetical protein LOC100264975	[CE]	--	HMGL-like	Hydroxymethylglutaryl-CoA lyase, mitochondrial GN=HMGCL OS=Arabidopsis thaliana (Mouse-ear cress) PE=1 SV=2	PREDICTED: hydroxymethylglutaryl-CoA lyase, mitochondrial-like isoform X1 [Glycine max]
Glyma.02G278000	--	--	--	--	--	--	--	CLE22p (Precursor) GN=CLE22 OS=Arabidopsis thaliana (Mouse-ear cress) PE=2 SV=1	hypothetical protein glysoja_004066 [Glycine soja]
Glyma.02G278100	[T]	Signal transduction mechanisms	Molecular Function: protein serine/threonine phosphatase activity (GO:0004722);; Cellular Component: nucleus (GO:0005634);; Cellular Component: cytosol (GO:0005829);; Biological Process: protein dephosphorylation (GO:0006470);; Biological Process: negative regulation of abscisic acid-activated signaling pathway (GO:0009788);; Biological Process: regulation of stomatal movement (GO:0010119);; Biol…	K14497|7e-27|vvi:100255251|hypothetical protein LOC100255251	[T]	Signal transduction mechanisms	Protein phosphatase 2C	Protein phosphatase 2C 3 GN=AIP1 OS=Arabidopsis thaliana (Mouse-ear cress) PE=1 SV=1	PREDICTED: protein phosphatase 2C 37 [Glycine max]
Glyma.02G278200	--	--	--	--	--	--	Protein of unknown function (DUF1645)	--	PREDICTED: uncharacterized protein LOC102667373 [Glycine max]
Glyma.02G278300	--	--	--	--	--	--	F-box domain;; F-box-like	F-box protein At2g32560 GN=At2g32560 OS=Arabidopsis thaliana (Mouse-ear cress) PE=2 SV=1	PREDICTED: F-box protein At2g26850-like [Glycine max]
Glyma.02G278400	--	--	Molecular Function: transcription factor activity, sequence-specific DNA binding (GO:0003700);; Cellular Component: nucleus (GO:0005634);; Biological Process: regulation of transcription, DNA-templated (GO:0006355);; Biological Process: response to heat (GO:0009408);; Molecular Function: sequence-specific DNA binding (GO:0043565);;	--	[K]	Transcription	HSF-type DNA-binding	Heat stress transcription factor B-4b OS=Oryza sativa subsp. japonica (Rice) PE=1 SV=1	PREDICTED: heat stress transcription factor B-4b [Glycine max]
Glyma.02G278500	--	--	Molecular Function: hydroxyacylglutathione hydrolase activity (GO:0004416);; Biological Process: metabolic process (GO:0008152);;	--	[R]	General function prediction only	Las1-like	--	PREDICTED: uncharacterized protein LOC100818525 isoform X2 [Glycine max]
Glyma.02G278600	[F]	Nucleotide transport and metabolism	Molecular Function: dihydropyrimidinase activity (GO:0004157);; Cellular Component: endoplasmic reticulum (GO:0005783);; Cellular Component: Golgi apparatus (GO:0005794);; Biological Process: uracil catabolic process (GO:0006212);; Biological Process: fatty acid beta-oxidation (GO:0006635);; Biological Process: protein import into peroxisome matrix (GO:0016558);;	K01464|0.0|pop:POPTR_722702|dihydropyrimidinase (EC:3.5.2.2)	[F]	Nucleotide transport and metabolism	Amidohydrolase;; Amidohydrolase family;; Amidohydrolase;; Amidohydrolase	Dihydropyrimidinase {ECO:0000303|PubMed:12626710} OS=Arabidopsis thaliana (Mouse-ear cress) PE=1 SV=1	PREDICTED: dihydropyrimidinase-like [Glycine max]
Glyma.02G278700	--	--	Molecular Function: dihydropyrimidinase activity (GO:0004157);; Molecular Function: kinase activity (GO:0016301);; Biological Process: phosphorylation (GO:0016310);;	--	--	--	Cleavage site for pathogenic type III effector avirulence factor Avr	--	PREDICTED: uncharacterized protein LOC102667968 [Glycine max]
Glyma.02G278800	[R]	General function prediction only	Molecular Function: nucleotide binding (GO:0000166);; Molecular Function: nucleic acid binding (GO:0003676);;	K12833|2e-82|rcu:RCOM_0974800|Pre-mRNA branch site protein p14, putative	[R]	General function prediction only	RNA recognition motif. (a.k.a. RRM, RBD, or RNP domain);; RNA recognition motif (a.k.a. RRM, RBD, or RNP domain);; RNA recognition motif. (a.k.a. RRM, RBD, or RNP domain)	Splicing factor 3B subunit 6-like protein GN=At5g12190 OS=Arabidopsis thaliana (Mouse-ear cress) PE=2 SV=1	unknown [Glycine max]
Glyma.02G278900	[RTKL]	--	Molecular Function: calmodulin-dependent protein kinase activity (GO:0004683);; Molecular Function: calcium ion binding (GO:0005509);; Molecular Function: ATP binding (GO:0005524);; Biological Process: protein phosphorylation (GO:0006468);;	K13412|0.0|rcu:RCOM_1479000|calcium-dependent protein kinase, putative (EC:2.7.11.17)	[T]	Signal transduction mechanisms	Protein kinase domain;; EF hand;; EF-hand domain pair;; Protein tyrosine kinase;; EF-hand domain pair;; EF hand;; EF-hand domain;; Cytoskeletal-regulatory complex EF hand;; Ca2+ insensitive EF hand;; Kinase-like;; Toprim-like	Calcium-dependent protein kinase 34 GN=CPK34 OS=Arabidopsis thaliana (Mouse-ear cress) PE=2 SV=1	PREDICTED: calcium-dependent protein kinase 34-like [Glycine max]
Glyma.02G279000	[P]	Inorganic ion transport and metabolism	Biological Process: protein peptidyl-prolyl isomerization (GO:0000413);; Molecular Function: peptidyl-prolyl cis-trans isomerase activity (GO:0003755);; Cellular Component: chloroplast (GO:0009507);;	--	[H]	Coenzyme transport and metabolism	PPIC-type PPIASE domain;; PPIC-type PPIASE domain;; Rhodanese-like domain	Rhodanese-like/PpiC domain-containing protein 12 GN=At5g19370 OS=Arabidopsis thaliana (Mouse-ear cress) PE=2 SV=1	uncharacterized protein LOC100803404 [Glycine max]
Glyma.02G279100	[U]	Intracellular trafficking, secretion, and vesicular transport	Cellular Component: integral component of membrane (GO:0016021);; Biological Process: vesicle-mediated transport (GO:0016192);;	K08515|1e-146|rcu:RCOM_0923570|Vesicle-associated membrane protein, putative	[U]	Intracellular trafficking, secretion, and vesicular transport	Synaptobrevin;; Regulated-SNARE-like domain	Vesicle-associated membrane protein 711 GN=F10N7.40 OS=Arabidopsis thaliana (Mouse-ear cress) PE=1 SV=2	PREDICTED: vesicle-associated membrane protein 711-like [Glycine max]
Glyma.02G279300	--	--	Molecular Function: GTPase activator activity (GO:0005096);; Cellular Component: intracellular (GO:0005622);; Biological Process: positive regulation of GTPase activity (GO:0043547);;	--	[T]	Signal transduction mechanisms	RhoGAP domain;; Leucine-zipper of ternary complex factor MIP1;; PH domain	Rho GTPase-activating protein 7 GN=ROPGAP7 OS=Arabidopsis thaliana (Mouse-ear cress) PE=2 SV=1	PREDICTED: rho GTPase-activating protein 7-like isoform X2 [Glycine max]
Glyma.02G279400	--	--	Biological Process: vesicle-mediated transport (GO:0016192);;	--	[P]	Inorganic ion transport and metabolism	Got1/Sft2-like family	--	uncharacterized protein LOC100527869 [Glycine max]
Glyma.02G279500	--	--	Biological Process: nuclear-transcribed mRNA catabolic process, nonsense-mediated decay (GO:0000184);; Cellular Component: cytoplasmic mRNA processing body (GO:0000932);; Cellular Component: nucleus (GO:0005634);; Biological Process: defense response (GO:0006952);; Biological Process: multicellular organism development (GO:0007275);; Biological Process: regulation of growth (GO:0040008);; Biologi…	K14409|0.0|vvi:100267161|hypothetical protein LOC100267161	[A]	RNA processing and modification	Est1 DNA/RNA binding domain;; Telomerase activating protein Est1	Protein SMG7 GN=SMG7 OS=Arabidopsis thaliana (Mouse-ear cress) PE=2 SV=1	Telomerase-binding protein EST1A [Glycine soja]
Glyma.02G279600	--	--	Biological Process: metabolic process (GO:0008152);; Molecular Function: transferase activity (GO:0016740);;	--	--	--	--	--	hypothetical protein glysoja_004050 [Glycine soja]
Glyma.02G279700	--	--	Biological Process: metabolic process (GO:0008152);; Molecular Function: transferase activity (GO:0016740);;	--	[T]	Signal transduction mechanisms	--	Early nodulin-20 (Precursor) GN=ENOD20 OS=Medicago truncatula (Barrel medic) PE=3 SV=1	hypothetical protein PHAVU_008G201000g, partial [Phaseolus vulgaris]
Glyma.02G279800	--	--	--	--	--	--	Domain of unknown function (DUF296)	AT-hook motif nuclear-localized protein 28 {ECO:0000312|EMBL:FAA00299.1} OS=Arabidopsis thaliana (Mouse-ear cress) PE=2 SV=1	PREDICTED: uncharacterized protein LOC102666204 [Glycine max]
Glyma.02G279900	--	--	--	--	--	--	--	--	PREDICTED: uncharacterized protein LOC100775760 [Glycine max]
Glyma.02G280000	--	--	--	--	--	--	Domain of unknown function (DUF702)	Protein LATERAL ROOT PRIMORDIUM 1 GN=LRP1 OS=Arabidopsis thaliana (Mouse-ear cress) PE=1 SV=1	PREDICTED: protein LATERAL ROOT PRIMORDIUM 1-like [Glycine max]
Glyma.02G280100	--	--	--	--	--	--	Domain of unknown function (DUF4228)	--	PREDICTED: uncharacterized protein LOC100776840 [Glycine max]
Glyma.02G280200	--	--	--	--	[R]	General function prediction only	PPR repeat family;; PPR repeat;; PPR repeat;; Pentatricopeptide repeat domain	Pentatricopeptide repeat-containing protein At5g01110 GN=At5g01110 OS=Arabidopsis thaliana (Mouse-ear cress) PE=2 SV=1	Pentatricopeptide repeat-containing protein [Glycine soja]
Glyma.02G280300	[K]	Transcription	Molecular Function: transcription factor activity, sequence-specific DNA binding (GO:0003700);; Cellular Component: nucleus (GO:0005634);; Biological Process: regulation of transcription, DNA-templated (GO:0006355);; Molecular Function: sequence-specific DNA binding (GO:0043565);;	--	--	--	Homeobox domain;; Homeobox KN domain	Homeobox-leucine zipper protein HDG12 GN=F2H15.14 OS=Arabidopsis thaliana (Mouse-ear cress) PE=2 SV=1	PREDICTED: uncharacterized protein LOC100805913 isoform X1 [Glycine max]
Glyma.02G280400	[DZ]	--	Molecular Function: phospholipid binding (GO:0005543);; Cellular Component: cell cortex (GO:0005938);; Biological Process: metabolic process (GO:0008152);; Molecular Function: ligase activity (GO:0016874);; Biological Process: cortical protein anchoring (GO:0032065);; Molecular Function: metal ion binding (GO:0046872);;	--	--	--	Regulator of chromosome condensation (RCC1) repeat;; Transcription factor regulating root and shoot growth via Pin3;; Regulator of chromosome condensation (RCC1) repeat;; Transcription factor BRX N-terminal domain;; FYVE zinc finger;; Meiotic cell cortex C-terminal pleckstrin homology	Ultraviolet-B receptor UVR8 GN=UVR8 OS=Arabidopsis thaliana (Mouse-ear cress) PE=1 SV=1	PREDICTED: uncharacterized protein LOC100806439 isoform X3 [Glycine max]
Glyma.02G280500	[R]	General function prediction only	Molecular Function: GTP binding (GO:0005525);; Cellular Component: chloroplast (GO:0009507);;	--	[R]	General function prediction only	50S ribosome-binding GTPase;; GTP-binding GTPase N-terminal;; Elongation factor Tu GTP binding domain	GTP-binding protein At3g49725, chloroplastic (Precursor) GN=At3g49725 OS=Arabidopsis thaliana (Mouse-ear cress) PE=2 SV=2	PREDICTED: GTP-binding protein At3g49725, chloroplastic-like [Glycine max]
Glyma.02G280600	--	--	--	--	--	--	--	--	PREDICTED: uncharacterized protein LOC100806971 isoform X1 [Glycine max]
Glyma.02G280700	--	--	Biological Process: mitochondrial fission (GO:0000266);; Cellular Component: mitochondrial outer membrane (GO:0005741);; Cellular Component: peroxisomal membrane (GO:0005778);; Cellular Component: integral component of membrane (GO:0016021);; Biological Process: peroxisome fission (GO:0016559);;	--	[M]	Cell wall/membrane/envelope biogenesis	Fis1 N-terminal tetratricopeptide repeat;; Fis1 C-terminal tetratricopeptide repeat	Mitochondrial fission 1 protein A GN=F24I3.1700 OS=Arabidopsis thaliana (Mouse-ear cress) PE=1 SV=1	Mitochondrial fission 1 protein [Glycine soja]
Glyma.02G280800	--	--	Molecular Function: magnesium ion transmembrane transporter activity (GO:0015095);; Biological Process: magnesium ion transport (GO:0015693);; Cellular Component: integral component of membrane (GO:0016021);;	--	[S]	Function unknown	Magnesium transporter NIPA	Probable magnesium transporter NIPA3 GN=At1g34470 OS=Arabidopsis thaliana (Mouse-ear cress) PE=2 SV=1	PREDICTED: magnesium transporter NIPA2-like [Glycine max]
Glyma.02G281000	[KL]	--	Molecular Function: DNA binding (GO:0003677);; Molecular Function: DNA-directed RNA polymerase activity (GO:0003899);; Molecular Function: ATP binding (GO:0005524);; Cellular Component: nucleus (GO:0005634);; Molecular Function: ATP-dependent helicase activity (GO:0008026);; Cellular Component: plasmodesma (GO:0009506);; Biological Process: RNA biosynthetic process (GO:0032774);;	K11367|0.0|vvi:100261898|hypothetical protein LOC100261898	[K]	Transcription	SNF2 family N-terminal domain;; Domain of unknown function (DUF4208);; Chromo (CHRromatin Organisation MOdifier) domain;; Helicase conserved C-terminal domain	Protein CHROMATIN REMODELING 5 {ECO:0000303|PubMed:16547115} OS=Arabidopsis thaliana (Mouse-ear cress) PE=3 SV=1	PREDICTED: chromodomain-helicase-DNA-binding protein 1-like [Glycine max]
Glyma.02G281100	--	--	Biological Process: polysaccharide biosynthetic process (GO:0000271);; Molecular Function: protein serine/threonine kinase activity (GO:0004674);; Molecular Function: ATP binding (GO:0005524);; Cellular Component: plasma membrane (GO:0005886);; Biological Process: protein phosphorylation (GO:0006468);; Biological Process: multidimensional cell growth (GO:0009825);; Biological Process: determinati…	--	--	--	Protein kinase domain;; Protein tyrosine kinase;; Leucine Rich repeats (2 copies);; Leucine rich repeat;; Leucine Rich Repeat;; Leucine rich repeat;; Leucine Rich repeat	Leucine-rich repeat receptor-like serine/threonine-protein kinase BAM3 (Precursor) GN=BAM3 OS=Arabidopsis thaliana (Mouse-ear cress) PE=2 SV=3	PREDICTED: leucine-rich repeat receptor-like serine/threonine-protein kinase BAM3-like [Glycine max]
Glyma.02G281200	[LKJ]	--	Molecular Function: nucleic acid binding (GO:0003676);; Molecular Function: helicase activity (GO:0004386);; Molecular Function: ATP binding (GO:0005524);; Biological Process: metabolic process (GO:0008152);; Molecular Function: ATPase activity (GO:0016887);;	--	[A]	RNA processing and modification	DEAD/DEAH box helicase;; Helicase conserved C-terminal domain	DEAD-box ATP-dependent RNA helicase 53 GN=RH53 OS=Arabidopsis thaliana (Mouse-ear cress) PE=2 SV=1	PREDICTED: DEAD-box ATP-dependent RNA helicase 53 [Glycine max]
Glyma.02G281300	[G]	Carbohydrate transport and metabolism	Molecular Function: kinase activity (GO:0016301);; Biological Process: phosphorylation (GO:0016310);; Molecular Function: flavonol 3-O-glucosyltransferase activity (GO:0047893);;	--	[G]	Carbohydrate transport and metabolism	BadF/BadG/BcrA/BcrD ATPase family	--	PREDICTED: N-acetyl-D-glucosamine kinase-like [Glycine max]
Glyma.02G281400	--	--	Biological Process: lipid transport (GO:0006869);; Molecular Function: lipid binding (GO:0008289);;	--	--	--	--	Non-specific lipid-transfer protein A OS=Ricinus communis (Castor bean) PE=1 SV=1	uncharacterized protein LOC100306011 precursor [Glycine max]
Glyma.02G281500	--	--	Biological Process: lipid transport (GO:0006869);; Molecular Function: lipid binding (GO:0008289);;	--	--	--	--	Non-specific lipid-transfer protein A OS=Ricinus communis (Castor bean) PE=1 SV=1	Non-specific lipid-transfer protein A [Glycine soja]
Glyma.02G281600	[M]	Cell wall/membrane/envelope biogenesis	Molecular Function: polygalacturonase activity (GO:0004650);; Cellular Component: extracellular region (GO:0005576);; Biological Process: carbohydrate metabolic process (GO:0005975);; Molecular Function: lyase activity (GO:0016829);; Biological Process: cell wall organization (GO:0071555);;	--	--	--	Glycosyl hydrolases family 28	Probable polygalacturonase OS=Vitis vinifera (Grape) PE=1 SV=1	Putative polygalacturonase [Glycine soja]
Glyma.02G281700	--	--	Molecular Function: DNA binding (GO:0003677);; Cellular Component: nucleus (GO:0005634);; Biological Process: regulation of transcription, DNA-templated (GO:0006355);; Biological Process: lipid transport (GO:0006869);; Molecular Function: lipid binding (GO:0008289);; Biological Process: auxin-activated signaling pathway (GO:0009734);; Molecular Function: protein dimerization activity (GO:0046983)…	--	--	--	Auxin response factor;; B3 DNA binding domain;; AUX/IAA family	Auxin response factor 6 GN=ARF6 OS=Arabidopsis thaliana (Mouse-ear cress) PE=1 SV=2	PREDICTED: auxin response factor 6-like [Glycine max]
Glyma.02G281800	--	--	Molecular Function: thymidine kinase activity (GO:0004797);; Cellular Component: mitochondrion (GO:0005739);; Biological Process: deoxyribonucleoside monophosphate biosynthetic process (GO:0009157);;	--	[R]	General function prediction only	PPR repeat family;; PPR repeat;; PPR repeat;; Pentatricopeptide repeat domain;; Tetratricopeptide repeat;; Mitochondrial 28S ribosomal protein S27;; Tetratricopeptide repeat;; Anaphase-promoting complex, cyclosome, subunit 3;; Replication factor C C-terminal domain;; Sensor_kinase_SpoOB-type, alpha-helical domain;; Region in Clathrin and VPS;; Bacterial transcriptional activator domain;; Mitochon…	Pentatricopeptide repeat-containing protein At5g64320, mitochondrial (Precursor) GN=At5g64320 OS=Arabidopsis thaliana (Mouse-ear cress) PE=2 SV=1	PREDICTED: pentatricopeptide repeat-containing protein At5g64320, mitochondrial-like [Glycine max]
Glyma.02G281900	--	--	Biological Process: macromolecule metabolic process (GO:0043170);; Biological Process: single-organism cellular process (GO:0044763);; Biological Process: seed development (GO:0048316);; Biological Process: meristem development (GO:0048507);; Biological Process: regulation of cellular process (GO:0050794);;	--	--	--	--	Putative WEB family protein At1g65010, chloroplastic (Precursor) GN=At1g65010 OS=Arabidopsis thaliana (Mouse-ear cress) PE=1 SV=1	PREDICTED: uncharacterized protein LOC100781106 [Glycine max]
Glyma.02G282000	--	--	Molecular Function: spermine:oxygen oxidoreductase (spermidine-forming) activity (GO:0052901);; Molecular Function: spermidine:oxygen oxidoreductase (3-aminopropanal-forming) activity (GO:0052902);; Molecular Function: N1-acetylspermine:oxygen oxidoreductase (3-acetamidopropanal-forming) activity (GO:0052903);; Molecular Function: N1-acetylspermidine:oxygen oxidoreductase (3-acetamidopropanal-for…	--	[Q]	Secondary metabolites biosynthesis, transport and catabolism	Flavin containing amine oxidoreductase;; NAD(P)-binding Rossmann-like domain;; FAD binding domain;; Pyridine nucleotide-disulphide oxidoreductase;; FAD dependent oxidoreductase;; Pyridine nucleotide-disulphide oxidoreductase;; HI0933-like protein;; Glucose inhibited division protein A	Probable polyamine oxidase 2 GN=PAO2 OS=Arabidopsis thaliana (Mouse-ear cress) PE=2 SV=1	PREDICTED: probable polyamine oxidase 2-like [Glycine max]
Glyma.02G282100	--	--	Molecular Function: protein dimerization activity (GO:0046983);;	--	--	--	Helix-loop-helix DNA-binding domain	Transcription factor PIF4 GN=MFL8.13 OS=Arabidopsis thaliana (Mouse-ear cress) PE=1 SV=1	PREDICTED: transcription factor PIF4-like [Glycine max]
Glyma.02G282200	--	--	--	K08507|1e-75|pop:POPTR_826036|Ca2+ antiporter/cation exchanger	--	--	Membrane fusion protein Use1	--	PREDICTED: uncharacterized protein LOC100793814 isoform X1 [Glycine max]
Glyma.02G282300	--	--	--	--	--	--	--	--	hypothetical protein glysoja_004021 [Glycine soja]
Glyma.02G282400	--	--	Cellular Component: mitochondrion (GO:0005739);; Cellular Component: endoplasmic reticulum membrane (GO:0005789);; Biological Process: protein targeting to membrane (GO:0006612);; Molecular Function: riboflavin kinase activity (GO:0008531);; Biological Process: positive regulation of flavonoid biosynthetic process (GO:0009963);; Biological Process: regulation of plant-type hypersensitive response…	--	[U]	Intracellular trafficking, secretion, and vesicular transport	Reticulon;; Poxvirus poly(A) polymerase nucleotidyltransferase domain	Reticulon-like protein B8 GN=RTNLB8 OS=Arabidopsis thaliana (Mouse-ear cress) PE=2 SV=1	PREDICTED: uncharacterized LOC100500122 isoform X1 [Glycine max]
Glyma.02G282500	--	--	Molecular Function: calcium ion binding (GO:0005509);; Cellular Component: photosystem II oxygen evolving complex (GO:0009654);; Biological Process: photosynthesis (GO:0015979);; Cellular Component: extrinsic component of membrane (GO:0019898);;	K02717|1e-148|pop:POPTR_551203|photosystem II reaction center psbP protein	--	--	PsbP	Oxygen-evolving enhancer protein 2, chloroplastic (Precursor) GN=PSBP OS=Pisum sativum (Garden pea) PE=1 SV=1	PREDICTED: oxygen-evolving enhancer protein 2, chloroplastic-like [Glycine max]
Glyma.02G282600	[R]	General function prediction only	Biological Process: sister chromatid cohesion (GO:0007062);; Biological Process: reciprocal meiotic recombination (GO:0007131);; Biological Process: gravitropism (GO:0009630);; Biological Process: organ morphogenesis (GO:0009887);; Biological Process: tissue development (GO:0009888);; Biological Process: vegetative to reproductive phase transition of meristem (GO:0010228);; Biological Process: re…	--	[S]	Function unknown	WD domain, G-beta repeat;; Eukaryotic translation initiation factor eIF2A	COMPASS-like H3K4 histone methylase component WDR5B {ECO:0000303|PubMed:19567704} OS=Arabidopsis thaliana (Mouse-ear cress) PE=1 SV=1	PREDICTED: WD repeat-containing protein 26-like [Glycine max]
Glyma.02G282700	[L]	Replication, recombination and repair	Molecular Function: nucleic acid binding (GO:0003676);; Molecular Function: helicase activity (GO:0004386);; Molecular Function: ATP binding (GO:0005524);; Biological Process: metabolic process (GO:0008152);;	--	[A]	RNA processing and modification	Helicase associated domain (HA2);; Helicase conserved C-terminal domain;; R3H domain;; Oligonucleotide/oligosaccharide-binding (OB)-fold;; DEAD/DEAH box helicase;; Ankyrin repeats (3 copies)	Probable pre-mRNA-splicing factor ATP-dependent RNA helicase GN=At3g26560 OS=Arabidopsis thaliana (Mouse-ear cress) PE=1 SV=2	PREDICTED: probable ATP-dependent RNA helicase DHX36-like [Glycine max]
Glyma.02G282800	--	--	--	K08496|2e-31|vvi:100258748|hypothetical protein LOC100258748	[U]	Intracellular trafficking, secretion, and vesicular transport	Snare region anchored in the vesicle membrane C-terminus	Membrin-12 GN=MEMB12 OS=Arabidopsis thaliana (Mouse-ear cress) PE=2 SV=1	PREDICTED: membrin-11-like [Glycine max]
Glyma.02G282900	--	--	Molecular Function: DNA binding (GO:0003677);; Molecular Function: chromatin binding (GO:0003682);;	--	--	--	Myb-like DNA-binding domain	Putative Myb family transcription factor At1g14600 GN=At1g14600 OS=Arabidopsis thaliana (Mouse-ear cress) PE=2 SV=2	PREDICTED: putative Myb family transcription factor At1g14600-like [Glycine max]
Glyma.02G283000	--	--	Cellular Component: integral component of membrane (GO:0016021);;	--	[TR]	--	TLC domain	--	PREDICTED: transmembrane protein 56-B-like isoform X1 [Glycine max]
Glyma.02G283200	--	--	--	--	--	--	AAA domain;; AAA domain;; NACHT domain	Proline-rich receptor-like protein kinase PERK8 GN=PERK8 OS=Arabidopsis thaliana (Mouse-ear cress) PE=1 SV=1	hypothetical protein PHAVU_008G196000g [Phaseolus vulgaris]
Glyma.02G283300	--	--	--	--	[R]	General function prediction only	NPR1/NIM1 like defence protein C terminal;; Domain of unknown function (DUF3420);; Ankyrin repeats (3 copies);; Ankyrin repeats (many copies);; BTB/POZ domain;; Ankyrin repeats (many copies);; Ankyrin repeat;; Ankyrin repeat	Regulatory protein NPR3 GN=NPR3 OS=Arabidopsis thaliana (Mouse-ear cress) PE=1 SV=1	PREDICTED: regulatory protein NPR3-like isoform X1 [Glycine max]
Glyma.02G283400	[I]	Lipid transport and metabolism	Biological Process: biosynthetic process (GO:0009058);; Cellular Component: plastid (GO:0009536);; Molecular Function: geranylgeranyl-diphosphate geranylgeranyltransferase activity (GO:0016767);;	K02291|0.0|vvi:100252385|hypothetical protein LOC100252385	[I]	Lipid transport and metabolism	Squalene/phytoene synthase	Phytoene synthase, chloroplastic (Precursor) GN=PSY OS=Daucus carota (Wild carrot) PE=2 SV=1	PREDICTED: phytoene synthase, chloroplastic-like [Glycine max]
Glyma.02G283500	--	--	Biological Process: metabolic process (GO:0008152);; Molecular Function: shikimate O-hydroxycinnamoyltransferase activity (GO:0047172);;	--	--	--	Transferase family	Anthranilate N-benzoyltransferase protein 1 GN=HCBT1 OS=Dianthus caryophyllus (Carnation) PE=1 SV=1	PREDICTED: shikimate O-hydroxycinnamoyltransferase-like [Glycine max]
Glyma.02G283600	--	--	--	--	--	--	--	--	uncharacterized protein LOC100527156 [Glycine max]
Glyma.02G283700	--	--	--	--	--	--	--	--	PREDICTED: uncharacterized protein LOC100818713 isoform X1 [Glycine max]
Glyma.02G283800	[O]	Posttranslational modification, protein turnover, chaperones	Molecular Function: transferase activity (GO:0016740);;	--	[O]	Posttranslational modification, protein turnover, chaperones	Glutathione S-transferase, C-terminal domain;; Glutathione S-transferase, N-terminal domain;; Glutathione S-transferase, N-terminal domain	Glutathione S-transferase F9 GN=F7F1.7 OS=Arabidopsis thaliana (Mouse-ear cress) PE=1 SV=1	PREDICTED: glutathione S-transferase F9-like [Glycine max]
Glyma.02G283900	[O]	Posttranslational modification, protein turnover, chaperones	Molecular Function: glutathione transferase activity (GO:0004364);; Biological Process: metabolic process (GO:0008152);;	K00799|1e-117|vvi:100233043|GST5, GST5tr	[O]	Posttranslational modification, protein turnover, chaperones	Glutathione S-transferase, N-terminal domain;; Glutathione S-transferase, N-terminal domain;; Glutathione S-transferase, C-terminal domain;; Glutathione S-transferase, N-terminal domain;; Glutathione S-transferase, C-terminal domain	Glutathione S-transferase F9 GN=F7F1.7 OS=Arabidopsis thaliana (Mouse-ear cress) PE=1 SV=1	PREDICTED: glutathione S-transferase F9-like [Glycine max]
Glyma.02G284000	--	--	Biological Process: signal transduction (GO:0007165);; Molecular Function: ADP binding (GO:0043531);;	--	--	--	TIR domain;; TIR domain	Toll/interleukin-1 receptor-like protein GN=TIR OS=Arabidopsis thaliana (Mouse-ear cress) PE=1 SV=1	TMV resistance protein N [Glycine soja]
Glyma.02G284100	[S]	Function unknown	Biological Process: signal transduction (GO:0007165);; Molecular Function: ADP binding (GO:0043531);;	--	--	--	NB-ARC domain;; TIR domain;; TIR domain;; Leucine Rich repeats (2 copies)	TMV resistance protein N GN=N OS=Nicotiana glutinosa (Tobacco) PE=1 SV=1	PREDICTED: TMV resistance protein N-like [Glycine max]
Glyma.02G284200	--	--	Biological Process: signal transduction (GO:0007165);; Molecular Function: ADP binding (GO:0043531);;	--	--	--	NB-ARC domain;; TIR domain;; Leucine Rich repeats (2 copies);; Leucine rich repeat;; TIR domain;; Leucine Rich Repeat	TMV resistance protein N GN=N OS=Nicotiana glutinosa (Tobacco) PE=1 SV=1	PREDICTED: TMV resistance protein N-like isoform X1 [Glycine max]
Glyma.02G284300	--	--	Molecular Function: DNA binding (GO:0003677);; Molecular Function: transcription factor activity, sequence-specific DNA binding (GO:0003700);; Cellular Component: nucleus (GO:0005634);; Biological Process: trehalose biosynthetic process (GO:0005992);; Biological Process: regulation of transcription, DNA-templated (GO:0006355);; Biological Process: proline biosynthetic process (GO:0006561);; Biolo…	--	--	--	No apical meristem (NAM) protein	Transcription factor JUNGBRUNNEN 1 GN=F23E6.1 OS=Arabidopsis thaliana (Mouse-ear cress) PE=1 SV=1	PREDICTED: transcription factor JUNGBRUNNEN 1-like isoform X1 [Glycine max]
Glyma.02G284400	--	--	Molecular Function: phospholipid binding (GO:0005543);; Cellular Component: plant-type cell wall (GO:0009505);;	--	--	--	PH domain	WEB family protein At5g16730, chloroplastic (Precursor) GN=At5g16730 OS=Arabidopsis thaliana (Mouse-ear cress) PE=1 SV=1	PREDICTED: nucleoporin nup211-like [Glycine max]
Glyma.02G284500	--	--	Cellular Component: nucleus (GO:0005634);; Biological Process: mitotic nuclear division (GO:0007067);; Biological Process: gamete generation (GO:0007276);; Biological Process: protein ubiquitination (GO:0016567);; Biological Process: regulation of DNA endoreduplication (GO:0032875);; Biological Process: proteasome-mediated ubiquitin-dependent protein catabolic process (GO:0043161);; Biological Pr…	K03352|1e-173|rcu:RCOM_1123640|hypothetical protein	[DO]	--	--	Anaphase-promoting complex subunit 5 GN=APC5 OS=Arabidopsis thaliana (Mouse-ear cress) PE=1 SV=1	PREDICTED: anaphase-promoting complex subunit 5-like [Glycine max]
Glyma.02G284600	[ER]	--	Molecular Function: 4-hydroxyphenylpyruvate dioxygenase activity (GO:0003868);; Biological Process: aromatic amino acid family metabolic process (GO:0009072);; Molecular Function: metal ion binding (GO:0046872);; Biological Process: oxidation-reduction process (GO:0055114);;	K00457|1e-168|pop:POPTR_798588|4-hydroxyphenylpyruvate dioxygenase (EC:1.13.11.27)	[E]	Amino acid transport and metabolism	Glyoxalase/Bleomycin resistance protein/Dioxygenase superfamily;; Glyoxalase/Bleomycin resistance protein/Dioxygenase superfamily	4-hydroxyphenylpyruvate dioxygenase OS=Daucus carota (Wild carrot) PE=2 SV=1	4-hydroxyphenylpyruvate dioxygenase [Glycine max]
Glyma.02G284700	--	--	Biological Process: metabolic process (GO:0008152);; Molecular Function: microtubule-severing ATPase activity (GO:0008568);;	--	[R]	General function prediction only	PPR repeat;; PPR repeat family;; PPR repeat;; Pentatricopeptide repeat domain	Pentatricopeptide repeat-containing protein At1g08070 GN=PCMP-H12 OS=Arabidopsis thaliana (Mouse-ear cress) PE=2 SV=1	PREDICTED: pentatricopeptide repeat-containing protein At3g29230-like [Glycine max]
Glyma.02G284800	--	--	Molecular Function: aspartic-type endopeptidase activity (GO:0004190);; Biological Process: proteolysis (GO:0006508);; Molecular Function: transferase activity (GO:0016740);;	--	[O]	Posttranslational modification, protein turnover, chaperones	Xylanase inhibitor N-terminal;; Xylanase inhibitor C-terminal;; Eukaryotic aspartyl protease	Protein ASPARTIC PROTEASE IN GUARD CELL 1 (Precursor) GN=ASPG1 OS=Arabidopsis thaliana (Mouse-ear cress) PE=1 SV=1	PREDICTED: uncharacterized protein LOC100527007 isoform X1 [Glycine max]
Glyma.02G284900	[J]	Translation, ribosomal structure and biogenesis	Molecular Function: structural constituent of ribosome (GO:0003735);; Cellular Component: ribosome (GO:0005840);; Biological Process: translation (GO:0006412);;	K02882|1e-127|pop:POPTR_813651|hypothetical protein	[J]	Translation, ribosomal structure and biogenesis	Ribosomal L18ae/LX protein domain	60S ribosomal protein L18a GN=RPL18A OS=Castanea sativa (Sweet chestnut) PE=2 SV=1	60S ribosomal protein L18a [Glycine soja]
Glyma.02G285000	--	--	Cellular Component: integral component of membrane (GO:0016021);; Biological Process: oxidation-reduction process (GO:0055114);;	--	[T]	Signal transduction mechanisms	Eukaryotic cytochrome b561	Cytochrome b561 domain-containing protein At4g18260 (Precursor) GN=At4g18260 OS=Arabidopsis thaliana (Mouse-ear cress) PE=2 SV=1	PREDICTED: putative ferric-chelate reductase 1-like isoform X1 [Glycine max]
Glyma.02G285100	--	--	Cellular Component: chloroplast (GO:0009507);; Cellular Component: integral component of membrane (GO:0016021);; Molecular Function: transferase activity (GO:0016740);;	--	--	--	--	--	PREDICTED: uncharacterized protein LOC100776849 [Glycine max]
Glyma.02G285200	--	--	Biological Process: lipid metabolic process (GO:0006629);; Molecular Function: hydrolase activity (GO:0016787);;	--	--	--	Lipase (class 3)	GDSL esterase/lipase At4g10955 GN=At4g10955 OS=Arabidopsis thaliana (Mouse-ear cress) PE=2 SV=1	PREDICTED: GDSL esterase/lipase At4g10955-like [Glycine max]
Glyma.02G285300	--	--	Molecular Function: protein histidine kinase activity (GO:0004673);; Biological Process: peptidyl-histidine phosphorylation (GO:0018106);;	--	--	--	X8 domain	Glucan endo-1,3-beta-glucosidase 12 (Precursor) GN=At4g29360 OS=Arabidopsis thaliana (Mouse-ear cress) PE=1 SV=1	PREDICTED: glucan endo-1,3-beta-glucosidase 12-like [Glycine max]
Glyma.02G285400	--	--	Biological Process: metabolic process (GO:0008152);; Molecular Function: microtubule-severing ATPase activity (GO:0008568);; Cellular Component: plastid (GO:0009536);;	--	[R]	General function prediction only	PPR repeat family;; PPR repeat;; PPR repeat;; Pentatricopeptide repeat domain	Pentatricopeptide repeat-containing protein At2g42920, chloroplastic (Precursor) GN=PCMP-E75 OS=Arabidopsis thaliana (Mouse-ear cress) PE=2 SV=1	PREDICTED: pentatricopeptide repeat-containing protein At2g42920, chloroplastic-like [Glycine max]
Glyma.02G285500	--	--	Biological Process: vegetative to reproductive phase transition of meristem (GO:0010228);; Biological Process: negative regulation of transposition (GO:0010529);; Molecular Function: chromatin DNA binding (GO:0031490);; Biological Process: negative regulation of histone acetylation (GO:0035067);; Biological Process: positive regulation of histone H3-K9 dimethylation (GO:1900111);;	--	--	--	Domain of unknown function (DUF296)	AT-hook motif nuclear-localized protein 16 {ECO:0000312|EMBL:FAA00287.1} OS=Arabidopsis thaliana (Mouse-ear cress) PE=1 SV=1	PREDICTED: putative DNA-binding protein ESCAROLA-like [Glycine max]
Glyma.02G285600	--	--	Cellular Component: membrane (GO:0016020);; Biological Process: metal ion transport (GO:0030001);; Molecular Function: metal ion transmembrane transporter activity (GO:0046873);; Biological Process: transmembrane transport (GO:0055085);;	--	--	--	--	--	PREDICTED: uncharacterized protein LOC100789115 isoform X3 [Glycine max]
Glyma.02G285700	[P]	Inorganic ion transport and metabolism	Biological Process: polysaccharide catabolic process (GO:0000272);; Molecular Function: potassium channel activity (GO:0005267);; Cellular Component: integral component of membrane (GO:0016021);; Biological Process: potassium ion transmembrane transport (GO:0071805);;	--	[P]	Inorganic ion transport and metabolism	Ion channel	Two-pore potassium channel 3 GN=F15J5.130 OS=Arabidopsis thaliana (Mouse-ear cress) PE=2 SV=1	PREDICTED: two-pore potassium channel 3-like [Glycine max]
Glyma.02G285800	--	--	Cellular Component: chloroplast (GO:0009507);;	--	--	--	--	--	PREDICTED: uncharacterized protein LOC100777386 isoform X1 [Glycine max]
Glyma.02G285900	--	--	Molecular Function: transcription factor activity, sequence-specific DNA binding (GO:0003700);; Biological Process: regulation of transcription, DNA-templated (GO:0006355);; Molecular Function: sequence-specific DNA binding (GO:0043565);;	--	--	--	WRKY DNA -binding domain	Probable WRKY transcription factor 71 GN=WRKY71 OS=Arabidopsis thaliana (Mouse-ear cress) PE=2 SV=1	PREDICTED: probable WRKY transcription factor 28-like [Glycine max]
Glyma.02G286000	[RTKL]	--	Biological Process: activation of MAPKK activity (GO:0000186);; Molecular Function: MAP kinase kinase kinase activity (GO:0004709);; Molecular Function: transmembrane receptor protein tyrosine kinase activity (GO:0004714);; Molecular Function: ATP binding (GO:0005524);; Biological Process: peptidyl-tyrosine phosphorylation (GO:0018108);;	--	[T]	Signal transduction mechanisms	Protein kinase domain;; Protein tyrosine kinase	Probable receptor-like protein kinase At2g42960 GN=At2g42960 OS=Arabidopsis thaliana (Mouse-ear cress) PE=3 SV=1	PREDICTED: probable receptor-like protein kinase At2g42960-like isoform X7 [Glycine max]
Glyma.02G286100	[M]	Cell wall/membrane/envelope biogenesis	Cellular Component: Golgi membrane (GO:0000139);; Molecular Function: zinc ion binding (GO:0008270);; Biological Process: pollen germination (GO:0009846);; Cellular Component: integral component of membrane (GO:0016021);; Molecular Function: cellulose synthase (UDP-forming) activity (GO:0016760);; Biological Process: cellulose biosynthetic process (GO:0030244);; Molecular Function: 1,4-beta-D-xyl…	--	--	--	Cellulose synthase;; RING/Ubox like zinc-binding domain;; Glycosyl transferase family group 2;; Glycosyltransferase like family 2	Cellulose synthase-like protein D4 GN=CSLD4 OS=Arabidopsis thaliana (Mouse-ear cress) PE=2 SV=1	PREDICTED: cellulose synthase-like protein D4-like [Glycine max]
Glyma.02G286200	--	--	--	--	--	--	--	--	PREDICTED: uncharacterized protein LOC100779505 [Glycine max]
Glyma.02G286300	--	--	Cellular Component: cytosol (GO:0005829);; Biological Process: intra-Golgi vesicle-mediated transport (GO:0006891);; Cellular Component: Golgi transport complex (GO:0017119);;	--	[U]	Intracellular trafficking, secretion, and vesicular transport	Golgi transport complex subunit 5;; COG (conserved oligomeric Golgi) complex component, COG2	Vegetative cell wall protein gp1 (Precursor) GN=GP1 OS=Chlamydomonas reinhardtii (Chlamydomonas smithii) PE=1 SV=1	PREDICTED: conserved oligomeric Golgi complex subunit 5-like isoform X1 [Glycine max]
Glyma.02G286400	--	--	--	--	--	--	--	GDSL esterase/lipase At4g10955 GN=At4g10955 OS=Arabidopsis thaliana (Mouse-ear cress) PE=2 SV=1	PREDICTED: uncharacterized protein LOC100790698 [Glycine max]
Glyma.02G286500	--	--	Molecular Function: glycerol-3-phosphate O-acyltransferase activity (GO:0004366);; Cellular Component: mitochondrion (GO:0005739);; Biological Process: phosphatidylglycerol biosynthetic process (GO:0006655);; Cellular Component: integral component of membrane (GO:0016021);; Biological Process: CDP-diacylglycerol biosynthetic process (GO:0016024);; Biological Process: pollen sperm cell differentia…	K13508|0.0|pop:POPTR_559475|hypothetical protein	--	--	Acyltransferase	Glycerol-3-phosphate acyltransferase 1 GN=GPAT1 OS=Arabidopsis thaliana (Mouse-ear cress) PE=1 SV=1	PREDICTED: glycerol-3-phosphate acyltransferase 1-like [Glycine max]
Glyma.02G286600	[L]	Replication, recombination and repair	Molecular Function: DNA primase activity (GO:0003896);; Biological Process: DNA replication, synthesis of RNA primer (GO:0006269);; Cellular Component: primosome complex (GO:1990077);;	K02684|0.0|vvi:100260326|hypothetical protein LOC100260326	[L]	Replication, recombination and repair	Eukaryotic and archaeal DNA primase small subunit	--	PREDICTED: DNA primase small subunit [Glycine max]
Glyma.02G286700	--	--	Cellular Component: cell wall (GO:0005618);; Cellular Component: cytoplasm (GO:0005737);; Cellular Component: plasma membrane (GO:0005886);; Biological Process: response to fungus (GO:0009620);; Biological Process: response to nematode (GO:0009624);; Molecular Function: pectinesterase activity (GO:0030599);; Biological Process: indole-containing compound metabolic process (GO:0042430);; Cellular …	K01051|1e-19|rcu:RCOM_0417480|Pectinesterase-3 precursor, putative (EC:3.1.1.11)	--	--	Plant invertase/pectin methylesterase inhibitor	Pectinesterase 3 (Precursor) GN=MLN21.10 OS=Arabidopsis thaliana (Mouse-ear cress) PE=2 SV=2	PREDICTED: pectinesterase/pectinesterase inhibitor 3-like [Glycine max]
Glyma.02G286800	[RTKL]	--	Biological Process: MAPK cascade (GO:0000165);; Molecular Function: MAP kinase activity (GO:0004707);; Molecular Function: ATP binding (GO:0005524);; Biological Process: protein phosphorylation (GO:0006468);; Biological Process: plant-type cell wall organization (GO:0009664);; Biological Process: plant-type cell wall biogenesis (GO:0009832);; Biological Process: regulation of meristem growth (GO:…	--	[T]	Signal transduction mechanisms	Protein kinase domain;; Protein tyrosine kinase;; Lipopolysaccharide kinase (Kdo/WaaP) family	Mitogen-activated protein kinase 10 OS=Oryza sativa subsp. japonica (Rice) PE=2 SV=2	PREDICTED: mitogen-activated protein kinase 20-like isoform X1 [Glycine max]
Glyma.02G286900	--	--	--	--	--	--	--	Transcription factor PAR2 GN=T20N10.200 OS=Arabidopsis thaliana (Mouse-ear cress) PE=3 SV=1	PREDICTED: uncharacterized protein LOC100306089 isoform X1 [Glycine max]
Glyma.02G287000	--	--	--	--	--	--	--	Proline-rich receptor-like protein kinase PERK10 GN=PERK10 OS=Arabidopsis thaliana (Mouse-ear cress) PE=2 SV=2	PREDICTED: myosin-10-like [Glycine max]
Glyma.02G287100	--	--	--	--	--	--	--	Nuclear pore complex protein NUP62 {ECO:0000303|PubMed:21189294} OS=Arabidopsis thaliana (Mouse-ear cress) PE=1 SV=1	PREDICTED: uncharacterized protein LOC100792283 isoform X1 [Glycine max]
Glyma.02G287200	--	--	Molecular Function: hydrolase activity, hydrolyzing O-glycosyl compounds (GO:0004553);; Cellular Component: cell wall (GO:0005618);; Biological Process: cellular glucan metabolic process (GO:0006073);; Molecular Function: xyloglucan:xyloglucosyl transferase activity (GO:0016762);; Cellular Component: apoplast (GO:0048046);; Biological Process: cell wall organization (GO:0071555);;	K08235|1e-119|vvi:100252173|hypothetical protein LOC100252173	--	--	Glycosyl hydrolases family 16;; Xyloglucan endo-transglycosylase (XET) C-terminus	Probable xyloglucan endotransglucosylase/hydrolase protein 16 (Precursor) GN=XTH16 OS=Arabidopsis thaliana (Mouse-ear cress) PE=2 SV=2	PREDICTED: probable xyloglucan endotransglucosylase/hydrolase protein 16-like [Glycine max]
Glyma.02G287300	[Q]	Secondary metabolites biosynthesis, transport and catabolism	Molecular Function: iron ion binding (GO:0005506);; Molecular Function: electron carrier activity (GO:0009055);; Molecular Function: (+)-abscisic acid 8'-hydroxylase activity (GO:0010295);; Molecular Function: heme binding (GO:0020037);; Biological Process: oxidation-reduction process (GO:0055114);;	--	[QI]	--	Cytochrome P450	Taxadiene 5-alpha hydroxylase OS=Taxus cuspidata (Japanese yew) PE=1 SV=2	PREDICTED: taxadiene 5-alpha hydroxylase-like [Glycine max]
Glyma.02G287400	--	--	--	--	--	--	--	Protodermal factor 1 (Precursor) GN=PDF1 OS=Arabidopsis thaliana (Mouse-ear cress) PE=2 SV=1	PREDICTED: leucine-rich repeat extensin-like protein 5-like isoform X1 [Glycine max]
Glyma.02G287500	--	--	Cellular Component: integral component of membrane (GO:0016021);;	--	--	--	--	--	PREDICTED: uncharacterized protein LOC100782197 [Glycine max]
Glyma.02G287600	[M]	Cell wall/membrane/envelope biogenesis	Cellular Component: Golgi membrane (GO:0000139);; Cellular Component: integral component of membrane (GO:0016021);; Biological Process: pectin biosynthetic process (GO:0045489);; Molecular Function: polygalacturonate 4-alpha-galacturonosyltransferase activity (GO:0047262);;	K13648|0.0|vvi:100259182|hypothetical protein LOC100259182	--	--	Glycosyl transferase family 8	Probable galacturonosyltransferase 15 GN=GAUT15 OS=Arabidopsis thaliana (Mouse-ear cress) PE=2 SV=1	PREDICTED: probable galacturonosyltransferase 15-like [Glycine max]
Glyma.02G287700	--	--	Molecular Function: DNA binding (GO:0003677);; Molecular Function: transcription factor activity, sequence-specific DNA binding (GO:0003700);; Cellular Component: nucleus (GO:0005634);; Biological Process: regulation of transcription, DNA-templated (GO:0006355);; Molecular Function: protein dimerization activity (GO:0046983);;	K09264|1e-119|vvi:100232864|MADS1	[K]	Transcription	K-box region;; SRF-type transcription factor (DNA-binding and dimerisation domain)	Agamous-like MADS-box protein AGL5 GN=F7D19.17 OS=Arabidopsis thaliana (Mouse-ear cress) PE=1 SV=1	PREDICTED: agamous-like MADS-box protein AGL5-like isoform X1 [Glycine max]
Glyma.02G287800	[J]	Translation, ribosomal structure and biogenesis	--	K02874|5e-40|rcu:RCOM_0605290|50S ribosomal protein L14, putative	[J]	Translation, ribosomal structure and biogenesis	Ribosomal protein L14p/L23e	50S ribosomal protein HLP, mitochondrial (Precursor) GN=HLP OS=Arabidopsis thaliana (Mouse-ear cress) PE=2 SV=1	PREDICTED: 50S ribosomal protein L14-like [Cicer arietinum]
Glyma.02G287900	--	--	Cellular Component: integral component of membrane (GO:0016021);; Molecular Function: oxidoreductase activity (GO:0016491);; Biological Process: oxidation-reduction process (GO:0055114);;	--	[U]	Intracellular trafficking, secretion, and vesicular transport	TB2/DP1, HVA22 family	HVA22-like protein f GN=HVA22F OS=Arabidopsis thaliana (Mouse-ear cress) PE=2 SV=1	PREDICTED: HVA22-like protein f-like [Glycine max]
Glyma.02G288000	--	--	Molecular Function: DNA binding (GO:0003677);; Biological Process: DNA repair (GO:0006281);;	--	--	--	--	--	PREDICTED: uncharacterized protein LOC102669110 isoform X1 [Glycine max]
Glyma.02G288300	[RTKL]	--	Molecular Function: protein serine/threonine kinase activity (GO:0004674);; Molecular Function: protein serine/threonine/tyrosine kinase activity (GO:0004712);; Molecular Function: ATP binding (GO:0005524);; Cellular Component: plasma membrane (GO:0005886);; Biological Process: protein phosphorylation (GO:0006468);; Biological Process: integrin-mediated signaling pathway (GO:0007229);; Biological…	--	[T]	Signal transduction mechanisms	Protein kinase domain;; Protein tyrosine kinase;; Ankyrin repeats (3 copies);; Ankyrin repeat;; Ankyrin repeats (many copies);; Ankyrin repeat;; Ankyrin repeats (many copies)	Serine/threonine-protein kinase HT1 GN=HT1 OS=Arabidopsis thaliana (Mouse-ear cress) PE=1 SV=1	PREDICTED: dual specificity protein kinase splA-like [Glycine max]
Glyma.02G288400	[H]	Coenzyme transport and metabolism	Biological Process: RNA splicing, via endonucleolytic cleavage and ligation (GO:0000394);; Molecular Function: hexaprenyldihydroxybenzoate methyltransferase activity (GO:0004395);; Cellular Component: mitochondrial envelope (GO:0005740);; Cellular Component: mitochondrial matrix (GO:0005759);; Biological Process: ubiquinone biosynthetic process (GO:0006744);; Molecular Function: 2-polyprenyl-6-me…	K00591|1e-152|pop:POPTR_1098459|hexaprenyldihydroxybenzoate methyltransferase (EC:2.1.1.114)	[H]	Coenzyme transport and metabolism	Methyltransferase domain;; Methyltransferase domain;; Methyltransferase domain;; Methyltransferase domain;; Methyltransferase domain;; Methyltransferase domain;; Ribosomal protein L11 methyltransferase (PrmA);; Mycolic acid cyclopropane synthetase;; ubiE/COQ5 methyltransferase family;; Methyltransferase small domain	Hexaprenyldihydroxybenzoate methyltransferase, mitochondrial (Precursor) GN=F7F1.13 OS=Arabidopsis thaliana (Mouse-ear cress) PE=2 SV=2	uncharacterized protein LOC100783802 [Glycine max]
Glyma.02G288500	[C]	Energy production and conversion	Molecular Function: citrate (Si)-synthase activity (GO:0004108);; Biological Process: tricarboxylic acid cycle (GO:0006099);; Biological Process: cellular carbohydrate metabolic process (GO:0044262);;	K01647|0.0|pop:POPTR_735490|citrate synthase (EC:2.3.3.1)	[C]	Energy production and conversion	Citrate synthase	Citrate synthase, glyoxysomal (Precursor) OS=Cucurbita maxima (Pumpkin) PE=1 SV=1	PREDICTED: citrate synthase, glyoxysomal-like [Glycine max]
Glyma.02G288600	[RTKL]	--	Molecular Function: protein serine/threonine kinase activity (GO:0004674);; Molecular Function: transmembrane receptor protein tyrosine kinase activity (GO:0004714);; Molecular Function: ATP binding (GO:0005524);; Biological Process: peptidyl-tyrosine phosphorylation (GO:0018108);; Molecular Function: 2-alkenal reductase [NAD(P)] activity (GO:0032440);; Biological Process: oxidation-reduction pro…	--	--	--	Di-glucose binding within endoplasmic reticulum;; Protein tyrosine kinase;; Protein kinase domain;; Leucine Rich repeats (2 copies);; Leucine rich repeat;; Leucine Rich Repeat;; Leucine Rich repeat;; Leucine rich repeat	Probable LRR receptor-like serine/threonine-protein kinase At1g07650 (Precursor) GN=At1g07650 OS=Arabidopsis thaliana (Mouse-ear cress) PE=1 SV=1	PREDICTED: probable LRR receptor-like serine/threonine-protein kinase At1g07650-like isoform X1 [Glycine max]
Glyma.02G288700	[O]	Posttranslational modification, protein turnover, chaperones	Cellular Component: peroxisome (GO:0005777);; Biological Process: response to stress (GO:0006950);; Biological Process: photorespiration (GO:0009853);; Biological Process: starch biosynthetic process (GO:0019252);;	K13993|1e-88|vvi:100267696|hypothetical protein LOC100267696	[O]	Posttranslational modification, protein turnover, chaperones	Hsp20/alpha crystallin family	21.9 kDa heat shock protein (Precursor) GN=HSP21.9 OS=Oryza sativa subsp. japonica (Rice) PE=2 SV=1	Small heat shock protein C2 [Glycine soja]
Glyma.02G288800	--	--	--	K13102|0.0|rcu:RCOM_1086480|zinc finger protein, putative	[A]	RNA processing and modification	Domain of Kin17 curved DNA-binding protein	Protein MOS2 GN=MOS2 OS=Arabidopsis thaliana (Mouse-ear cress) PE=2 SV=1	PREDICTED: DNA/RNA-binding protein KIN17-like isoformX1 [Glycine max]
Glyma.02G288900	[K]	Transcription	Molecular Function: RNA binding (GO:0003723);; Cellular Component: nucleus (GO:0005634);; Cellular Component: viral nucleocapsid (GO:0019013);; Cellular Component: intracellular ribonucleoprotein complex (GO:0030529);;	K11086|1e-172|vvi:100257709|hypothetical protein LOC100257709	[K]	Transcription	LSM domain	Formin-like protein 20 GN=MBK20.20/MBK20.21 OS=Arabidopsis thaliana (Mouse-ear cress) PE=2 SV=3	PREDICTED: small nuclear ribonucleoprotein-associated protein B&apos;-like [Glycine max]
Glyma.02G289000	--	--	Molecular Function: cyclin-dependent protein serine/threonine kinase activity (GO:0004693);; Molecular Function: transporter activity (GO:0005215);; Biological Process: transport (GO:0006810);; Biological Process: metabolic process (GO:0008152);; Cellular Component: integral component of membrane (GO:0016021);; Biological Process: regulation of cell cycle (GO:0051726);;	--	[GE]	--	Triose-phosphate Transporter family;; EamA-like transporter family;; UAA transporter family	Glucose-6-phosphate/phosphate translocator 2, chloroplastic (Precursor) GN=GPT2 OS=Arabidopsis thaliana (Mouse-ear cress) PE=2 SV=2	PREDICTED: glucose-6-phosphate/phosphate translocator 2, chloroplastic-like [Glycine max]
Glyma.02G289100	--	--	--	--	--	--	FBD;; F-box domain	Putative F-box/LRR-repeat protein At1g56400 GN=At1g56400 OS=Arabidopsis thaliana (Mouse-ear cress) PE=2 SV=1	PREDICTED: putative F-box/LRR-repeat protein At1g56400-like [Glycine max]
Glyma.02G289200	--	--	--	--	--	--	FBD	Putative F-box/LRR-repeat protein At1g56400 GN=At1g56400 OS=Arabidopsis thaliana (Mouse-ear cress) PE=2 SV=1	PREDICTED: putative F-box/LRR-repeat protein At1g56400-like [Glycine max]
Glyma.02G289300	[R]	General function prediction only	Molecular Function: GTP binding (GO:0005525);; Cellular Component: intracellular (GO:0005622);; Biological Process: small GTPase mediated signal transduction (GO:0007264);; Biological Process: vesicle-mediated transport (GO:0016192);;	--	[R]	General function prediction only	Miro-like protein;; Ras family	Ras-related protein RABF2a GN=K17O22.15 OS=Arabidopsis thaliana (Mouse-ear cress) PE=1 SV=1	Septum-promoting GTP-binding protein 1 [Glycine soja]
Glyma.02G289400	--	--	Biological Process: response to oxidative stress (GO:0006979);; Cellular Component: chloroplast thylakoid membrane (GO:0009535);; Cellular Component: thylakoid lumen (GO:0031977);;	--	[M]	Cell wall/membrane/envelope biogenesis	Lipocalin-like domain;; Lipocalin / cytosolic fatty-acid binding protein family	--	Apolipoprotein D [Glycine soja]
Glyma.02G289500	--	--	--	--	--	--	--	--	PREDICTED: uncharacterized protein LOC100788941 isoform X1 [Glycine max]
Glyma.02G289600	--	--	--	--	--	--	--	--	hypothetical protein PHAVU_008G265500g [Phaseolus vulgaris]
Glyma.02G289700	[L]	Replication, recombination and repair	Molecular Function: DNA binding (GO:0003677);; Molecular Function: DNA-directed DNA polymerase activity (GO:0003887);; Biological Process: DNA-dependent DNA replication (GO:0006261);; Molecular Function: 3'-5' exonuclease activity (GO:0008408);; Biological Process: DNA biosynthetic process (GO:0071897);; Biological Process: nucleic acid phosphodiester bond hydrolysis (GO:0090305);;	K02335|0.0|pop:POPTR_1097327|hypothetical protein	[R]	General function prediction only	DNA polymerase family A;; 3'-5' exonuclease	DNA polymerase I A, chloroplastic/mitochondrial (Precursor) GN=POLIA OS=Arabidopsis thaliana (Mouse-ear cress) PE=2 SV=1	PREDICTED: uncharacterized protein LOC100797016 [Glycine max]
Glyma.02G289800	[RTKL]	--	Molecular Function: protein serine/threonine kinase activity (GO:0004674);; Molecular Function: non-membrane spanning protein tyrosine kinase activity (GO:0004715);; Molecular Function: ATP binding (GO:0005524);; Biological Process: regulation of signal transduction (GO:0009966);; Biological Process: peptidyl-tyrosine phosphorylation (GO:0018108);;	--	[T]	Signal transduction mechanisms	Protein kinase domain;; Protein tyrosine kinase	Serine/threonine-protein kinase PBS1 GN=PBS1 OS=Arabidopsis thaliana (Mouse-ear cress) PE=1 SV=1	PREDICTED: serine/threonine-protein kinase PBS1-like [Glycine max]
Glyma.02G289900	--	--	--	--	--	--	--	--	PREDICTED: uncharacterized protein LOC100789468 isoform X1 [Glycine max]
Glyma.02G290000	[Q]	Secondary metabolites biosynthesis, transport and catabolism	Molecular Function: iron ion binding (GO:0005506);; Molecular Function: (+)-abscisic acid 8'-hydroxylase activity (GO:0010295);; Molecular Function: heme binding (GO:0020037);; Molecular Function: taxane 13-alpha-hydroxylase activity (GO:0050598);; Biological Process: oxidation-reduction process (GO:0055114);;	--	[QI]	--	Cytochrome P450	Taxadiene 5-alpha hydroxylase OS=Taxus cuspidata (Japanese yew) PE=1 SV=2	Taxadiene 5-alpha hydroxylase [Glycine soja]
Glyma.02G290100	[R]	General function prediction only	Molecular Function: acid phosphatase activity (GO:0003993);; Molecular Function: alkaline phosphatase activity (GO:0004035);; Cellular Component: extracellular region (GO:0005576);; Biological Process: proline transport (GO:0015824);; Biological Process: dephosphorylation (GO:0016311);; Molecular Function: metal ion binding (GO:0046872);;	--	[G]	Carbohydrate transport and metabolism	Iron/zinc purple acid phosphatase-like protein C;; Calcineurin-like phosphoesterase	Purple acid phosphatase 18 (Precursor) GN=K10D20.4 OS=Arabidopsis thaliana (Mouse-ear cress) PE=2 SV=1	uncharacterized protein LOC100790529 precursor [Glycine max]
Glyma.02G290200	--	--	--	K14550|0.0|rcu:RCOM_1501550|hypothetical protein	[S]	Function unknown	BP28CT (NUC211) domain;; U3 small nucleolar RNA-associated protein 10	Uncharacterized protein At3g06530 GN=At3g06530 OS=Arabidopsis thaliana (Mouse-ear cress) PE=1 SV=3	PREDICTED: uncharacterized protein At3g06530-like isoform X1 [Glycine max]
Glyma.02G290300	--	--	Biological Process: signal transduction (GO:0007165);;	--	--	--	TIR domain;; TIR domain	Toll/interleukin-1 receptor-like protein GN=TIR OS=Arabidopsis thaliana (Mouse-ear cress) PE=1 SV=1	PREDICTED: uncharacterized protein LOC100791052 [Glycine max]
Glyma.02G290400	--	--	Biological Process: signal transduction (GO:0007165);;	--	--	--	TIR domain;; TIR domain	TMV resistance protein N GN=N OS=Nicotiana glutinosa (Tobacco) PE=1 SV=1	toll interleukin receptor [Glycine max]
Glyma.02G290500	[LKJ]	--	Molecular Function: RNA binding (GO:0003723);; Molecular Function: ATP binding (GO:0005524);; Cellular Component: nucleolus (GO:0005730);; Biological Process: protein import into nucleus (GO:0006606);; Molecular Function: ATP-dependent helicase activity (GO:0008026);; Biological Process: metabolic process (GO:0008152);;	--	[A]	RNA processing and modification	DEAD/DEAH box helicase;; Helicase conserved C-terminal domain;; Domain of unknown function (DUF4217)	DEAD-box ATP-dependent RNA helicase 32 GN=RH32 OS=Arabidopsis thaliana (Mouse-ear cress) PE=2 SV=1	PREDICTED: DEAD-box ATP-dependent RNA helicase 32-like isoform X1 [Glycine max]
Glyma.02G290600	--	--	Biological Process: post-embryonic development (GO:0009791);; Biological Process: reproductive structure development (GO:0048608);;	--	--	--	--	--	PREDICTED: uncharacterized protein LOC100798619 [Glycine max]
Glyma.02G290700	--	--	--	--	--	--	--	Uncharacterized protein At5g41620 GN=At5g41620 OS=Arabidopsis thaliana (Mouse-ear cress) PE=2 SV=2	PREDICTED: uncharacterized protein LOC100799140 [Glycine max]
Glyma.02G290800	[O]	Posttranslational modification, protein turnover, chaperones	Biological Process: response to oxidative stress (GO:0006979);; Molecular Function: peptide-methionine (S)-S-oxide reductase activity (GO:0008113);; Biological Process: protein repair (GO:0030091);; Biological Process: oxidation-reduction process (GO:0055114);;	K07304|1e-133|pop:POPTR_824833|PtrcMsrA3	[O]	Posttranslational modification, protein turnover, chaperones	Peptide methionine sulfoxide reductase	Peptide methionine sulfoxide reductase OS=Lactuca sativa (Garden lettuce) PE=2 SV=1	PREDICTED: uncharacterized protein LOC100792638 isoform X2 [Glycine max]
Glyma.02G290900	--	--	--	--	--	--	--	--	PREDICTED: uncharacterized protein LOC100793166 [Glycine max]
Glyma.02G291000	[O]	Posttranslational modification, protein turnover, chaperones	Cellular Component: cytosol (GO:0005829);; Biological Process: proteolysis (GO:0006508);; Molecular Function: peptidase activity (GO:0008233);;	K13719|1e-118|rcu:RCOM_0082100|cysteine-type peptidase, putative	[TO]	--	OTU-like cysteine protease	--	PREDICTED: ubiquitin thioesterase OTU1-like isoform 1 [Glycine max]
Glyma.02G291100	[J]	Translation, ribosomal structure and biogenesis	Cellular Component: mitochondrion (GO:0005739);; Cellular Component: vacuole (GO:0005773);; Biological Process: gluconeogenesis (GO:0006094);; Biological Process: glycolytic process (GO:0006096);; Cellular Component: chloroplast stroma (GO:0009570);; Cellular Component: thylakoid (GO:0009579);; Biological Process: response to salt stress (GO:0009651);; Cellular Component: chloroplast envelope (GO…	--	[J]	Translation, ribosomal structure and biogenesis	Endoribonuclease L-PSP	Reactive Intermediate Deaminase A, chloroplastic {ECO:0000303|PubMed:25070638} (Precursor) OS=Arabidopsis thaliana (Mouse-ear cress) PE=1 SV=1	uncharacterized protein LOC100527559 [Glycine max]
Glyma.02G291200	--	--	Biological Process: metabolic process (GO:0008152);; Molecular Function: zinc ion binding (GO:0008270);; Molecular Function: ligase activity (GO:0016874);;	--	[O]	Posttranslational modification, protein turnover, chaperones	Ring finger domain;; RING-H2 zinc finger;; Zinc finger, C3HC4 type (RING finger);; Zinc finger, C3HC4 type (RING finger);; Anaphase-promoting complex subunit 11 RING-H2 finger;; Zinc finger, C3HC4 type (RING finger)	NEP1-interacting protein 1 GN=F4B14.110 OS=Arabidopsis thaliana (Mouse-ear cress) PE=1 SV=2	NEP1-interacting protein 1 [Glycine soja]
Glyma.02G291300	[RTKL]	--	Molecular Function: calmodulin-dependent protein kinase activity (GO:0004683);; Molecular Function: calcium ion binding (GO:0005509);; Molecular Function: ATP binding (GO:0005524);; Biological Process: protein phosphorylation (GO:0006468);;	K13412|0.0|rcu:RCOM_0082230|calcium-dependent protein kinase, putative (EC:2.7.11.17)	[T]	Signal transduction mechanisms	Protein kinase domain;; EF hand;; EF-hand domain pair;; Protein tyrosine kinase;; EF-hand domain pair;; EF-hand domain;; EF hand;; Cytoskeletal-regulatory complex EF hand;; Secreted protein acidic and rich in cysteine Ca binding region;; Kinase-like	Calcium-dependent protein kinase 9 GN=CPK9 OS=Arabidopsis thaliana (Mouse-ear cress) PE=1 SV=1	PREDICTED: calcium-dependent protein kinase 9-like isoform 1 [Glycine max]
Glyma.02G291400	--	--	Molecular Function: DNA binding (GO:0003677);; Cellular Component: nucleus (GO:0005634);; Biological Process: regulation of transcription, DNA-templated (GO:0006355);;	--	--	--	Domain of unknown function (DUF313)	B3 domain-containing protein At5g24050 GN=At5g24050 OS=Arabidopsis thaliana (Mouse-ear cress) PE=2 SV=1	PREDICTED: B3 domain-containing protein At3g25182-like [Glycine max]
Glyma.02G291500	[J]	Translation, ribosomal structure and biogenesis	Molecular Function: translation initiation factor activity (GO:0003743);; Biological Process: translational initiation (GO:0006413);;	--	[J]	Translation, ribosomal structure and biogenesis	Translation initiation factor SUI1	Protein translation factor SUI1 homolog OS=Pimpinella brachycarpa PE=3 SV=1	Protein translation factor SUI1 like [Glycine soja]
Glyma.02G291600	--	--	Molecular Function: SNAP receptor activity (GO:0005484);; Cellular Component: trans-Golgi network (GO:0005802);; Biological Process: protein targeting to vacuole (GO:0006623);; Biological Process: abscisic acid-activated signaling pathway (GO:0009738);; Cellular Component: integral component of membrane (GO:0016021);; Cellular Component: late endosome membrane (GO:0031902);; Biological Process: G…	K08498|2e-90|pop:POPTR_817835|hypothetical protein	[U]	Intracellular trafficking, secretion, and vesicular transport	Syntaxin 6, N-terminal	Syntaxin-61 GN=F3M18.7 OS=Arabidopsis thaliana (Mouse-ear cress) PE=1 SV=1	uncharacterized protein LOC100795447 [Glycine max]
Glyma.02G291700	--	--	--	--	--	--	Senescence regulator	--	uncharacterized protein LOC100796494 [Glycine max]
Glyma.02G291800	--	--	Biological Process: response to high light intensity (GO:0009644);; Biological Process: response to hydrogen peroxide (GO:0042542);;	--	--	--	--	F-box protein SKP2B GN=F22K20.10 OS=Arabidopsis thaliana (Mouse-ear cress) PE=1 SV=1	hypothetical protein glysoja_003936 [Glycine soja]
Glyma.02G291900	--	--	Cellular Component: mitochondrial matrix (GO:0005759);;	--	[C]	Energy production and conversion	Mitochondrial glycoprotein	Uncharacterized protein At2g39795, mitochondrial (Precursor) GN=At2g39795 OS=Arabidopsis thaliana (Mouse-ear cress) PE=2 SV=1	uncharacterized protein LOC100527468 [Glycine max]
Glyma.02G292000	--	--	Molecular Function: carbamoyl-phosphate synthase (glutamine-hydrolyzing) activity (GO:0004088);; Biological Process: metabolic process (GO:0008152);; Cellular Component: membrane (GO:0016020);;	--	--	--	Protein of unknown function DUF260	LOB domain-containing protein 24 GN=MLJ15.5 OS=Arabidopsis thaliana (Mouse-ear cress) PE=2 SV=1	LOB domain-containing protein 24 [Glycine soja]
Glyma.02G292200	[L]	Replication, recombination and repair	Cellular Component: condensed nuclear chromosome (GO:0000794);; Molecular Function: ATP binding (GO:0005524);; Biological Process: double-strand break repair (GO:0006302);; Biological Process: mitotic recombination (GO:0006312);; Biological Process: sister chromatid cohesion (GO:0007062);; Biological Process: cytokinin biosynthetic process (GO:0009691);; Biological Process: response to gamma radi…	K08741|0.0|vvi:100252044|hypothetical protein LOC100252044	[L]	Replication, recombination and repair	MutS domain V;; MutS domain III;; MutS family domain IV	DNA mismatch repair protein MSH5 GN=MSH5 OS=Arabidopsis thaliana (Mouse-ear cress) PE=2 SV=1	PREDICTED: DNA mismatch repair protein MSH5-like isoform X1 [Glycine max]
Glyma.02G292300	--	--	--	--	[S]	Function unknown	Rab3 GTPase-activating protein catalytic subunit	--	PREDICTED: uncharacterized protein LOC100798096 isoform X4 [Glycine max]
Glyma.02G292400	--	--	--	--	[S]	Function unknown	--	--	PREDICTED: uncharacterized protein LOC100798628 [Glycine max]
Glyma.02G292500	[C]	Energy production and conversion	Molecular Function: dihydrolipoyllysine-residue succinyltransferase activity (GO:0004149);; Biological Process: tricarboxylic acid cycle (GO:0006099);; Cellular Component: oxoglutarate dehydrogenase complex (GO:0045252);;	K00658|0.0|rcu:RCOM_1303600|dihydrolipoamide succinyltransferase component of 2-oxoglutarate dehydrogenase, putative (EC:2.3.1.61)	[C]	Energy production and conversion	2-oxoacid dehydrogenases acyltransferase (catalytic domain);; Biotin-requiring enzyme;; Biotin-lipoyl like	Dihydrolipoyllysine-residue succinyltransferase component of 2-oxoglutarate dehydrogenase complex 2, mitochondrial (Precursor) GN=At4g26910 OS=Arabidopsis thaliana (Mouse-ear cress) PE=2 SV=2	PREDICTED: dihydrolipoyllysine-residue succinyltransferase component of 2-oxoglutarate dehydrogenase complex 2, mitochondrial-like [Glycine max]
Glyma.02G292600	--	--	Cellular Component: endoplasmic reticulum (GO:0005783);; Biological Process: intracellular protein transport (GO:0006886);; Cellular Component: integral component of membrane (GO:0016021);;	--	[V]	Defense mechanisms	B-cell receptor-associated protein 31-like	--	hypothetical protein glysoja_003929 [Glycine soja]
Glyma.02G292700	--	--	--	--	--	--	Stigma-specific protein, Stig1	Stigma-specific STIG1-like protein 4 {ECO:0000303|PubMed:19279211} (Precursor) OS=Arabidopsis thaliana (Mouse-ear cress) PE=3 SV=1	PREDICTED: chitin-binding lectin 1-like [Glycine max]
Glyma.02G292800	--	--	Biological Process: metabolic process (GO:0008152);; Molecular Function: nucleotidyltransferase activity (GO:0016779);; Molecular Function: GDP-D-glucose phosphorylase activity (GO:0080048);;	K14190|0.0|rcu:RCOM_0278070|hypothetical protein	[R]	General function prediction only	--	GDP-L-galactose phosphorylase 1 GN=VTC2 OS=Arabidopsis thaliana (Mouse-ear cress) PE=1 SV=1	PREDICTED: GDP-L-galactose phosphorylase 1-like [Glycine max]
Glyma.02G292900	[R]	General function prediction only	Molecular Function: nucleic acid binding (GO:0003676);; Molecular Function: metal ion binding (GO:0046872);;	--	[R]	General function prediction only	Zinc finger, C2H2 type;; C2H2-type zinc finger;; Zinc-finger double domain	Probable lysine-specific demethylase ELF6 GN=F21E1.160 OS=Arabidopsis thaliana (Mouse-ear cress) PE=1 SV=1	PREDICTED: zinc finger protein 141-like [Glycine max]
Glyma.02G293000	--	--	--	--	--	--	--	--	PREDICTED: uncharacterized protein LOC102662647 [Glycine max]
Glyma.02G293100	[R]	General function prediction only	--	K12606|0.0|pop:POPTR_805875|hypothetical protein	[R]	General function prediction only	Cell differentiation family, Rcd1-like	--	PREDICTED: cell differentiation protein RCD1 homolog [Glycine max]
Glyma.02G293200	--	--	Molecular Function: RNA binding (GO:0003723);; Biological Process: RNA processing (GO:0006396);;	--	[A]	RNA processing and modification	Surp module	Splicing factor U2af large subunit A GN=U2AF65A OS=Triticum aestivum (Wheat) PE=2 SV=1	PREDICTED: splicing factor, suppressor of white-apricot homolog isoform X2 [Glycine max]
Glyma.02G293300	[R]	General function prediction only	Molecular Function: nucleic acid binding (GO:0003676);; Molecular Function: metal ion binding (GO:0046872);;	--	[R]	General function prediction only	Zinc finger, C2H2 type;; C2H2-type zinc finger;; Zinc-finger double domain	Probable lysine-specific demethylase ELF6 GN=F21E1.160 OS=Arabidopsis thaliana (Mouse-ear cress) PE=1 SV=1	PREDICTED: zinc finger protein 84-like [Glycine max]
Glyma.02G293400	--	--	--	--	--	--	WRKY DNA -binding domain	Probable WRKY transcription factor 31 GN=WRKY31 OS=Arabidopsis thaliana (Mouse-ear cress) PE=2 SV=1	PREDICTED: probable WRKY transcription factor 31-like [Glycine max]
Glyma.02G293500	[F]	Nucleotide transport and metabolism	Molecular Function: aspartate carbamoyltransferase activity (GO:0004070);; Cellular Component: cytosol (GO:0005829);; Biological Process: purine nucleotide biosynthetic process (GO:0006164);; Biological Process: 'de novo' pyrimidine nucleobase biosynthetic process (GO:0006207);; Biological Process: cellular amino acid metabolic process (GO:0006520);; Cellular Component: chloroplast stroma (GO:000…	K00609|0.0|rcu:RCOM_0753060|Aspartate carbamoyltransferase 2, chloroplast precursor, putative (EC:2.1.3.2)	[R]	General function prediction only	Aspartate/ornithine carbamoyltransferase, carbamoyl-P binding domain;; Aspartate/ornithine carbamoyltransferase, Asp/Orn binding domain	Aspartate carbamoyltransferase 1, chloroplastic (Precursor) GN=PYRB1 OS=Pisum sativum (Garden pea) PE=2 SV=1	PREDICTED: aspartate carbamoyltransferase 1, chloroplastic-like isoform X1 [Glycine max]
Glyma.02G293600	[H]	Coenzyme transport and metabolism	Biological Process: tRNA wobble position uridine thiolation (GO:0002143);; Molecular Function: thiosulfate sulfurtransferase activity (GO:0004792);; Molecular Function: ATP binding (GO:0005524);; Cellular Component: cytosol (GO:0005829);; Biological Process: Mo-molybdopterin cofactor biosynthetic process (GO:0006777);; Molecular Function: Mo-molybdopterin cofactor sulfurase activity (GO:0008265);…	K11996|0.0|rcu:RCOM_0753070|ubiquitin-activating enzyme E1, putative	[H]	Coenzyme transport and metabolism	ThiF family;; MoeZ/MoeB domain;; Rhodanese-like domain	Molybdopterin-synthase sulfurtransferase {ECO:0000255|HAMAP-Rule:MF_03049} GN=MCO15.8 OS=Arabidopsis thaliana (Mouse-ear cress) PE=2 SV=1	Adenylyltransferase and sulfurtransferase MOCS3 [Glycine soja]
Glyma.02G293700	--	--	--	--	--	--	--	--	uncharacterized protein LOC100527650 [Glycine max]
Glyma.02G293900	--	--	Molecular Function: cellulase activity (GO:0008810);; Biological Process: cellulose catabolic process (GO:0030245);;	--	--	--	Glycosyl hydrolase family 9	Endoglucanase 11 (Precursor) GN=At2g32990 OS=Arabidopsis thaliana (Mouse-ear cress) PE=2 SV=1	PREDICTED: endoglucanase 11-like [Glycine max]
Glyma.02G294000	--	--	Molecular Function: protein histidine kinase activity (GO:0004673);; Biological Process: carbohydrate metabolic process (GO:0005975);; Biological Process: peptidyl-histidine phosphorylation (GO:0018106);; Molecular Function: glucan endo-1,3-beta-D-glucosidase activity (GO:0042973);;	--	--	--	Glycosyl hydrolases family 17;; X8 domain	Glucan endo-1,3-beta-glucosidase 12 (Precursor) GN=At4g29360 OS=Arabidopsis thaliana (Mouse-ear cress) PE=1 SV=1	PREDICTED: glucan endo-1,3-beta-glucosidase 12-like [Glycine max]
Glyma.02G294100	--	--	Molecular Function: DNA binding (GO:0003677);; Molecular Function: transcription factor activity, sequence-specific DNA binding (GO:0003700);; Cellular Component: nucleus (GO:0005634);; Biological Process: regulation of transcription, DNA-templated (GO:0006355);;	K09286|2e-86|rcu:RCOM_0546450|Ethylene-responsive transcription factor, putative	--	--	AP2 domain	Ethylene-responsive transcription factor 3 GN=ERF3 OS=Nicotiana tabacum (Common tobacco) PE=2 SV=1	PREDICTED: ethylene-responsive transcription factor 3-like [Glycine max]
Glyma.02G294200	--	--	Molecular Function: GTPase activity (GO:0003924);; Molecular Function: calcium ion binding (GO:0005509);; Molecular Function: GTP binding (GO:0005525);; Cellular Component: endosome (GO:0005768);; Biological Process: protein targeting to vacuole (GO:0006623);; Biological Process: endocytosis (GO:0006897);; Biological Process: metabolic process (GO:0008152);; Cellular Component: plasmodesma (GO:00…	--	[TU]	--	Dynamin family;; 50S ribosome-binding GTPase;; Cytoskeletal-regulatory complex EF hand;; EF-hand domain pair;; Elongation factor Tu GTP binding domain;; EF hand;; Miro-like protein	EH domain-containing protein 1 {ECO:0000303|PubMed:18547399} OS=Arabidopsis thaliana (Mouse-ear cress) PE=1 SV=1	PREDICTED: EH domain-containing protein 1-like [Glycine max]
Glyma.02G294300	--	--	--	--	[S]	Function unknown	Domain of unknown function (DUF2431)	Uncharacterized protein At4g26485 GN=At4g26485 OS=Arabidopsis thaliana (Mouse-ear cress) PE=4 SV=1	PREDICTED: uncharacterized protein At4g26485-like [Glycine max]
Glyma.02G294400	--	--	--	--	--	--	--	Uncharacterized protein At2g33490 GN=At2g33490 OS=Arabidopsis thaliana (Mouse-ear cress) PE=4 SV=2	Hypothetical protein glysoja_045562 [Glycine soja]
Glyma.02G294500	[C]	Energy production and conversion	Molecular Function: pyruvate dehydrogenase (acetyl-transferring) activity (GO:0004739);; Biological Process: acetyl-CoA biosynthetic process from pyruvate (GO:0006086);; Biological Process: oxidation-reduction process (GO:0055114);;	K00162|0.0|pop:POPTR_414358|pyruvate dehydrogenase (acetyl-transferring) (EC:1.2.4.1)	[C]	Energy production and conversion	Transketolase, pyrimidine binding domain;; Transketolase, C-terminal domain	Pyruvate dehydrogenase E1 component subunit beta, mitochondrial (Precursor) OS=Pisum sativum (Garden pea) PE=2 SV=1	PREDICTED: uncharacterized protein LOC100805001 isoform X1 [Glycine max]
Glyma.02G294600	[O]	Posttranslational modification, protein turnover, chaperones	Molecular Function: adenyl-nucleotide exchange factor activity (GO:0000774);; Cellular Component: mitochondrial matrix (GO:0005759);; Biological Process: protein folding (GO:0006457);; Molecular Function: isomerase activity (GO:0016853);; Molecular Function: protein homodimerization activity (GO:0042803);; Biological Process: regulation of catalytic activity (GO:0050790);; Molecular Function: cha…	K03687|1e-119|rcu:RCOM_0546720|Protein grpE, putative (EC:5.1.3.1)	[O]	Posttranslational modification, protein turnover, chaperones	GrpE	--	Protein grpE [Glycine soja]
Glyma.02G294700	--	--	Cellular Component: cell wall (GO:0005618);; Biological Process: metabolic process (GO:0008152);; Molecular Function: pectinesterase activity (GO:0030599);; Biological Process: cell wall modification (GO:0042545);; Molecular Function: aspartyl esterase activity (GO:0045330);;	--	--	--	Pectinesterase	Probable pectinesterase 66 (Precursor) GN=T8I13.12 OS=Arabidopsis thaliana (Mouse-ear cress) PE=2 SV=2	PREDICTED: probable pectinesterase 66-like [Glycine max]
Glyma.02G294800	--	--	--	--	--	--	F-box domain	F-box/LRR-repeat protein 13 GN=FBL13 OS=Arabidopsis thaliana (Mouse-ear cress) PE=2 SV=1	PREDICTED: F-box/LRR-repeat protein 13-like [Glycine max]
Glyma.02G294900	[O]	Posttranslational modification, protein turnover, chaperones	Biological Process: maltose metabolic process (GO:0000023);; Biological Process: protein peptidyl-prolyl isomerization (GO:0000413);; Molecular Function: peptidyl-prolyl cis-trans isomerase activity (GO:0003755);; Biological Process: protein folding (GO:0006457);; Cellular Component: chloroplast stroma (GO:0009570);; Biological Process: chloroplast relocation (GO:0009902);; Cellular Component: ch…	--	--	--	Bacterial trigger factor protein (TF) C-terminus;; Bacterial trigger factor protein (TF);; FKBP-type peptidyl-prolyl cis-trans isomerase	Trigger factor-like protein TIG, Chloroplastic (Precursor) GN=TIG OS=Arabidopsis thaliana (Mouse-ear cress) PE=2 SV=1	PREDICTED: trigger factor-like protein TIG-like isoform X2 [Glycine max]
Glyma.02G295000	[I]	Lipid transport and metabolism	Molecular Function: phosphatidate cytidylyltransferase activity (GO:0004605);; Cellular Component: integral component of membrane (GO:0016021);; Biological Process: CDP-diacylglycerol biosynthetic process (GO:0016024);;	K00981|0.0|vvi:100262389|hypothetical protein LOC100262389	[I]	Lipid transport and metabolism	Cytidylyltransferase family	Phosphatidate cytidylyltransferase 1 {ECO:0000303|PubMed:9085581} OS=Solanum tuberosum (Potato) PE=1 SV=1	PREDICTED: phosphatidate cytidylyltransferase-like [Glycine max]
Glyma.02G295100	--	--	Biological Process: microtubule cytoskeleton organization (GO:0000226);; Biological Process: cytokinesis (GO:0000910);; Molecular Function: microtubule binding (GO:0008017);;	--	[DZ]	--	Microtubule associated protein (MAP65/ASE1 family)	65-kDa microtubule-associated protein 1 GN=MAP65-1 OS=Arabidopsis thaliana (Mouse-ear cress) PE=1 SV=1	PREDICTED: 65-kDa microtubule-associated protein 1 isoform X1 [Glycine max]
Glyma.02G295200	--	--	Biological Process: vesicle-mediated transport (GO:0016192);;	K12199|1e-129|rcu:RCOM_0546870|Protein C6orf55, putative	[S]	Function unknown	Vta1 like	Protein HOMOLOG OF MAMMALIAN LYST-INTERACTING PROTEIN 5 {ECO:0000303|PubMed:17468262} OS=Arabidopsis thaliana (Mouse-ear cress) PE=1 SV=1	PREDICTED: vacuolar protein sorting-associated protein VTA1 homolog [Glycine max]
Glyma.02G295300	--	--	Molecular Function: magnesium ion binding (GO:0000287);; Biological Process: polarity specification of adaxial/abaxial axis (GO:0009944);; Biological Process: auxin homeostasis (GO:0010252);; Biological Process: glucuronoxylan metabolic process (GO:0010413);; Molecular Function: jasmonate O-methyltransferase activity (GO:0030795);; Biological Process: methylation (GO:0032259);; Molecular Function…	--	--	--	SAM dependent carboxyl methyltransferase	Indole-3-acetate O-methyltransferase 1 GN=IAMT1 OS=Arabidopsis thaliana (Mouse-ear cress) PE=1 SV=1	PREDICTED: indole-3-acetate O-methyltransferase 1-like isoform X1 [Glycine max]
Glyma.02G295400	--	--	Molecular Function: chromatin binding (GO:0003682);; Molecular Function: zinc ion binding (GO:0008270);;	--	--	--	PHD-finger	PHD finger protein At3g20280 GN=At3g20280 OS=Arabidopsis thaliana (Mouse-ear cress) PE=2 SV=1	PREDICTED: uncharacterized protein LOC100807139 [Glycine max]
Glyma.02G295500	--	--	Molecular Function: lipid binding (GO:0008289);;	--	[V]	Defense mechanisms	LBP / BPI / CETP family, C-terminal domain;; LBP / BPI / CETP family, N-terminal domain	Putative BPI/LBP family protein At1g04970 (Precursor) GN=At1g04970 OS=Arabidopsis thaliana (Mouse-ear cress) PE=2 SV=1	Putative BPI/LBP family protein [Glycine soja]
Glyma.02G295600	[T]	Signal transduction mechanisms	Molecular Function: phosphoprotein phosphatase activity (GO:0004721);; Biological Process: dephosphorylation (GO:0016311);;	K01090|0.0|pop:POPTR_822885|hypothetical protein	[GT]	--	Calcineurin-like phosphoesterase	Serine/threonine-protein phosphatase PP-X isozyme 2 GN=PPX2 OS=Arabidopsis thaliana (Mouse-ear cress) PE=2 SV=2	PREDICTED: serine/threonine-protein phosphatase PP-X isozyme 2-like [Glycine max]
Glyma.02G295700	--	--	Cellular Component: membrane (GO:0016020);; Biological Process: vesicle-mediated transport (GO:0016192);;	--	[U]	Intracellular trafficking, secretion, and vesicular transport	--	Syntaxin-51 GN=SYP51 OS=Arabidopsis thaliana (Mouse-ear cress) PE=1 SV=1	PREDICTED: syntaxin-51-like [Glycine max]
Glyma.02G295800	[D]	Cell cycle control, cell division, chromosome partitioning	Molecular Function: GTPase activity (GO:0003924);; Molecular Function: GTP binding (GO:0005525);; Cellular Component: microtubule (GO:0005874);; Biological Process: microtubule-based process (GO:0007017);; Biological Process: cell cycle (GO:0007049);; Biological Process: pyrimidine ribonucleotide biosynthetic process (GO:0009220);; Cellular Component: chloroplast thylakoid membrane (GO:0009535);;…	K03531|0.0|vvi:100243513|hypothetical protein LOC100243513	--	--	Tubulin/FtsZ family, GTPase domain;; FtsZ family, C-terminal domain	Cell division protein FtsZ homolog 1, chloroplastic (Precursor) GN=At5g55280 OS=Arabidopsis thaliana (Mouse-ear cress) PE=1 SV=2	PREDICTED: cell division protein FtsZ homolog 1, chloroplastic-like [Glycine max]
Glyma.02G295900	--	--	Molecular Function: hydrogen ion transmembrane transporter activity (GO:0015078);; Biological Process: ATP hydrolysis coupled proton transport (GO:0015991);; Cellular Component: proton-transporting V-type ATPase, V0 domain (GO:0033179);;	K02153|8e-41|pop:POPTR_815748|hypothetical protein	[C]	Energy production and conversion	ATP synthase subunit H	V-type proton ATPase subunit e2 GN=F10M23.50 OS=Arabidopsis thaliana (Mouse-ear cress) PE=2 SV=1	PREDICTED: V-type proton ATPase subunit e [Glycine max]
Glyma.02G296000	[M]	Cell wall/membrane/envelope biogenesis	Biological Process: metabolic process (GO:0008152);; Molecular Function: transferase activity, transferring acyl groups (GO:0016746);;	--	--	--	Membrane bound O-acyl transferase family	Probable long-chain-alcohol O-fatty-acyltransferase 5 GN=AT5 OS=Arabidopsis thaliana (Mouse-ear cress) PE=2 SV=1	uncharacterized protein LOC100809798 [Glycine max]
Glyma.02G296100	--	--	--	--	--	--	--	Stomatal closure-related actin-binding protein 1 {ECO:0000303|PubMed:21719691} OS=Arabidopsis thaliana (Mouse-ear cress) PE=1 SV=1	hypothetical protein glysoja_013803 [Glycine soja]
Glyma.02G296200	--	--	Molecular Function: zinc ion binding (GO:0008270);; Molecular Function: histone-lysine N-methyltransferase activity (GO:0018024);; Biological Process: histone lysine methylation (GO:0034968);; Biological Process: regulation of biological process (GO:0050789);;	--	--	--	Cytosine specific DNA methyltransferase replication foci domain;; PHD-finger	Protein ENHANCED DOWNY MILDEW 2 {ECO:0000303|PubMed:23940361} OS=Arabidopsis thaliana (Mouse-ear cress) PE=1 SV=1	PREDICTED: uncharacterized protein LOC100806429 isoform X4 [Glycine max]
Glyma.02G296300	[Z]	Cytoskeleton	Molecular Function: actin binding (GO:0003779);;	--	[Z]	Cytoskeleton	Calponin homology (CH) domain;; CAMSAP CH domain	Fimbrin-1 {ECO:0000303|PubMed:11123801} OS=Arabidopsis thaliana (Mouse-ear cress) PE=1 SV=2	PREDICTED: fimbrin-1-like isoform X1 [Glycine max]
Glyma.02G296400	[C]	Energy production and conversion	Biological Process: glycerol metabolic process (GO:0006071);; Biological Process: lipid metabolic process (GO:0006629);; Molecular Function: glycerophosphodiester phosphodiesterase activity (GO:0008889);;	--	[C]	Energy production and conversion	Glycerophosphoryl diester phosphodiesterase family	Glycerophosphodiester phosphodiesterase GDPDL1 {ECO:0000305} (Precursor) GN=F1O19.5 OS=Arabidopsis thaliana (Mouse-ear cress) PE=1 SV=2	PREDICTED: probable glycerophosphoryl diester phosphodiesterase 3-like [Glycine max]
Glyma.02G296500	--	--	Cellular Component: nucleus (GO:0005634);;	K06911|0.0|vvi:100241784|hypothetical protein LOC100241784	--	--	Pirin C-terminal cupin domain;; Pirin;; Cupin domain	Pirin-like protein At1g50590 GN=At1g50590 OS=Arabidopsis thaliana (Mouse-ear cress) PE=2 SV=1	Pirin-like protein [Glycine soja]
Glyma.02G296600	--	--	Molecular Function: metal ion binding (GO:0046872);;	--	[R]	General function prediction only	Ankyrin repeats (3 copies);; Ankyrin repeat;; Ankyrin repeats (many copies);; Ankyrin repeat;; Zinc finger C-x8-C-x5-C-x3-H type (and similar)	Zinc finger CCCH domain-containing protein 29 GN=At2g40140 OS=Arabidopsis thaliana (Mouse-ear cress) PE=2 SV=1	PREDICTED: zinc finger CCCH domain-containing protein 29-like [Glycine max]
Glyma.02G296700	--	--	Cellular Component: integral component of membrane (GO:0016021);;	--	[U]	Intracellular trafficking, secretion, and vesicular transport	Tim17/Tim22/Tim23/Pmp24 family	Mitochondrial import inner membrane translocase subunit TIM22-3 GN=TIM22-3 OS=Arabidopsis thaliana (Mouse-ear cress) PE=2 SV=1	PREDICTED: mitochondrial import inner membrane translocase subunit TIM22-3-like [Glycine max]
Glyma.02G296800	[Z]	Cytoskeleton	Molecular Function: microtubule motor activity (GO:0003777);; Molecular Function: ATP binding (GO:0005524);; Cellular Component: kinesin complex (GO:0005871);; Cellular Component: microtubule (GO:0005874);; Biological Process: DNA replication (GO:0006260);; Biological Process: chromatin silencing (GO:0006342);; Biological Process: microtubule-based movement (GO:0007018);; Molecular Function: micr…	--	--	--	Kinesin-related;; Kinesin motor domain	Kinesin-like protein KIN12B GN=MDB19.16 OS=Arabidopsis thaliana (Mouse-ear cress) PE=1 SV=1	PREDICTED: kinesin-like protein KIN12B-like isoform X2 [Glycine max]
Glyma.02G296900	--	--	--	--	--	--	C2 domain	Synaptotagmin-4 GN=T5K6.90 OS=Arabidopsis thaliana (Mouse-ear cress) PE=2 SV=1	PREDICTED: uncharacterized protein LOC100814102 isoform X1 [Glycine max]
Glyma.02G297000	[R]	General function prediction only	Molecular Function: nucleotide binding (GO:0000166);; Molecular Function: nucleic acid binding (GO:0003676);; Cellular Component: viral nucleocapsid (GO:0019013);; Cellular Component: intracellular ribonucleoprotein complex (GO:0030529);;	K14411|0.0|rcu:RCOM_0046640|Heterogeneous nuclear ribonucleoprotein 27C, putative	[A]	RNA processing and modification	RNA recognition motif. (a.k.a. RRM, RBD, or RNP domain);; RNA recognition motif (a.k.a. RRM, RBD, or RNP domain);; RNA recognition motif. (a.k.a. RRM, RBD, or RNP domain)	Heterogeneous nuclear ribonucleoprotein 1 GN=RNP1 OS=Arabidopsis thaliana (Mouse-ear cress) PE=1 SV=1	PREDICTED: heterogeneous nuclear ribonucleoprotein 1-like isoform X2 [Glycine max]
Glyma.02G297100	[RTKL]	--	Biological Process: activation of MAPKK activity (GO:0000186);; Molecular Function: MAP kinase kinase kinase activity (GO:0004709);; Molecular Function: transmembrane receptor protein tyrosine kinase activity (GO:0004714);; Molecular Function: ATP binding (GO:0005524);; Biological Process: peptidyl-tyrosine phosphorylation (GO:0018108);;	--	--	--	Protein kinase domain;; Protein tyrosine kinase;; Leucine Rich repeats (2 copies);; Leucine rich repeat;; Leucine Rich Repeat	Probable inactive receptor kinase At2g26730 (Precursor) GN=At2g26730 OS=Arabidopsis thaliana (Mouse-ear cress) PE=1 SV=1	PREDICTED: probable inactive receptor kinase At2g26730-like [Glycine max]
Glyma.02G297200	[RTKL]	--	Molecular Function: protein serine/threonine kinase activity (GO:0004674);; Molecular Function: ATP binding (GO:0005524);; Biological Process: protein phosphorylation (GO:0006468);; Biological Process: organ senescence (GO:0010260);;	--	[R]	General function prediction only	Protein kinase domain;; Protein tyrosine kinase	Probable serine/threonine-protein kinase WNK11 GN=WNK11 OS=Arabidopsis thaliana (Mouse-ear cress) PE=2 SV=1	PREDICTED: probable serine/threonine-protein kinase WNK11-like [Glycine max]
Glyma.02G297300	--	--	--	--	--	--	Frigida-like protein	FRIGIDA-like protein 1 GN=MQK4.4 OS=Arabidopsis thaliana (Mouse-ear cress) PE=1 SV=1	PREDICTED: FRIGIDA-like protein 1-like [Glycine max]
Glyma.02G297400	--	--	Molecular Function: transcription factor activity, sequence-specific DNA binding (GO:0003700);; Biological Process: regulation of transcription, DNA-templated (GO:0006355);; Molecular Function: sequence-specific DNA binding (GO:0043565);;	--	--	--	WRKY DNA -binding domain	Probable WRKY transcription factor 20 GN=WRKY20 OS=Arabidopsis thaliana (Mouse-ear cress) PE=2 SV=1	PREDICTED: probable WRKY transcription factor 20-like isoform X1 [Glycine max]
Glyma.02G297500	--	--	--	--	--	--	HR-like lesion-inducing	--	hypothetical protein glysoja_025910 [Glycine soja]
Glyma.02G297600	--	--	--	--	--	--	--	--	PREDICTED: uncharacterized protein LOC100779612 [Glycine max]
Glyma.02G297700	--	--	Biological Process: regulation of transcription, DNA-templated (GO:0006355);; Cellular Component: intracellular part (GO:0044424);;	--	--	--	GRAS domain family	Scarecrow-like protein 5 GN=SCL5 OS=Arabidopsis thaliana (Mouse-ear cress) PE=2 SV=1	PREDICTED: scarecrow-like protein 5-like [Glycine max]
Glyma.02G297800	--	--	--	--	--	--	A2L zinc ribbon domain	--	hypothetical protein glysoja_025913 [Glycine soja]
Glyma.02G297900	--	--	Molecular Function: double-stranded DNA binding (GO:0003690);; Cellular Component: mitochondrion (GO:0005739);; Biological Process: regulation of transcription, DNA-templated (GO:0006355);; Cellular Component: chloroplast (GO:0009507);; Biological Process: root development (GO:0048364);; Biological Process: shoot system development (GO:0048367);;	--	[KR]	--	mTERF	--	PREDICTED: uncharacterized protein LOC100809638 isoform X1 [Glycine max]
Glyma.02G298000	--	--	Molecular Function: nucleotide binding (GO:0000166);; Molecular Function: RNA binding (GO:0003723);; Molecular Function: metal ion binding (GO:0046872);;	--	--	--	OST-HTH/LOTUS domain;; RNA recognition motif (a.k.a. RRM, RBD, or RNP domain);; RNA recognition motif. (a.k.a. RRM, RBD, or RNP domain);; Zinc finger C-x8-C-x5-C-x3-H type (and similar)	Zinc finger CCCH domain-containing protein 18 GN=At2g05160 OS=Arabidopsis thaliana (Mouse-ear cress) PE=2 SV=1	Zinc finger CCCH domain-containing protein 18 [Glycine soja]
Glyma.02G298100	--	--	Biological Process: metal ion transport (GO:0030001);; Molecular Function: metal ion binding (GO:0046872);;	--	--	--	Heavy-metal-associated domain	--	PREDICTED: uncharacterized protein LOC102669549 [Glycine max]
Glyma.02G298200	[R]	General function prediction only	Molecular Function: DNA binding (GO:0003677);; Molecular Function: oxidoreductase activity, acting on CH-OH group of donors (GO:0016614);; Molecular Function: flavin adenine dinucleotide binding (GO:0050660);; Biological Process: oxidation-reduction process (GO:0055114);;	--	[S]	Function unknown	Domain of unknown function DUF21;; Transporter associated domain;; CBS domain	DUF21 domain-containing protein At1g55930, chloroplastic (Precursor) GN=CBSDUFCH2 OS=Arabidopsis thaliana (Mouse-ear cress) PE=2 SV=2	DUF21 domain-containing protein, chloroplastic [Glycine soja]
Glyma.02G298300	[V]	Defense mechanisms	Molecular Function: ATP binding (GO:0005524);; Biological Process: metabolic process (GO:0008152);; Cellular Component: integral component of membrane (GO:0016021);; Molecular Function: ATPase activity, coupled to transmembrane movement of substances (GO:0042626);; Biological Process: transmembrane transport (GO:0055085);;	--	[Q]	Secondary metabolites biosynthesis, transport and catabolism	ABC transporter transmembrane region;; ABC transporter	ABC transporter C family member 3 GN=MJG19.3 OS=Arabidopsis thaliana (Mouse-ear cress) PE=1 SV=1	PREDICTED: ABC transporter C family member 3-like [Glycine max]
Glyma.02G298400	[V]	Defense mechanisms	Molecular Function: ATP binding (GO:0005524);; Biological Process: metabolic process (GO:0008152);; Cellular Component: integral component of membrane (GO:0016021);; Molecular Function: ATPase activity, coupled to transmembrane movement of substances (GO:0042626);; Biological Process: transmembrane transport (GO:0055085);;	--	[Q]	Secondary metabolites biosynthesis, transport and catabolism	ABC transporter;; ABC transporter transmembrane region;; AAA domain;; P-loop containing region of AAA domain;; Miro-like protein;; 50S ribosome-binding GTPase;; FtsK/SpoIIIE family;; Type II/IV secretion system protein	ABC transporter C family member 3 GN=MJG19.3 OS=Arabidopsis thaliana (Mouse-ear cress) PE=1 SV=1	PREDICTED: ABC transporter C family member 3-like [Glycine max]
Glyma.02G298500	[V]	Defense mechanisms	Molecular Function: ATP binding (GO:0005524);; Biological Process: metabolic process (GO:0008152);; Cellular Component: integral component of membrane (GO:0016021);; Molecular Function: ATPase activity, coupled to transmembrane movement of substances (GO:0042626);; Biological Process: transmembrane transport (GO:0055085);;	--	[Q]	Secondary metabolites biosynthesis, transport and catabolism	ABC transporter;; ABC transporter transmembrane region;; AAA domain;; P-loop containing region of AAA domain;; Miro-like protein;; 50S ribosome-binding GTPase;; FtsK/SpoIIIE family;; Type II/IV secretion system protein	ABC transporter C family member 3 GN=MJG19.3 OS=Arabidopsis thaliana (Mouse-ear cress) PE=1 SV=1	PREDICTED: ABC transporter C family member 3-like [Glycine max]
Glyma.02G298600	[Q]	Secondary metabolites biosynthesis, transport and catabolism	Molecular Function: monooxygenase activity (GO:0004497);; Molecular Function: iron ion binding (GO:0005506);; Molecular Function: oxidoreductase activity, acting on paired donors, with incorporation or reduction of molecular oxygen (GO:0016705);; Molecular Function: heme binding (GO:0020037);; Biological Process: oxidation-reduction process (GO:0055114);;	--	[Q]	Secondary metabolites biosynthesis, transport and catabolism	Cytochrome P450	Cytochrome P450 71D10 GN=CYP71D10 OS=Glycine max (Soybean) PE=2 SV=1	PREDICTED: cytochrome P450 71D10-like [Glycine max]
Glyma.02G298700	[Q]	Secondary metabolites biosynthesis, transport and catabolism	Molecular Function: binding (GO:0005488);; Molecular Function: oxidoreductase activity (GO:0016491);; Biological Process: oxidation-reduction process (GO:0055114);;	--	[Q]	Secondary metabolites biosynthesis, transport and catabolism	Cytochrome P450	Cytochrome P450 71D10 GN=CYP71D10 OS=Glycine max (Soybean) PE=2 SV=1	Cytochrome P450 71D10 [Glycine soja]
Glyma.02G298800	[Q]	Secondary metabolites biosynthesis, transport and catabolism	Molecular Function: monooxygenase activity (GO:0004497);; Molecular Function: iron ion binding (GO:0005506);; Molecular Function: oxidoreductase activity, acting on paired donors, with incorporation or reduction of molecular oxygen (GO:0016705);; Molecular Function: heme binding (GO:0020037);; Biological Process: oxidation-reduction process (GO:0055114);;	--	[Q]	Secondary metabolites biosynthesis, transport and catabolism	Cytochrome P450	Cytochrome P450 71D10 GN=CYP71D10 OS=Glycine max (Soybean) PE=2 SV=1	PREDICTED: cytochrome P450 71D10-like [Glycine max]
Glyma.02G298900	--	--	--	--	[R]	General function prediction only	PPR repeat family;; PPR repeat;; PPR repeat;; Pentatricopeptide repeat domain;; Mitochondrial 28S ribosomal protein S27;; Tetratricopeptide repeat;; Tetratricopeptide repeat;; Region in Clathrin and VPS	Pentatricopeptide repeat-containing protein At3g06920 GN=At3g06920 OS=Arabidopsis thaliana (Mouse-ear cress) PE=2 SV=1	PREDICTED: pentatricopeptide repeat-containing protein At3g06920-like [Glycine max]
Glyma.02G299000	[O]	Posttranslational modification, protein turnover, chaperones	Molecular Function: threonine-type endopeptidase activity (GO:0004298);; Cellular Component: nucleus (GO:0005634);; Cellular Component: cytoplasm (GO:0005737);; Cellular Component: proteasome core complex (GO:0005839);; Biological Process: fatty acid beta-oxidation (GO:0006635);; Biological Process: toxin catabolic process (GO:0009407);; Biological Process: photorespiration (GO:0009853);; Biologi…	K02739|1e-122|pop:POPTR_817788|hypothetical protein	[O]	Posttranslational modification, protein turnover, chaperones	Proteasome subunit	Proteasome subunit beta type-7-B (Precursor) GN=MNF13.10 OS=Arabidopsis thaliana (Mouse-ear cress) PE=1 SV=2	PREDICTED: proteasome subunit beta type-7-B-like isoform X1 [Glycine max]
Glyma.02G299100	[E]	Amino acid transport and metabolism	Cellular Component: cytoplasm (GO:0005737);; Biological Process: cysteine biosynthetic process from serine (GO:0006535);; Molecular Function: serine O-acetyltransferase activity (GO:0009001);;	K00640|1e-158|rcu:RCOM_0520780|Serine acetyltransferase 3, mitochondrial precursor, putative (EC:2.3.1.30)	[E]	Amino acid transport and metabolism	Serine acetyltransferase, N-terminal;; Bacterial transferase hexapeptide (six repeats);; Hexapeptide repeat of succinyl-transferase	Serine acetyltransferase 3, mitochondrial (Precursor) GN=MJG19.6 OS=Arabidopsis thaliana (Mouse-ear cress) PE=1 SV=3	PREDICTED: serine acetyltransferase 3, mitochondrial-like [Glycine max]
Glyma.02G299200	--	--	Cellular Component: cell wall (GO:0005618);; Molecular Function: pectinesterase activity (GO:0030599);; Biological Process: cell wall modification (GO:0042545);; Molecular Function: aspartyl esterase activity (GO:0045330);; Biological Process: pectin catabolic process (GO:0045490);;	--	--	--	Pectinesterase	Pectinesterase QRT1 (Precursor) GN=MDF20.3 OS=Arabidopsis thaliana (Mouse-ear cress) PE=2 SV=1	PREDICTED: pectinesterase QRT1-like [Glycine max]
Glyma.02G299300	--	--	Cellular Component: extracellular region (GO:0005576);; Cellular Component: cell wall (GO:0005618);; Molecular Function: pectinesterase activity (GO:0030599);; Biological Process: cell wall modification (GO:0042545);; Molecular Function: aspartyl esterase activity (GO:0045330);; Biological Process: pectin catabolic process (GO:0045490);;	--	--	--	Pectinesterase	Pectinesterase QRT1 (Precursor) GN=MDF20.3 OS=Arabidopsis thaliana (Mouse-ear cress) PE=2 SV=1	PREDICTED: pectinesterase QRT1-like [Glycine max]
Glyma.02G299400	--	--	Molecular Function: phosphoprotein phosphatase activity (GO:0004721);; Cellular Component: mitochondrial inner membrane presequence translocase complex (GO:0005744);; Biological Process: protein targeting to mitochondrion (GO:0006626);; Biological Process: pyrimidine ribonucleotide biosynthetic process (GO:0009220);; Biological Process: photomorphogenesis (GO:0009640);; Biological Process: photor…	--	[K]	Transcription	NLI interacting factor-like phosphatase	Mitochondrial import inner membrane translocase subunit TIM50 (Precursor) GN=F14J16.15 OS=Arabidopsis thaliana (Mouse-ear cress) PE=1 SV=1	Mitochondrial import inner membrane translocase subunit TIM50 [Glycine soja]
Glyma.02G299500	--	--	--	--	--	--	--	Protein Ycf2 (Fragment) GN=ycf2 OS=Oenothera picensis (Evening primrose) PE=3 SV=1	PREDICTED: probable inactive protein kinase DDB_G0270444-like [Glycine max]
Glyma.02G299600	[L]	Replication, recombination and repair	Biological Process: meiotic DNA double-strand break processing (GO:0000706);; Biological Process: double-strand break repair via homologous recombination (GO:0000724);; Biological Process: DNA catabolic process, endonucleolytic (GO:0000737);; Molecular Function: DNA binding (GO:0003677);; Molecular Function: DNA topoisomerase type II (ATP-hydrolyzing) activity (GO:0003918);; Molecular Function: A…	K10878|1e-177|pop:POPTR_550198|hypothetical protein	[L]	Replication, recombination and repair	Type IIB DNA topoisomerase	Meiotic recombination protein SPO11-1 GN=SPO11-1 OS=Arabidopsis thaliana (Mouse-ear cress) PE=1 SV=1	PREDICTED: meiotic recombination protein SPO11-1-like isoform X1 [Glycine max]
Glyma.02G299700	[P]	Inorganic ion transport and metabolism	Biological Process: polysaccharide biosynthetic process (GO:0000271);; Molecular Function: potassium channel activity (GO:0005267);; Molecular Function: calcium ion binding (GO:0005509);; Cellular Component: vacuolar membrane (GO:0005774);; Biological Process: calcium ion transport (GO:0006816);; Biological Process: Golgi organization (GO:0007030);; Biological Process: response to salt stress (GO…	--	[P]	Inorganic ion transport and metabolism	Ion channel;; Ion transport protein	Two-pore potassium channel 1 GN=MDF20.7 OS=Arabidopsis thaliana (Mouse-ear cress) PE=1 SV=2	PREDICTED: two-pore potassium channel 1-like [Glycine max]
Glyma.02G299800	--	--	--	--	--	--	--	--	hypothetical protein glysoja_025932 [Glycine soja]
Glyma.02G299900	[E]	Amino acid transport and metabolism	Molecular Function: cysteine synthase activity (GO:0004124);; Biological Process: cysteine biosynthetic process from serine (GO:0006535);; Molecular Function: transferase activity (GO:0016740);; Biological Process: photoperiodism, flowering (GO:0048573);;	K01738|1e-177|pop:POPTR_707666|phosphateglycerate kinase (EC:2.5.1.47)	[E]	Amino acid transport and metabolism	Pyridoxal-phosphate dependent enzyme	Bifunctional cystathionine gamma-lyase/cysteine synthase GN=DES1 OS=Arabidopsis thaliana (Mouse-ear cress) PE=1 SV=1	PREDICTED: cysteine synthase 2-like [Glycine max]
Glyma.02G300000	--	--	--	--	--	--	--	--	hypothetical protein glysoja_025933 [Glycine soja]
Glyma.02G300100	--	--	--	--	--	--	--	--	PREDICTED: uncharacterized protein LOC100814985 [Glycine max]
Glyma.02G300200	[B]	Chromatin structure and dynamics	Cellular Component: nucleus (GO:0005634);; Biological Process: regulation of transcription, DNA-templated (GO:0006355);; Molecular Function: sequence-specific DNA binding (GO:0043565);; Molecular Function: protein heterodimerization activity (GO:0046982);;	--	[K]	Transcription	Histone-like transcription factor (CBF/NF-Y) and archaeal histone;; Core histone H2A/H2B/H3/H4	Nuclear transcription factor Y subunit B-2 GN=MNJ7.23 OS=Arabidopsis thaliana (Mouse-ear cress) PE=2 SV=1	Nuclear transcription factor Y subunit B-3 [Glycine soja]
Glyma.02G300300	--	--	Cellular Component: chloroplast thylakoid membrane (GO:0009535);; Cellular Component: chloroplast inner membrane (GO:0009706);; Biological Process: protein transport (GO:0015031);; Cellular Component: integral component of membrane (GO:0016021);;	--	--	--	--	Protein TIC 20-v, chloroplastic (Precursor) GN=TIC20-V OS=Arabidopsis thaliana (Mouse-ear cress) PE=2 SV=1	PREDICTED: protein TIC 20-v, chloroplastic-like isoform 1 [Glycine max]
Glyma.02G300400	[S]	Function unknown	--	--	--	--	--	Formin-like protein 20 GN=MBK20.20/MBK20.21 OS=Arabidopsis thaliana (Mouse-ear cress) PE=2 SV=3	PREDICTED: leucine-rich repeat extensin-like protein 3-like [Glycine max]
Glyma.02G300500	[F]	Nucleotide transport and metabolism	Biological Process: metabolic process (GO:0008152);; Molecular Function: hydrolase activity (GO:0016787);;	--	[T]	Signal transduction mechanisms	NUDIX domain	Nudix hydrolase 10 GN=T30C3.4 OS=Arabidopsis thaliana (Mouse-ear cress) PE=1 SV=1	PREDICTED: nudix hydrolase 10-like [Glycine max]
Glyma.02G300600	--	--	Molecular Function: nicotinamide-nucleotide adenylyltransferase activity (GO:0000309);; Biological Process: NAD biosynthetic process (GO:0009435);;	K06210|4e-50|rcu:RCOM_0521840|nicotinamide mononucleotide adenylyltransferase, putative (EC:2.7.7.1)	[H]	Coenzyme transport and metabolism	Cytidylyltransferase	Nicotinamide/nicotinic acid mononucleotide adenylyltransferase {ECO:0000305} GN=NMNAT OS=Arabidopsis thaliana (Mouse-ear cress) PE=2 SV=1	hypothetical protein PHAVU_008G279200g [Phaseolus vulgaris]
Glyma.02G300700	--	--	Biological Process: NAD biosynthetic process (GO:0009435);; Molecular Function: nucleotidyltransferase activity (GO:0016779);;	K06210|2e-29|vvi:100251521|similar to ATNMNAT (A. THALIANA NICOTINATE/NICOTINAMIDE MONONUCLEOTIDE ADENYLTRANSFERASE)	[H]	Coenzyme transport and metabolism	Cytidylyltransferase	Nicotinamide/nicotinic acid mononucleotide adenylyltransferase {ECO:0000305} GN=NMNAT OS=Arabidopsis thaliana (Mouse-ear cress) PE=2 SV=1	PREDICTED: nicotinamide mononucleotide adenylyltransferase-like isoform X1 [Glycine max]
Glyma.02G300800	--	--	Biological Process: MAPK cascade (GO:0000165);; Biological Process: microtubule cytoskeleton organization (GO:0000226);; Biological Process: cytokinesis by cell plate formation (GO:0000911);; Molecular Function: protein serine/threonine kinase activity (GO:0004674);; Molecular Function: transmembrane receptor protein tyrosine kinase activity (GO:0004714);; Molecular Function: ATP binding (GO:0005…	--	--	--	--	Probable L-type lectin-domain containing receptor kinase S.7 (Precursor) GN=LECRKS7 OS=Arabidopsis thaliana (Mouse-ear cress) PE=2 SV=1	PREDICTED: probable L-type lectin-domain containing receptor kinase S.7-like [Glycine max]
Glyma.02G300900	--	--	--	--	[D]	Cell cycle control, cell division, chromosome partitioning	Protein of unknown function (DUF2775)	Organ-specific protein S2 OS=Pisum sativum (Garden pea) PE=2 SV=1	hypothetical protein glysoja_025938, partial [Glycine soja]
Glyma.02G301000	[J]	Translation, ribosomal structure and biogenesis	Molecular Function: RNA binding (GO:0003723);; Biological Process: regulation of transcription, DNA-templated (GO:0006355);; Biological Process: tRNA metabolic process (GO:0006399);; Molecular Function: rRNA methyltransferase activity (GO:0008649);; Biological Process: chloroplast organization (GO:0009658);; Biological Process: rRNA methylation (GO:0031167);; Biological Process: protein targeting…	K03500|0.0|pop:POPTR_798161|hypothetical protein	[A]	RNA processing and modification	NOL1/NOP2/sun family;; NusB family;; Methyltransferase domain;; Methyltransferase domain;; Methyltransferase domain;; FtsJ-like methyltransferase;; Met-10+ like-protein;; RNA cap guanine-N2 methyltransferase	--	PREDICTED: putative ribosomal RNA methyltransferase NOP2-like [Glycine max]
Glyma.02G301100	--	--	Cellular Component: plasma membrane (GO:0005886);; Biological Process: Golgi vesicle transport (GO:0048193);;	--	--	--	Cleavage site for pathogenic type III effector avirulence factor Avr	RPM1-interacting protein 4 GN=RIN4 OS=Arabidopsis thaliana (Mouse-ear cress) PE=1 SV=1	PREDICTED: RPM1-interacting protein 4-like [Glycine max]
Glyma.02G301200	[M]	Cell wall/membrane/envelope biogenesis	Cellular Component: integral component of membrane (GO:0016021);; Molecular Function: cellulose synthase (UDP-forming) activity (GO:0016760);; Biological Process: cellulose biosynthetic process (GO:0030244);;	--	--	--	Cellulose synthase	Cellulose synthase-like protein E6 GN=P0556A05.32 OS=Oryza sativa subsp. japonica (Rice) PE=2 SV=1	Cellulose synthase-like protein E6 [Glycine soja]
Glyma.02G301300	--	--	Cellular Component: integral component of membrane (GO:0016021);; Molecular Function: cellulose synthase (UDP-forming) activity (GO:0016760);; Biological Process: cellulose biosynthetic process (GO:0030244);;	--	--	--	--	Cellulose synthase-like protein E2 GN=CSLE2 OS=Oryza sativa subsp. japonica (Rice) PE=2 SV=1	Cellulose synthase-like protein E6 [Glycine soja]
Glyma.02G301400	[L]	Replication, recombination and repair	--	--	--	--	Weak chloroplast movement under blue light	WEB family protein At5g55860 GN=At5g55860 OS=Arabidopsis thaliana (Mouse-ear cress) PE=1 SV=1	WEB family protein [Glycine soja]
Glyma.02G301500	--	--	Cellular Component: nucleus (GO:0005634);; Cellular Component: cytosol (GO:0005829);; Biological Process: metabolic process (GO:0008152);; Biological Process: vernalization response (GO:0010048);; Molecular Function: hydrolase activity (GO:0016787);;	--	--	--	Sucrase/ferredoxin-like	Proline-rich receptor-like protein kinase PERK1 GN=PERK1 OS=Arabidopsis thaliana (Mouse-ear cress) PE=2 SV=1	PREDICTED: uncharacterized protein LOC100780395 [Glycine max]
Glyma.02G301600	--	--	--	--	[I]	Lipid transport and metabolism	CRAL/TRIO domain	Phosphatidylinositol/phosphatidylcholine transfer protein SFH2 GN=SFH2 OS=Arabidopsis thaliana (Mouse-ear cress) PE=2 SV=1	PREDICTED: phosphatidylinositol/phosphatidylcholine transfer protein SFH1-like isoform X2 [Glycine max]
Glyma.02G301700	--	--	Biological Process: maltose metabolic process (GO:0000023);; Cellular Component: mitochondrion (GO:0005739);; Cellular Component: cytosol (GO:0005829);; Biological Process: pentose-phosphate shunt (GO:0006098);; Biological Process: rRNA processing (GO:0006364);; Cellular Component: chloroplast stroma (GO:0009570);; Biological Process: defense response, incompatible interaction (GO:0009814);; Cell…	K13545|1e-132|vvi:100252439|hypothetical protein LOC100252439	--	--	Red chlorophyll catabolite reductase (RCC reductase)	Red chlorophyll catabolite reductase, chloroplastic (Precursor) GN=C7A10_360 OS=Arabidopsis thaliana (Mouse-ear cress) PE=1 SV=2	uncharacterized protein LOC100780934 [Glycine max]
Glyma.02G301800	--	--	Biological Process: transmembrane transport (GO:0055085);;	--	[T]	Signal transduction mechanisms	OPT oligopeptide transporter protein	Oligopeptide transporter 1 GN=OPT1 OS=Arabidopsis thaliana (Mouse-ear cress) PE=2 SV=1	PREDICTED: oligopeptide transporter 1-like [Glycine max]
Glyma.02G301900	--	--	--	--	[R]	General function prediction only	Uncharacterised protein family (UPF0172)	ER membrane protein complex subunit 8/9 homolog GN=EMB2731 OS=Arabidopsis thaliana (Mouse-ear cress) PE=2 SV=1	uncharacterized protein LOC100527135 [Glycine max]
Glyma.02G302000	--	--	--	--	--	--	Protein of unknown function (DUF1296)	--	PREDICTED: mucin-19-like isoform X3 [Glycine max]
Glyma.02G302100	[GER]	--	Biological Process: carbohydrate transport (GO:0008643);; Cellular Component: integral component of membrane (GO:0016021);; Biological Process: transmembrane transport (GO:0055085);;	--	[GE]	--	Triose-phosphate Transporter family;; UAA transporter family;; EamA-like transporter family	Uncharacterized membrane protein At1g06890 GN=At1g06890 OS=Arabidopsis thaliana (Mouse-ear cress) PE=1 SV=1	PREDICTED: uncharacterized membrane protein At1g06890-like [Glycine max]
Glyma.02G302200	[V]	Defense mechanisms	Molecular Function: ATP binding (GO:0005524);; Cellular Component: plasma membrane (GO:0005886);; Biological Process: metabolic process (GO:0008152);; Biological Process: pollen maturation (GO:0010152);; Biological Process: pollen exine formation (GO:0010584);; Molecular Function: molybdate transmembrane-transporting ATPase activity (GO:0015412);; Biological Process: molybdate ion transport (GO:0…	--	[Q]	Secondary metabolites biosynthesis, transport and catabolism	ABC-2 type transporter;; ABC transporter;; AAA domain	ABC transporter G family member 26 GN=MJG19.19 OS=Arabidopsis thaliana (Mouse-ear cress) PE=3 SV=2	ABC transporter G family member 26 [Glycine soja]
Glyma.02G302300	[R]	General function prediction only	Cellular Component: integral component of membrane (GO:0016021);;	--	[S]	Function unknown	Domain of unknown function DUF20	--	PREDICTED: uncharacterized protein LOC100820134 [Glycine max]
Glyma.02G302400	--	--	Biological Process: metabolic process (GO:0008152);; Molecular Function: zinc ion binding (GO:0008270);; Molecular Function: hydrolase activity (GO:0016787);; Molecular Function: ligase activity (GO:0016874);;	--	[O]	Posttranslational modification, protein turnover, chaperones	--	E3 ubiquitin-protein ligase At4g11680 GN=At4g11680 OS=Arabidopsis thaliana (Mouse-ear cress) PE=2 SV=1	PREDICTED: E3 ubiquitin-protein ligase At1g12760-like [Glycine max]
Glyma.02G302500	[O]	Posttranslational modification, protein turnover, chaperones	Molecular Function: ATP binding (GO:0005524);; Biological Process: protein folding (GO:0006457);; Biological Process: response to stress (GO:0006950);; Molecular Function: unfolded protein binding (GO:0051082);;	K04079|0.0|rcu:RCOM_0104810|heat shock protein, putative	[O]	Posttranslational modification, protein turnover, chaperones	Hsp90 protein;; Histidine kinase-, DNA gyrase B-, and HSP90-like ATPase;; Histidine kinase-, DNA gyrase B-, and HSP90-like ATPase	Heat shock cognate protein 80 GN=HSC80 OS=Solanum lycopersicum (Tomato) PE=2 SV=1	heat shock protein 90-2 [Glycine max]
Glyma.02G302600	[S]	Function unknown	Molecular Function: protein serine/threonine kinase activity (GO:0004674);; Molecular Function: ATP binding (GO:0005524);; Biological Process: protein phosphorylation (GO:0006468);; Cellular Component: integral component of membrane (GO:0016021);;	--	--	--	Leucine Rich repeats (2 copies);; Leucine rich repeat;; Protein kinase domain;; Protein tyrosine kinase;; Leucine Rich Repeat;; Leucine rich repeat N-terminal domain;; Leucine Rich repeat;; Leucine rich repeat	Probable LRR receptor-like serine/threonine-protein kinase At4g26540 (Precursor) GN=At4g26540 OS=Arabidopsis thaliana (Mouse-ear cress) PE=2 SV=1	PREDICTED: probable LRR receptor-like serine/threonine-protein kinase At4g26540-like [Glycine max]
Glyma.02G302700	--	--	Biological Process: regulation of DNA repair (GO:0006282);;	--	--	--	RecX family	--	PREDICTED: uncharacterized protein LOC100783629 isoform X2 [Glycine max]
Glyma.02G302800	--	--	Molecular Function: microtubule motor activity (GO:0003777);; Molecular Function: ATP binding (GO:0005524);; Cellular Component: mitochondrion (GO:0005739);; Cellular Component: kinesin complex (GO:0005871);; Cellular Component: microtubule (GO:0005874);; Biological Process: microtubule-based movement (GO:0007018);; Molecular Function: microtubule binding (GO:0008017);; Biological Process: aerobi…	--	[Z]	Cytoskeleton	Kinesin motor domain;; Plant protein of unknown function (DUF868);; Calponin homology (CH) domain	Kinesin KP1 GN=KP1 OS=Arabidopsis thaliana (Mouse-ear cress) PE=1 SV=2	Kinesin-4 [Glycine soja]
Glyma.02G302900	[F]	Nucleotide transport and metabolism	Molecular Function: uracil phosphoribosyltransferase activity (GO:0004845);; Molecular Function: uridine kinase activity (GO:0004849);; Molecular Function: ATP binding (GO:0005524);; Biological Process: phosphorylation (GO:0016310);; Biological Process: UMP salvage (GO:0044206);; Biological Process: CTP salvage (GO:0044211);;	K00876|0.0|rcu:RCOM_1538500|uridine cytidine kinase I, putative (EC:2.4.2.9 2.7.1.48)	[TZ]	--	Uracil phosphoribosyltransferase;; Phosphoribulokinase / Uridine kinase family;; AAA domain;; Dephospho-CoA kinase	Putative uracil phosphoribosyltransferase GN=M3E9.60 OS=Arabidopsis thaliana (Mouse-ear cress) PE=2 SV=2	PREDICTED: uridine kinase-like protein 4-like [Glycine max]
Glyma.02G303000	[G]	Carbohydrate transport and metabolism	Molecular Function: fructose-bisphosphate aldolase activity (GO:0004332);; Molecular Function: uracil phosphoribosyltransferase activity (GO:0004845);; Molecular Function: uridine kinase activity (GO:0004849);; Cellular Component: cytoplasm (GO:0005737);; Biological Process: glycolytic process (GO:0006096);; Biological Process: UMP biosynthetic process (GO:0006222);; Biological Process: phosphory…	K01623|0.0|pop:POPTR_708143|fructose-bisphosphate aldolase (EC:4.1.2.13)	[G]	Carbohydrate transport and metabolism	Fructose-bisphosphate aldolase class-I	Fructose-bisphosphate aldolase, cytoplasmic isozyme 1 OS=Pisum sativum (Garden pea) PE=2 SV=1	PREDICTED: fructose-bisphosphate aldolase, cytoplasmic isozyme 1-like [Glycine max]
Glyma.02G303100	--	--	--	--	--	--	Late embryogenesis abundant protein	Uncharacterized protein At1g08160 GN=At1g08160 OS=Arabidopsis thaliana (Mouse-ear cress) PE=2 SV=1	PREDICTED: protein YLS9-like [Glycine max]
Glyma.02G303200	--	--	Cellular Component: integral component of membrane (GO:0016021);;	--	--	--	--	--	PREDICTED: uncharacterized protein LOC102665099 [Glycine max]
Glyma.02G303300	--	--	Biological Process: carbohydrate metabolic process (GO:0005975);; Molecular Function: galactinol-raffinose galactosyltransferase activity (GO:0047268);; Molecular Function: galactinol-sucrose galactosyltransferase activity (GO:0047274);;	--	--	--	Raffinose synthase or seed imbibition protein Sip1	Probable galactinol--sucrose galactosyltransferase 1 OS=Arabidopsis thaliana (Mouse-ear cress) PE=2 SV=1	PREDICTED: probable galactinol--sucrose galactosyltransferase 1-like [Glycine max]
Glyma.02G303400	[O]	Posttranslational modification, protein turnover, chaperones	Cellular Component: mitochondrial inner membrane (GO:0005743);; Biological Process: heme a biosynthetic process (GO:0006784);; Cellular Component: integral component of membrane (GO:0016021);; Biological Process: sterol biosynthetic process (GO:0016126);; Molecular Function: oxidoreductase activity, acting on the CH-CH group of donors (GO:0016627);; Biological Process: pentacyclic triterpenoid bi…	K02259|0.0|vvi:100251414|hypothetical protein LOC100251414	[O]	Posttranslational modification, protein turnover, chaperones	Cytochrome oxidase assembly protein	Cytochrome c oxidase assembly protein COX15 GN=COX15 OS=Arabidopsis thaliana (Mouse-ear cress) PE=2 SV=1	PREDICTED: cytochrome c oxidase assembly protein COX15-like [Glycine max]
Glyma.02G303500	--	--	Cellular Component: integral component of membrane (GO:0016021);;	--	[E]	Amino acid transport and metabolism	Transmembrane amino acid transporter protein;; Tryptophan/tyrosine permease family	Probable amino acid permease 7 GN=AAP7 OS=Arabidopsis thaliana (Mouse-ear cress) PE=2 SV=1	PREDICTED: probable amino acid permease 7-like isoform X3 [Glycine max]
Glyma.02G303600	--	--	Molecular Function: nucleotide binding (GO:0000166);; Molecular Function: RNA binding (GO:0003723);; Molecular Function: metal ion binding (GO:0046872);;	K12872|0.0|vvi:100241603|hypothetical protein LOC100241603	[R]	General function prediction only	RNA recognition motif. (a.k.a. RRM, RBD, or RNP domain);; RNA recognition motif (a.k.a. RRM, RBD, or RNP domain);; RNA recognition motif. (a.k.a. RRM, RBD, or RNP domain)	Zinc finger CCCH domain-containing protein 4 GN=At1g07360 OS=Arabidopsis thaliana (Mouse-ear cress) PE=2 SV=1	PREDICTED: zinc finger CCCH domain-containing protein 4-like isoform X1 [Glycine max]
Glyma.02G303700	--	--	Cellular Component: plasma membrane (GO:0005886);; Biological Process: amino acid transport (GO:0006865);; Molecular Function: symporter activity (GO:0015293);; Cellular Component: integral component of membrane (GO:0016021);; Biological Process: transmembrane transport (GO:0055085);;	--	[E]	Amino acid transport and metabolism	Transmembrane amino acid transporter protein;; Tryptophan/tyrosine permease family	Probable amino acid permease 7 GN=AAP7 OS=Arabidopsis thaliana (Mouse-ear cress) PE=2 SV=1	PREDICTED: probable amino acid permease 7-like [Glycine max]
Glyma.02G303800	--	--	Molecular Function: DNA binding (GO:0003677);; Molecular Function: transcription factor activity, sequence-specific DNA binding (GO:0003700);; Biological Process: regulation of transcription, DNA-templated (GO:0006355);; Cellular Component: CCAAT-binding factor complex (GO:0016602);;	--	[K]	Transcription	CCAAT-binding transcription factor (CBF-B/NF-YA) subunit B	Nuclear transcription factor Y subunit A-9 GN=NFYA9 OS=Arabidopsis thaliana (Mouse-ear cress) PE=2 SV=1	PREDICTED: nuclear transcription factor Y subunit A-9-like isoform X5 [Glycine max]
Glyma.02G303900	--	--	--	--	--	--	--	--	PREDICTED: uncharacterized protein LOC102664626 [Glycine max]
Glyma.02G304000	[S]	Function unknown	--	--	[R]	General function prediction only	Armadillo/beta-catenin-like repeat;; HEAT repeats;; HEAT repeat;; HEAT-like repeat;; Vacuolar 14 Fab1-binding region	Proline-rich receptor-like protein kinase PERK10 GN=PERK10 OS=Arabidopsis thaliana (Mouse-ear cress) PE=2 SV=2	PREDICTED: armadillo repeat-containing protein 8-like isoform X1 [Glycine max]
Glyma.02G304100	--	--	Biological Process: metabolic process (GO:0008152);; Molecular Function: ceramidase activity (GO:0017040);;	K12349|0.0|rcu:RCOM_0731110|ceramidase, putative	[T]	Signal transduction mechanisms	Neutral/alkaline non-lysosomal ceramidase	Neutral ceramidase (Precursor) OS=Oryza sativa subsp. japonica (Rice) PE=1 SV=1	PREDICTED: neutral ceramidase-like [Glycine max]
Glyma.02G304200	[G]	Carbohydrate transport and metabolism	Cellular Component: phosphopyruvate hydratase complex (GO:0000015);; Molecular Function: magnesium ion binding (GO:0000287);; Molecular Function: phosphopyruvate hydratase activity (GO:0004634);; Cellular Component: nucleus (GO:0005634);; Biological Process: glycolytic process (GO:0006096);;	K01689|0.0|vvi:100265663|similar to enolase, putative	[G]	Carbohydrate transport and metabolism	Enolase, C-terminal TIM barrel domain;; Enolase, N-terminal domain	Cytosolic enolase 3 GN=F16P2.6 OS=Arabidopsis thaliana (Mouse-ear cress) PE=1 SV=1	Cytosolic enolase 3 [Glycine soja]
Glyma.02G304300	[L]	Replication, recombination and repair	Molecular Function: DNA binding (GO:0003677);; Cellular Component: nucleus (GO:0005634);; Biological Process: regulation of DNA replication (GO:0006275);; Molecular Function: DNA polymerase processivity factor activity (GO:0030337);;	K04802|2e-47|vvi:100248466|hypothetical protein LOC100248466	[L]	Replication, recombination and repair	Proliferating cell nuclear antigen, N-terminal domain;; Proliferating cell nuclear antigen, C-terminal domain	Proliferating cell nuclear antigen GN=PCNA OS=Nicotiana tabacum (Common tobacco) PE=2 SV=1	PREDICTED: proliferating cell nuclear antigen-like [Glycine max]
Glyma.02G304400	--	--	Biological Process: single-organism process (GO:0044699);;	--	--	--	Plant protein of unknown function (DUF641)	--	PREDICTED: uncharacterized protein LOC100780566 [Glycine max]
Glyma.02G304500	[G]	Carbohydrate transport and metabolism	Biological Process: maltose metabolic process (GO:0000023);; Molecular Function: ATP binding (GO:0005524);; Biological Process: glycogen biosynthetic process (GO:0005978);; Biological Process: pentose-phosphate shunt (GO:0006098);; Molecular Function: glucose-1-phosphate adenylyltransferase activity (GO:0008878);; Cellular Component: chloroplast stroma (GO:0009570);; Biological Process: response …	K00975|0.0|pop:POPTR_573143|glucose-1-phosphate adenylyltransferase (EC:2.7.7.27)	[M]	Cell wall/membrane/envelope biogenesis	Nucleotidyl transferase	Glucose-1-phosphate adenylyltransferase small subunit 2, chloroplastic (Precursor) GN=AGPP OS=Vicia faba (Broad bean) PE=2 SV=1	PREDICTED: glucose-1-phosphate adenylyltransferase small subunit 2, chloroplastic-like isoform 1 [Glycine max]
Glyma.02G304600	--	--	Molecular Function: transcription factor activity, sequence-specific DNA binding (GO:0003700);; Cellular Component: nucleus (GO:0005634);; Biological Process: regulation of transcription, DNA-templated (GO:0006355);; Biological Process: megasporogenesis (GO:0009554);; Biological Process: flower development (GO:0009908);; Biological Process: cell differentiation (GO:0030154);;	--	--	--	--	Transcriptional regulator STERILE APETALA GN=SAP OS=Arabidopsis thaliana (Mouse-ear cress) PE=1 SV=1	PREDICTED: transcriptional regulator STERILE APETALA-like [Glycine max]
Glyma.02G304700	--	--	Biological Process: metabolic process (GO:0008152);; Biological Process: cellular process (GO:0009987);; Molecular Function: oxidoreductase activity, acting on the CH-CH group of donors, iron-sulfur protein as acceptor (GO:0016636);; Biological Process: single-organism process (GO:0044699);;	K08101|2e-90|vvi:100267105|hypothetical protein LOC100267105	--	--	Ferredoxin-dependent bilin reductase	Phytochromobilin:ferredoxin oxidoreductase, chloroplastic (Precursor) GN=HY2 OS=Arabidopsis thaliana (Mouse-ear cress) PE=2 SV=1	PREDICTED: phytochromobilin:ferredoxin oxidoreductase, chloroplastic-like isoform X4 [Glycine max]
Glyma.02G304900	[J]	Translation, ribosomal structure and biogenesis	Cellular Component: nucleus (GO:0005634);; Biological Process: regulation of gibberellic acid mediated signaling pathway (GO:0009937);; Biological Process: protein ubiquitination (GO:0016567);; Cellular Component: SCF ubiquitin ligase complex (GO:0019005);; Biological Process: regulation of shoot system development (GO:0048831);;	--	--	--	F-box-like;; F-box domain	F-box protein SNE GN=MIF21.6 OS=Arabidopsis thaliana (Mouse-ear cress) PE=1 SV=1	PREDICTED: F-box protein SNE-like [Glycine max]
Glyma.02G305000	[O]	Posttranslational modification, protein turnover, chaperones	--	--	--	--	Domain of unknown function (DUF3444);; DnaJ domain	Chaperone protein dnaJ 49 OS=Arabidopsis thaliana (Mouse-ear cress) PE=2 SV=2	PREDICTED: uncharacterized protein LOC100792639 isoform X1 [Glycine max]
Glyma.02G305100	--	--	Molecular Function: kinase activity (GO:0016301);; Biological Process: phosphorylation (GO:0016310);;	--	--	--	SAM domain (Sterile alpha motif);; SAM domain (Sterile alpha motif)	--	uncharacterized protein LOC100499990 [Glycine max]
Glyma.02G305200	--	--	Cellular Component: chloroplast (GO:0009507);; Biological Process: embryo sac egg cell differentiation (GO:0009560);;	K14300|0.0|vvi:100249432|hypothetical protein LOC100249432	--	--	Non-repetitive/WGA-negative nucleoporin C-terminal;; Nup133 N terminal like	Nuclear pore complex protein NUP133 {ECO:0000303|PubMed:21189294} OS=Arabidopsis thaliana (Mouse-ear cress) PE=1 SV=1	PREDICTED: uncharacterized protein LOC100793167 [Glycine max]
Glyma.02G305300	[P]	Inorganic ion transport and metabolism	Molecular Function: nucleotide binding (GO:0000166);; Molecular Function: calcium-transporting ATPase activity (GO:0005388);; Biological Process: metabolic process (GO:0008152);; Cellular Component: integral component of membrane (GO:0016021);; Molecular Function: metal ion binding (GO:0046872);; Biological Process: calcium ion transmembrane transport (GO:0070588);;	--	[P]	Inorganic ion transport and metabolism	--	Calcium-transporting ATPase 12, plasma membrane-type GN=ACA12 OS=Arabidopsis thaliana (Mouse-ear cress) PE=2 SV=1	Calcium-transporting ATPase 12, plasma membrane-type [Glycine soja]
Glyma.02G305400	--	--	Cellular Component: photosystem I (GO:0009522);; Cellular Component: photosystem II (GO:0009523);; Cellular Component: chloroplast thylakoid membrane (GO:0009535);; Biological Process: photosynthesis, light harvesting (GO:0009765);; Cellular Component: integral component of membrane (GO:0016021);; Molecular Function: chlorophyll binding (GO:0016168);; Biological Process: protein-chromophore linka…	K08913|0.0|pop:POPTR_664872|Lhcb2-1	--	--	Chlorophyll A-B binding protein	Chlorophyll a-b binding protein 215, chloroplastic (Precursor) GN=CAB215 OS=Pisum sativum (Garden pea) PE=1 SV=1	uncharacterized protein LOC100793702 [Glycine max]
Glyma.02G305500	--	--	--	--	--	--	--	--	PREDICTED: uncharacterized protein LOC102666892 [Glycine max]
Glyma.02G305600	[O]	Posttranslational modification, protein turnover, chaperones	Molecular Function: ATP binding (GO:0005524);; Biological Process: protein folding (GO:0006457);; Biological Process: response to stress (GO:0006950);; Molecular Function: unfolded protein binding (GO:0051082);;	--	[O]	Posttranslational modification, protein turnover, chaperones	Hsp90 protein;; Histidine kinase-, DNA gyrase B-, and HSP90-like ATPase;; Histidine kinase-, DNA gyrase B-, and HSP90-like ATPase	Heat shock protein 83 GN=HSP83A OS=Ipomoea nil (Japanese morning glory) PE=2 SV=1	PREDICTED: heat shock protein 83-like [Glycine max]
Glyma.02G305700	--	--	Molecular Function: zinc ion binding (GO:0008270);;	--	--	--	Protein of unknown function (DUF1423)	OBERON-like protein (Fragment) GN=PVIP OS=Pisum sativum (Garden pea) PE=1 SV=1	PREDICTED: OBERON-like protein-like [Glycine max]
Glyma.02G305800	--	--	--	--	--	--	--	--	PREDICTED: uncharacterized protein LOC102660889 [Glycine max]
Glyma.02G305900	[T]	Signal transduction mechanisms	Molecular Function: phosphorelay sensor kinase activity (GO:0000155);; Molecular Function: phosphorelay response regulator activity (GO:0000156);; Biological Process: phosphorelay signal transduction system (GO:0000160);; Molecular Function: osmosensor activity (GO:0005034);; Molecular Function: ATP binding (GO:0005524);; Cellular Component: plasma membrane (GO:0005886);; Biological Process: regu…	K14489|0.0|vvi:100263145|hypothetical protein LOC100263145	[T]	Signal transduction mechanisms	CHASE domain;; Histidine kinase-, DNA gyrase B-, and HSP90-like ATPase;; Response regulator receiver domain;; His Kinase A (phospho-acceptor) domain	Histidine kinase 2 GN=AHK2 OS=Arabidopsis thaliana (Mouse-ear cress) PE=1 SV=1	Histidine kinase 2, partial [Glycine soja]
Glyma.02G306000	--	--	Molecular Function: protein histidine kinase activity (GO:0004673);; Molecular Function: hydrolase activity (GO:0016787);; Biological Process: peptidyl-histidine phosphorylation (GO:0018106);;	--	--	--	X8 domain	Glucan endo-1,3-beta-glucosidase 12 (Precursor) GN=At4g29360 OS=Arabidopsis thaliana (Mouse-ear cress) PE=1 SV=1	PREDICTED: glucan endo-1,3-beta-glucosidase 12-like [Glycine max]
Glyma.02G306100	--	--	Cellular Component: exocyst (GO:0000145);; Biological Process: exocytosis (GO:0006887);;	--	--	--	--	--	PREDICTED: exocyst complex component EXO70B1-like [Glycine max]
Glyma.02G306200	--	--	Biological Process: regulation of transcription, DNA-templated (GO:0006355);;	--	--	--	GRAS domain family	Scarecrow-like transcription factor PAT1 GN=PAT1 OS=Arabidopsis thaliana (Mouse-ear cress) PE=2 SV=1	PREDICTED: scarecrow-like transcription factor PAT1-like isoformX1 [Glycine max]
Glyma.02G306300	--	--	Molecular Function: transcription factor activity, sequence-specific DNA binding (GO:0003700);; Biological Process: regulation of transcription, DNA-templated (GO:0006355);; Molecular Function: sequence-specific DNA binding (GO:0043565);;	--	--	--	WRKY DNA -binding domain	WRKY transcription factor 1 OS=Arabidopsis thaliana (Mouse-ear cress) PE=1 SV=1	PREDICTED: WRKY transcription factor 1-like [Glycine max]
Glyma.02G306400	--	--	Biological Process: D-xylose metabolic process (GO:0042732);;	K13118|0.0|rcu:RCOM_1120390|protein with unknown function	[R]	General function prediction only	Nuclear protein Es2	--	PREDICTED: protein DGCR14 homolog [Glycine max]
Glyma.02G306500	[RTKL]	--	Molecular Function: protein serine/threonine kinase activity (GO:0004674);; Molecular Function: ATP binding (GO:0005524);; Biological Process: protein phosphorylation (GO:0006468);; Biological Process: organ senescence (GO:0010260);;	--	[R]	General function prediction only	Protein kinase domain;; Protein tyrosine kinase	Probable serine/threonine-protein kinase WNK11 GN=WNK11 OS=Arabidopsis thaliana (Mouse-ear cress) PE=2 SV=1	PREDICTED: probable serine/threonine-protein kinase WNK11 isoform X1 [Glycine max]
Glyma.02G306600	--	--	Biological Process: protein ubiquitination (GO:0016567);;	--	--	--	NPH3 family;; BTB/POZ domain	BTB/POZ domain-containing protein At5g48130 GN=At5g48130 OS=Arabidopsis thaliana (Mouse-ear cress) PE=2 SV=1	PREDICTED: BTB/POZ domain-containing protein At5g48130-like [Glycine max]
Glyma.02G306700	[R]	General function prediction only	Molecular Function: nucleotide binding (GO:0000166);; Molecular Function: nucleic acid binding (GO:0003676);;	K14411|0.0|vvi:100246008|hypothetical protein LOC100246008	[A]	RNA processing and modification	RNA recognition motif. (a.k.a. RRM, RBD, or RNP domain);; RNA recognition motif (a.k.a. RRM, RBD, or RNP domain);; RNA recognition motif. (a.k.a. RRM, RBD, or RNP domain)	Heterogeneous nuclear ribonucleoprotein 1 GN=RNP1 OS=Arabidopsis thaliana (Mouse-ear cress) PE=1 SV=1	PREDICTED: heterogeneous nuclear ribonucleoprotein 1-like isoform X1 [Glycine max]
Glyma.02G306800	--	--	Cellular Component: integral component of membrane (GO:0016021);; Biological Process: oxidation-reduction process (GO:0055114);;	--	[T]	Signal transduction mechanisms	Protein of unknown function (DUF568);; Eukaryotic cytochrome b561	Cytochrome b561 and DOMON domain-containing protein At2g04850 (Precursor) GN=At2g04850 OS=Arabidopsis thaliana (Mouse-ear cress) PE=2 SV=2	PREDICTED: uncharacterized protein LOC100799859 [Glycine max]
Glyma.02G306900	--	--	--	--	[S]	Function unknown	Mo25-like	Putative MO25-like protein At5g47540 GN=At5g47540 OS=Arabidopsis thaliana (Mouse-ear cress) PE=2 SV=1	PREDICTED: putative MO25-like protein At5g47540-like [Glycine max]
Glyma.02G307000	[M]	Cell wall/membrane/envelope biogenesis	Molecular Function: polygalacturonase activity (GO:0004650);; Cellular Component: extracellular region (GO:0005576);; Biological Process: carbohydrate metabolic process (GO:0005975);; Molecular Function: galacturan 1,4-alpha-galacturonidase activity (GO:0047911);; Biological Process: cell wall organization (GO:0071555);;	--	--	--	Glycosyl hydrolases family 28	Polygalacturonase (Precursor) OS=Medicago sativa (Alfalfa) PE=2 SV=1	Polygalacturonase [Glycine soja]
Glyma.02G307100	[J]	Translation, ribosomal structure and biogenesis	Molecular Function: structural constituent of ribosome (GO:0003735);; Cellular Component: ribosome (GO:0005840);; Biological Process: DNA-templated transcription, elongation (GO:0006354);; Biological Process: translation (GO:0006412);;	K02881|4e-63|pop:POPTR_654691|hypothetical protein	[O]	Posttranslational modification, protein turnover, chaperones	Ribosomal L18p/L5e family	50S ribosomal protein L18, chloroplastic (Precursor) GN=OSJNBa0010E04.3 OS=Oryza sativa subsp. japonica (Rice) PE=2 SV=1	PREDICTED: uncharacterized protein LOC100526952 isoform X1 [Glycine max]
Glyma.02G307200	[R]	General function prediction only	Molecular Function: histone acetyltransferase activity (GO:0004402);; Biological Process: histone acetylation (GO:0016573);;	--	[S]	Function unknown	WD domain, G-beta repeat	Dynein assembly factor with WDR repeat domains 1 GN=DAW1 OS=Chlamydomonas reinhardtii (Chlamydomonas smithii) PE=1 SV=1	Putative WD repeat-containing protein C17D11.16 [Glycine soja]
Glyma.02G307300	[R]	General function prediction only	Molecular Function: alcohol dehydrogenase (NADP+) activity (GO:0008106);; Biological Process: flavonoid biosynthetic process (GO:0009813);; Molecular Function: 6'-deoxychalcone synthase activity (GO:0033808);; Biological Process: oxidation-reduction process (GO:0055114);;	--	[R]	General function prediction only	Aldo/keto reductase family	NAD(P)H-dependent 6&apos;-deoxychalcone synthase OS=Glycine max (Soybean) PE=1 SV=1	PREDICTED: NAD(P)H-dependent 6&apos;-deoxychalcone synthase-like [Glycine max]
Glyma.02G307400	--	--	Biological Process: leaf morphogenesis (GO:0009965);; Biological Process: cell differentiation (GO:0030154);; Biological Process: positive regulation of transcription, DNA-templated (GO:0045893);;	--	--	--	--	--	uncharacterized protein LOC100306425 [Glycine max]
Glyma.02G307500	--	--	--	--	--	--	--	Fruit protein pKIWI501 GN=pKIWI501 OS=Actinidia deliciosa (Kiwi) PE=2 SV=1	hypothetical protein glysoja_026006 [Glycine soja]
Glyma.02G307600	--	--	Molecular Function: Rho GDP-dissociation inhibitor activity (GO:0005094);; Molecular Function: GTPase activator activity (GO:0005096);; Molecular Function: protein binding (GO:0005515);; Cellular Component: cytoplasm (GO:0005737);; Biological Process: actin filament organization (GO:0007015);; Biological Process: cell tip growth (GO:0009932);; Biological Process: root epidermal cell differentiati…	K12462|1e-118|ath:AT3G07880|Rho GDP-dissociation inhibitor family protein	[T]	Signal transduction mechanisms	RHO protein GDP dissociation inhibitor	Rho GDP-dissociation inhibitor 1 GN=GDI1 OS=Arabidopsis thaliana (Mouse-ear cress) PE=1 SV=1	PREDICTED: rho GDP-dissociation inhibitor 1-like [Glycine max]
Glyma.02G307700	[M]	Cell wall/membrane/envelope biogenesis	Biological Process: acetyl-CoA metabolic process (GO:0006084);; Biological Process: plant-type cell wall organization (GO:0009664);; Biological Process: plant-type cell wall biogenesis (GO:0009832);; Biological Process: regulation of meristem growth (GO:0010075);; Biological Process: sterol biosynthetic process (GO:0016126);; Biological Process: brassinosteroid biosynthetic process (GO:0016132);;…	--	--	--	Fasciclin domain	Fasciclin-like arabinogalactan protein 7 (Precursor) GN=FLA7 OS=Arabidopsis thaliana (Mouse-ear cress) PE=1 SV=1	uncharacterized protein LOC100801468 precursor [Glycine max]
Glyma.02G307900	[Z]	Cytoskeleton	Molecular Function: actin binding (GO:0003779);;	--	[Z]	Cytoskeleton	Calponin homology (CH) domain;; CAMSAP CH domain	Fimbrin-5 {ECO:0000305} OS=Arabidopsis thaliana (Mouse-ear cress) PE=1 SV=1	PREDICTED: fimbrin-like protein 2-like [Glycine max]
Glyma.02G308000	[R]	General function prediction only	Biological Process: metabolic process (GO:0008152);; Molecular Function: hydrolase activity (GO:0016787);; Biological Process: actin filament-based movement (GO:0030048);; Biological Process: Golgi localization (GO:0051645);; Biological Process: mitochondrion localization (GO:0051646);; Biological Process: peroxisome localization (GO:0060151);;	--	[U]	Intracellular trafficking, secretion, and vesicular transport	Rab-GTPase-TBC domain	--	PREDICTED: TBC1 domain family member 2B-like isoform X2 [Glycine max]
Glyma.02G308100	--	--	Cellular Component: endoplasmic reticulum membrane (GO:0005789);; Biological Process: metabolic process (GO:0008152);; Biological Process: protein transport (GO:0015031);; Cellular Component: integral component of membrane (GO:0016021);; Biological Process: vesicle-mediated transport (GO:0016192);; Molecular Function: hydrolase activity (GO:0016787);; Cellular Component: ER to Golgi transport ves…	--	[U]	Intracellular trafficking, secretion, and vesicular transport	emp24/gp25L/p24 family/GOLD	Transmembrane emp24 domain-containing protein p24beta2 (Precursor) GN=At3g07680 OS=Arabidopsis thaliana (Mouse-ear cress) PE=1 SV=1	PREDICTED: uncharacterized protein LOC100527418 isoform X1 [Glycine max]
Glyma.02G308200	--	--	--	--	--	--	Cleavage site for pathogenic type III effector avirulence factor Avr	RPM1-interacting protein 4 GN=RIN4 OS=Arabidopsis thaliana (Mouse-ear cress) PE=1 SV=1	PREDICTED: RPM1-interacting protein 4-like [Glycine max]
Glyma.02G308300	--	--	Cellular Component: extracellular region (GO:0005576);; Cellular Component: plasma membrane (GO:0005886);; Cellular Component: integral component of membrane (GO:0016021);;	--	[OR]	--	--	--	PREDICTED: uncharacterized protein LOC100803585 [Glycine max]
Glyma.02G308400	--	--	Biological Process: RNA methylation (GO:0001510);; Cellular Component: mitochondrial intermembrane space (GO:0005758);; Biological Process: photorespiration (GO:0009853);; Biological Process: protein import into mitochondrial inner membrane (GO:0045039);; Molecular Function: metal ion binding (GO:0046872);;	--	[U]	Intracellular trafficking, secretion, and vesicular transport	Tim10/DDP family zinc finger	Mitochondrial import inner membrane translocase subunit TIM10 GN=TIM10 OS=Arabidopsis thaliana (Mouse-ear cress) PE=1 SV=1	unknown [Glycine max]
Glyma.02G308500	[I]	Lipid transport and metabolism	Molecular Function: acetyl-CoA C-acetyltransferase activity (GO:0003985);; Cellular Component: peroxisome (GO:0005777);; Cellular Component: cytosol (GO:0005829);; Cellular Component: plasma membrane (GO:0005886);; Biological Process: acetyl-CoA biosynthetic process (GO:0006085);; Biological Process: pollen germination (GO:0009846);; Biological Process: pollen tube growth (GO:0009860);; Biologica…	K00626|0.0|vvi:100240809|hypothetical protein LOC100240809	[I]	Lipid transport and metabolism	Thiolase, N-terminal domain;; Thiolase, C-terminal domain	Acetyl-CoA acetyltransferase, cytosolic 1 GN=MIF21.12 OS=Arabidopsis thaliana (Mouse-ear cress) PE=2 SV=1	PREDICTED: acetyl-CoA acetyltransferase, cytosolic 1-like isoform X1 [Glycine max]
Glyma.02G308600	[R]	General function prediction only	Molecular Function: kinase activity (GO:0016301);; Biological Process: phosphorylation (GO:0016310);;	--	[R]	General function prediction only	ABC1 family	Uncharacterized aarF domain-containing protein kinase At1g79600, chloroplastic (Precursor) GN=At1g79600 OS=Arabidopsis thaliana (Mouse-ear cress) PE=2 SV=1	PREDICTED: uncharacterized aarF domain-containing protein kinase At1g79600, chloroplastic-like [Glycine max]
Glyma.02G308700	[S]	Function unknown	Cellular Component: vacuolar membrane (GO:0005774);; Biological Process: acetyl-CoA metabolic process (GO:0006084);; Biological Process: calcium ion transport (GO:0006816);; Biological Process: Golgi organization (GO:0007030);; Biological Process: response to salt stress (GO:0009651);; Biological Process: sterol biosynthetic process (GO:0016126);; Biological Process: brassinosteroid biosynthetic …	--	--	--	Fasciclin domain	Fasciclin-like arabinogalactan protein 2 (Precursor) GN=FLA2 OS=Arabidopsis thaliana (Mouse-ear cress) PE=1 SV=1	PREDICTED: fasciclin-like arabinogalactan protein 2-like [Glycine max]
Glyma.02G308800	--	--	Molecular Function: kinase activity (GO:0016301);; Biological Process: phosphorylation (GO:0016310);;	--	[G]	Carbohydrate transport and metabolism	5'-AMP-activated protein kinase beta subunit, interation domain	SNF1-related protein kinase regulatory subunit beta-2 GN=KINB2 OS=Arabidopsis thaliana (Mouse-ear cress) PE=1 SV=1	PREDICTED: SNF1-related protein kinase regulatory subunit beta-2-like isoform X2 [Glycine max]
Glyma.02G308900	--	--	Cellular Component: integral component of membrane (GO:0016021);;	--	--	--	--	--	PREDICTED: uncharacterized protein LOC100805720 isoform X1 [Glycine max]
Glyma.02G309000	--	--	--	--	--	--	--	--	PREDICTED: uncharacterized protein LOC100806244 [Glycine max]
Glyma.02G309100	[V]	Defense mechanisms	Biological Process: metabolic process (GO:0008152);; Molecular Function: zinc ion binding (GO:0008270);; Molecular Function: ligase activity (GO:0016874);; Molecular Function: histone binding (GO:0042393);;	--	--	--	SAD/SRA domain;; Ring finger domain;; Zinc finger, C3HC4 type (RING finger);; Zinc finger, C3HC4 type (RING finger);; Zinc finger, C3HC4 type (RING finger)	E3 ubiquitin-protein ligase ORTHRUS 2 GN=F12K22.14 OS=Arabidopsis thaliana (Mouse-ear cress) PE=1 SV=1	PREDICTED: E3 ubiquitin-protein ligase ORTHRUS 2-like isoform X2 [Glycine max]
Glyma.02G309200	--	--	Biological Process: regulation of DNA replication (GO:0006275);; Biological Process: chromatin silencing (GO:0006342);; Biological Process: regulation of G2/M transition of mitotic cell cycle (GO:0010389);; Biological Process: histone H3-K9 methylation (GO:0051567);;	--	--	--	--	--	PREDICTED: uncharacterized protein LOC100787343 isoform X3 [Glycine max]
Glyma.02G309300	[E]	Amino acid transport and metabolism	Cellular Component: cytoplasm (GO:0005737);; Biological Process: L-phenylalanine catabolic process (GO:0006559);; Biological Process: cinnamic acid biosynthetic process (GO:0009800);; Molecular Function: phenylalanine ammonia-lyase activity (GO:0045548);;	K10775|0.0|rcu:RCOM_1355480|Phenylalanine ammonia-lyase, putative (EC:4.3.1.24)	[Q]	Secondary metabolites biosynthesis, transport and catabolism	Aromatic amino acid lyase	Phenylalanine ammonia-lyase class 3 OS=Phaseolus vulgaris (Kidney bean) PE=3 SV=1	PREDICTED: phenylalanine ammonia-lyase class 3 isoform X1 [Glycine max]
Glyma.02G309400	--	--	Cellular Component: endosome (GO:0005768);; Cellular Component: vacuolar membrane (GO:0005774);; Cellular Component: trans-Golgi network (GO:0005802);; Cellular Component: plasmodesma (GO:0009506);; Cellular Component: integral component of membrane (GO:0016021);;	--	[U]	Intracellular trafficking, secretion, and vesicular transport	Endomembrane protein 70	Transmembrane 9 superfamily member 12 {ECO:0000305} (Precursor) OS=Arabidopsis thaliana (Mouse-ear cress) PE=2 SV=1	PREDICTED: transmembrane 9 superfamily member 4-like [Glycine max]
Glyma.02G309500	--	--	Cellular Component: photosystem I (GO:0009522);; Cellular Component: photosystem II (GO:0009523);; Cellular Component: chloroplast thylakoid membrane (GO:0009535);; Biological Process: photosynthesis, light harvesting (GO:0009765);; Cellular Component: plastoglobule (GO:0010287);; Cellular Component: integral component of membrane (GO:0016021);; Molecular Function: chlorophyll binding (GO:0016168…	K08909|1e-180|pop:POPTR_664934|Lhca3	--	--	Chlorophyll A-B binding protein	Chlorophyll a-b binding protein 3, chloroplastic (Precursor) OS=Pisum sativum (Garden pea) PE=1 SV=1	Chlorophyll a-b binding protein 3, chloroplastic [Glycine soja]
Glyma.02G309600	[R]	General function prediction only	Molecular Function: N-acetyltransferase activity (GO:0008080);; Biological Process: metabolic process (GO:0008152);;	--	[R]	General function prediction only	Acetyltransferase (GNAT) family;; Acetyltransferase (GNAT) domain;; Acetyltransferase (GNAT) domain;; Acetyltransferase (GNAT) domain;; FR47-like protein;; Acetyltransferase (GNAT) domain;; Acetyltransferase (GNAT) domain	N-alpha-acetyltransferase MAK3 GN=F16M14.6 OS=Arabidopsis thaliana (Mouse-ear cress) PE=2 SV=1	uncharacterized protein LOC100499961 [Glycine max]
Glyma.02G309700	--	--	Biological Process: metabolic process (GO:0008152);; Molecular Function: microtubule-severing ATPase activity (GO:0008568);; Cellular Component: plastid (GO:0009536);;	--	[R]	General function prediction only	PPR repeat family;; PPR repeat;; Pentatricopeptide repeat domain;; PPR repeat	Pentatricopeptide repeat-containing protein At3g22150, chloroplastic (Precursor) GN=PCMP-E95 OS=Arabidopsis thaliana (Mouse-ear cress) PE=2 SV=1	PREDICTED: pentatricopeptide repeat-containing protein At3g22150, chloroplastic [Glycine max]
Glyma.02G309800	--	--	Biological Process: metabolic process (GO:0008152);; Molecular Function: hydroquinone glucosyltransferase activity (GO:0050505);;	--	[GC]	--	UDP-glucoronosyl and UDP-glucosyl transferase	Putative UDP-glucose flavonoid 3-O-glucosyltransferase 3 {ECO:0000250|UniProtKB:Q2V6K0} OS=Fragaria ananassa (Strawberry) PE=2 SV=1	PREDICTED: putative UDP-glucose flavonoid 3-O-glucosyltransferase 3-like [Glycine max]
Glyma.02G309900	[MI]	--	Molecular Function: choline-phosphate cytidylyltransferase activity (GO:0004105);; Biological Process: CDP-choline pathway (GO:0006657);;	K00968|0.0|vvi:100267395|hypothetical protein LOC100267395	[I]	Lipid transport and metabolism	Cytidylyltransferase	Choline-phosphate cytidylyltransferase 1 GN=T32F6.22 OS=Arabidopsis thaliana (Mouse-ear cress) PE=1 SV=1	Choline-phosphate cytidylyltransferase B [Glycine soja]
Glyma.02G310000	--	--	Biological Process: metabolic process (GO:0008152);; Molecular Function: zinc ion binding (GO:0008270);; Molecular Function: ligase activity (GO:0016874);;	--	[A]	RNA processing and modification	RING-variant domain	Probable E3 ubiquitin ligase SUD1 GN=F28A23.140 OS=Arabidopsis thaliana (Mouse-ear cress) PE=1 SV=1	hypothetical protein glysoja_039549, partial [Glycine soja]
